# Supplementary material for: Heterogeneously catalyzed thioether metathesis by a supported Au–Pd alloy nanoparticle design based on Pd ensemble control
Source: Royal Society of Chemistry journal article supplement (doi:10.1039/d4sc02732a), 2024-01-01
Supplement: d4sc02732a1.pdf [file d4sc02732a1.pdf]

*Electronic Supplementary Information (ESI) for*

**Heterogeneously catalyzed thioether metathesis by a supported Au–Pd alloy  
nanoparticle design based on Pd ensemble control**

Takehiro Matsuyama,<sup>a</sup> Takafumi Yatabe,<sup>\*ab</sup> Tomohiro Yabe,<sup>a</sup> and Kazuya Yamaguchi  
\*a

<sup>a</sup>Department of Applied Chemistry, School of Engineering, The University of Tokyo, 7-3-1  
Hongo, Bunkyo-ku, Tokyo 113-8656, Japan.

<sup>b</sup>Precursory Research for Embryonic Science and Technology (PRESTO), Japan Science and  
Technology Agency (JST), 4-1-8 Honcho, Kawaguchi, Saitama 332-0012, Japan.

\*e-mail: yatabe@appchem.t.u-tokyo.ac.jp, kyama@appchem.t.u-tokyo.ac.jp

**Table of Contents**

|                                                            |                |
|------------------------------------------------------------|----------------|
| <b>Methods and Spectral Data of Synthesized Substrates</b> | <b>S2–S12</b>  |
| <b>Spectral Data of Products</b>                           | <b>S13–S20</b> |
| <b>Supplementary References</b>                            | <b>S21</b>     |
| <b>Supplementary Figures</b>                               | <b>S22–S31</b> |
| <b>Supplementary Tables</b>                                | <b>S32–S35</b> |
| <b>NMR Spectra</b>                                         | <b>S36–S46</b> |
| <b>Cartesian Coordinates of Optimized Structures</b>       | <b>S47–S72</b> |

## **Methods and Spectral Data of Synthesized Substrates**

### **Instrumental and Reagents**

Gas chromatography (GC) analyses were conducted on Shimadzu GC-2014 equipped with a flame ionization detector (FID) and an InertCap-5 (60 m) using Shimadzu C-R8A Chromatopac Data Processor for area calculations. GC mass spectrometry (GC-MS) spectra were performed by Shimadzu GCMS-QP2020 equipped with an InertCap-5 MS/NP capillary column (30 m) at an ionization voltage of 70 eV. Liquid-state NMR spectra were recorded on JEOL JNM-ECA-500.  $^1\text{H}$  and  $^{13}\text{C}$  NMR spectra were measured at 500.16 and 125.77 Hz respectively.  $^1\text{H}$  and  $^{13}\text{C}$  NMR chemical shifts were referenced to tetramethylsilane (TMS) signal ( $\delta = 0$  ppm) or the solvent peak ( $^{13}\text{C}$  NMR using dimethyl sulfoxide- $d_6$ :  $\delta = 39.5$  ppm).  $^{19}\text{F}$  NMR spectra were measured at 470.62 Hz using  $\text{CF}_3\text{COOH}$  as an external reference ( $\delta = -77.0$  ppm). ICP-AES analyses were conducted by Shimadzu ICPS-8100. Scanning transmission electron microscopy (STEM) observations were performed on a JEOL JEM-ARM200F. XRD patterns were recorded on a Rigaku SmartLab diffractometer ( $\text{Cu K}\alpha$ ,  $\lambda = 1.5405 \text{ \AA}$ , 45 kV, 20 mA). Au loadings of supported Au–Pd alloy nanoparticle catalysts were determined by X-ray fluorescence spectrometry (XRF) measurement using ZSX PrimusII (Rigaku, Japan). X-ray absorption spectroscopy (XAS) was carried out at the BL14B2 beamline of SPring-8 (Proposal No. 2023A1512). The XPS spectra were measured on an Ulvac-Phi PHI5000 VersaProbe at the Advanced Characterization Nanotechnology Platform of the University of Tokyo. The binding energies were calibrated by using the C 1s signal at 284.8 eV. Diffuse reflectance infrared Fourier transform spectroscopy (DRIFT) was performed using FT/IR-6700 spectrometer (JASCO). Supported nanoparticle catalysts were exposed to 16 Torr of CO followed by evacuation for 1 min, and then, the DRIFT measurement of CO adsorbed on the catalysts was performed. Only in the case of  $\text{Au}_{1.6}/\text{TiO}_2$ , the DRIFT of adsorbed CO was measured under 16 Torr of CO. The DRIFT spectra measured in vacuo were subtracted as the backgrounds. Solvents and substrates were obtained from Tokyo Chemical Industry, Aldrich, Kanto Chemical, or FUJIFILM Wako Pure Chemical (reagent grade), and purified prior to being used, if necessary.

### **XAS Measurements and EXAFS Fitting**

X-ray absorption spectroscopy (XAS) was carried out at the BL14B2 beamline of SPring-8 (Proposal No. 2023A1512). Pd K-edge and Au  $L_{\text{III}}$ -edge X-ray absorption fine structure (XAFS) measurements were conducted in transmission and fluorescence mode using a Si (311) crystal monochromator. Each sample was formed into a pellet, doubly wrapped in a plastic laminate pack, and heat-sealed in an air atmosphere. X-ray absorption near-edge structure (XANES) and extended X-ray absorption fine structure (EXAFS) data were analyzed using Athena and Artemis software (Demeter, ver. 0.9.025; Bruce Ravel). The data reduction procedure for EXAFS consisted briefly of the following steps: pre-edge subtraction, background determination, normalization, and spectra

averaging. The edge position is defined to be the first inflection point on the leading absorption peak. The energy was calibrated using Pd foil for the Pd K-edge XAS and Au foil for the Au L<sub>III</sub>-edge XAS. The background in the EXAFS region was approximated using a cubic spline routine and optimized according to the criteria described by Cook and Sayers.<sup>S1</sup> Then, the spectra were normalized by the edge-step at 50 eV after the absorption edge. The  $k^3$ -weighted EXAFS functions were Fourier transformed, filtered, and fitted in  $R$ -space in the range of 3–13 Å<sup>-1</sup> for Au and 3–12 Å<sup>-1</sup> for Pd. Fourier filtering was used to isolate the contributions of specific shells and to eliminate low frequency background and high frequency noise. Fourier filtering was done by choosing a window in the Fourier transform spectrum and calculating the inverse Fourier Transform of the selected  $R$  range. The interatomic distance ( $R$ ), the first nearest-neighbor coordination number (C.N.), the difference of the Debye–Waller factor from the reference ( $\sigma^2$ ), and the correction of the threshold energy ( $\Delta E_{j0}$ ) were treated as free parameters during the fitting. The quality of the fit was estimated from  $R$ -factor.  $R$ -factor represented the residuals between the observed and calculated spectrum in the fitted range. Low values of  $R$ -factor indicated a good agreement between the data and model. Fitting analysis using  $k^3$ -weighted Fourier transforms was applied to obtain a unique set of C.N. and  $\sigma^2$  parameters. Those parameters are highly correlated, and there are several different combinations of C.N. and  $\sigma^2$  that can lead to similar fits; however, the set of combinations depends on the  $k^3$ -weight factor.<sup>S2</sup> Therefore, a unique set of parameters might be found by fitting on  $k^3$ -weighted Fourier transforms. To analyze the spectra, simulations of reference compounds using FEFF6 were used to calculate phase shifts and backscattering amplitude. FEFF references were obtained for Pd–Pd by utilizing crystallographic data of Pd (crystal system: cubic),<sup>S3</sup> for Pd–O by utilizing crystallographic data of PdO (crystal system: tetragonal),<sup>S4</sup> for Au–Au by utilizing crystallographic data of Au (crystal system: cubic),<sup>S5</sup> for Pd–Au by utilizing a model in which one of the Au or Pd atoms was substituted for Pd or Au in the crystal data model of Au or Pd.

### **Preparation of Supported Catalysts**

Au<sub>4.4</sub>–Pd<sub>1</sub>/TiO<sub>2</sub> was prepared as follows: The aqueous solution (60 mL) of HAuCl<sub>4</sub>·4H<sub>2</sub>O (247.1 mg, 10.0 mM), PdCl<sub>2</sub> (17.7 mg, 1.7 mM), and KCl (29.8 mg, 6.7 mM) containing TiO<sub>2</sub> (2.0 g) was vigorously stirred at room temperature. After 15 min, the pH of the solution was adjusted to 9.0 by addition of an aqueous solution of NaOH (1.0 M), and the resulting slurry was stirred overnight. The solid was then filtered off, washed with a large amount of water (2 L), and dried to afford 2.0 g of Au<sub>4.4</sub>(OH)<sub>*x*</sub>–Pd<sub>1</sub>(OH)<sub>*x*</sub>/TiO<sub>2</sub> as a ochre powder. Au<sub>4.4</sub>(OH)<sub>*x*</sub>–Pd<sub>1</sub>(OH)<sub>*x*</sub>/TiO<sub>2</sub> (2.0 g) was added to water (60 mL), and then added NaBH<sub>4</sub> (240 mg) in an open air. The mixture was vigorously stirred at room temperature for 2 h. The solid was then filtered off, washed with deionized water (2 L), and dried under an Ar atmosphere to afford 2.0 g of Au<sub>4.4</sub>–Pd<sub>1</sub>/TiO<sub>2</sub> as black powder (Au content: 3.85 wt%, Pd content: 0.47 wt%). Various supported Au–Pd alloy nanoparticle catalysts, such as Au<sub>5.4</sub>–

Pd<sub>1</sub>/LDH (Au content: 5.4 wt%, Pd content: 0.54 wt%), Au<sub>1.4</sub>-Pd<sub>1</sub>/CeO<sub>2</sub> (Au content: 1.2 wt%, Pd content: 0.45 wt%), Au<sub>2.5</sub>-Pd<sub>1</sub>/ZrO<sub>2</sub> (Au content: 1.9 wt%, Pd content: 0.42 wt%), Au<sub>3.6</sub>-Pd<sub>1</sub>/Al<sub>2</sub>O<sub>3</sub> (Au content: 3.2 wt%, Pd content: 0.47 wt%), and Au<sub>2.6</sub>-Pd<sub>1</sub>/HAP (Au content: 2.3 wt%, Pd content: 0.48 wt%) were prepared in the same method by changing the supports. Also, TiO<sub>2</sub>-supported Au-Pd alloy nanoparticle catalysts with various Au/Pd ratios, such as Au<sub>3.0</sub>-Pd<sub>1</sub>/TiO<sub>2</sub> (Au content: 1.43 wt%, Pd content: 0.48 wt%), Au<sub>1.4</sub>-Pd<sub>1</sub>/TiO<sub>2</sub> (Au content: 0.65 wt%, Pd content: 0.46 wt%), Au<sub>0.7</sub>-Pd<sub>1</sub>/TiO<sub>2</sub> (Au content: 0.33 wt%, Pd content: 0.50 wt%), Au<sub>1.6</sub>/TiO<sub>2</sub> (Au content: 0.84 wt%), and Pd<sub>1</sub>/TiO<sub>2</sub> (Pd content: 0.45 wt%) were prepared in the same method by changing the amount of metal sources. The supported amounts of Pd and Au were determined by ICP-AES. As for TiO<sub>2</sub>-supported Au-Pd alloy nanoparticle catalysts, the Au loadings were determined by XRF. Other metal catalysts, such as Ru<sub>6</sub>-Pd<sub>1</sub>/TiO<sub>2</sub>, Co<sub>6</sub>-Pd<sub>1</sub>/TiO<sub>2</sub>, Ni<sub>6</sub>-Pd<sub>1</sub>/TiO<sub>2</sub>, and Ag<sub>6</sub>-Pd<sub>1</sub>/TiO<sub>2</sub> were prepared in the same method using RuCl<sub>3</sub>·*n*H<sub>2</sub>O, CoCl<sub>2</sub>·6H<sub>2</sub>O, NiCl<sub>2</sub>·6H<sub>2</sub>O, and AgNO<sub>3</sub> as a metal source, respectively. As for Co<sub>6</sub>-Pd<sub>1</sub>/TiO<sub>2</sub> and Ni<sub>6</sub>-Pd<sub>1</sub>/TiO<sub>2</sub>, the catalysts were reduced and stored in an Ar-filled glovebox.

#### **A Typical Procedure for Thioether Metathesis**

In an Ar-filled glovebox, Au<sub>4.4</sub>-Pd<sub>1</sub>/TiO<sub>2</sub> (Pd: 2.5 mol%), phenyl sulfide (**1a**, 0.5 mmol), *p*-tolyl sulfide (**1b**, 0.1 mmol), 1,3,5-trimethoxybenzene or dodecane (0.1 mmol, internal standard), xylene (2 mL), and a Teflon-coated magnetic stir bar were placed in a Pyrex glass reactor (volume: ~20 mL). The mixture was stirred at 120 °C for 3 h, then the mixture was cooled down to room temperature. When naphthalene was used as the internal standard, it was added to the reaction mixture after the reaction. Conversions and product yields were determined by GC analysis using 1,3,5-trimethoxybenzene, dodecane, or naphthalene as an internal standard. As for isolation of the products, an internal standard was not added. After the reaction, the catalyst was removed by simple filtration and the filtrate was concentrated by evaporation, and then subjected to silica-gel column chromatography, giving the pure product. The products were identified by GC-MS, and NMR (<sup>1</sup>H, <sup>13</sup>C, and <sup>19</sup>F).

#### **Leaching Test**

A magnetic stir bar, 1,3,5-trimethoxybenzene, **1a** (0.5 mmol), **1b** (0.1 mmol), Au<sub>4.4</sub>-Pd<sub>1</sub>/TiO<sub>2</sub> (Pd: 2.5 mol%), and xylene (2 mL) were added to a Pyrex glass reactor (volume: ~20 mL), and the reaction was carried out at 140 °C in an Ar-filled glovebox. 30 min after the start of the reaction, the reaction solution was filtered by hot filtration using a disposable syringe with a PTFE membrane filter into another Pyrex glass reactor that had been previously heated to 140 °C with a magnetic stir bar, and then the reaction solution was stirred at 140 °C for additional 150 min.

As for investigation of the leaching metal amounts, the reaction was prepared as described above, and the solution 4 h after the start of the reaction was filtered using a disposable syringe with

a PTFE membrane filter. The solvent toluene was removed using a rotary evaporator before aqua regia (1 mL) was added, and the amount of Au and Pd species leached into the reaction solution was measured by ICP-AES. The measurement wavelengths were 324.270 nm (Pd) and 242.795 nm (Au).

The results showed that the reaction was immediately stopped by hot filtration, and Pd and Au species in the solution after the reaction were hardly observed by ICP-AES (Pd: below the detection limit, Au: 0.004% of the Au species used for the reaction), confirming that Au<sub>4.4</sub>-Pd<sub>1</sub>/TiO<sub>2</sub> functioned as a heterogeneous catalyst.

### **Reuse Experiment**

A magnetic stir bar, 1,3,5-trimethoxybenzene, **1a** (0.5 mmol), **1b** (0.1 mmol), Au<sub>4.4</sub>-Pd<sub>1</sub>/TiO<sub>2</sub> (Pd: 5 mol%), and 1,4-dioxane (2 mL) were added to a Pyrex glass reactor (volume: ~20 mL), and the reaction was carried out at 140 °C for 3 h. After the decarbonylation reaction using Au<sub>4.4</sub>-Pd<sub>1</sub>/TiO<sub>2</sub>, the catalyst was retrieved by filtration in an open air through washing with 100 mL of Et<sub>2</sub>O followed by drying *in vacuo*. Then, the catalyst was calcinated at 300 °C for 3 h in an air, reduced by NaBH<sub>4</sub> in water, and then, subjected to the metathesis between **1a** and **1b** under the same reaction conditions.

### **Density Functional Theory (DFT) Calculation**

In this work, we used Pd<sub>20</sub>, Au<sub>4</sub>Pd<sub>16</sub>, and Au<sub>2</sub>Pd<sub>18</sub> models to calculate the adsorption structures and oxidative adducts of phenyl sulfide (**1a**) based on previous reports.<sup>S6</sup> The DFT calculations with the M06 functional were performed using Gaussian16 Rev. C as the calculation software, the Stuttgart/Dresden basis set (SDD) with the effective core potential for Au and Pd and 6-31G(d,p) as the basis sets for the other elements, including H, C, and S atoms, based on previous reports.<sup>S6,S7</sup> The DFT calculations using Pd<sub>20</sub>, Au<sub>16</sub>Pd<sub>4</sub>, and Au<sub>18</sub>Pd<sub>2</sub> models were performed with spin multiplicity of 1 and charge of 0. We confirmed that the optimized structures contained no imaginary frequency. All thermodynamic data were calculated at the standard state (25 °C and 1 atm). Each structure was depicted by software Avogadro and GaussView. The Cartesian coordinates of the optimized structures are given in the end of this SI. The optimized structure of **1a**, Pd<sub>20</sub>, Au<sub>16</sub>Pd<sub>4</sub>, and Au<sub>18</sub>Pd<sub>2</sub> are shown in Fig. S8.

### **DFT Calculations for **1a** adsorbed on Pd<sub>20</sub>**

Considering the symmetry of Pd<sub>20</sub> cluster, S-atom of **1a** can adsorb on three kinds of sites on Pd<sub>20</sub>: center, side, and top Pd atom of Pd<sub>20</sub> (Fig. S9a). We conducted the DFT calculations of the structures of **1a** adsorbed on center, side, and top Pd atom of Pd<sub>20</sub>, named Pd<sub>20</sub>-**1a**\_C, Pd<sub>20</sub>-**1a**\_S, and Pd<sub>20</sub>-**1a**\_T structure, respectively. The optimized structures of Pd<sub>20</sub>-**1a**\_C, Pd<sub>20</sub>-**1a**\_S, and Pd<sub>20</sub>-**1a**\_T and the corresponding adsorption Gibbs energies and enthalpies ( $\Delta G = G_{cluster\ interacted\ with\ 1a} - G_{cluster} -$

$G_{1a}$ ) ( $\Delta H = H_{cluster\text{ interacted with }1a} - H_{cluster} - H_{1a}$ ) are summarized in Fig. S9b–d. Although Pd<sub>20</sub>**1a**\_C and Pd<sub>20</sub>**1a**\_T are almost equally stable in the viewpoint of both adsorption Gibbs energies and enthalpies among the three structures, we used Pd<sub>20</sub>**1a**\_C structure for further investigation because the majority of Pd species involved in the reaction is considered to be located at the facet of Pd nanoparticles based on the fact that a mean diameter of Pd nanoparticles in Pd<sub>1</sub>/TiO<sub>2</sub> is 2.97 nm (Fig. S7a).

### **DFT Calculations for 1a adsorbed on Au–Pd alloy nanoclusters**

Based on the aforementioned results of **1a** adsorption on Pd<sub>20</sub>, experimental results that TiO<sub>2</sub>-supported Au–Pd alloy nanoparticle catalyst with high Au/Pd ratio exhibited higher catalytic performance (Table 1), and CO-DRIFT spectra of the Au–Pd alloy catalysts (Fig. 2a), DFT calculations of **1a** adsorption on the Pd atom of Au<sub>16</sub>Pd<sub>4</sub> and Au<sub>18</sub>Pd<sub>2</sub> cluster models which possess four or two center Pd atoms with symmetrical initial structures were investigated, respectively. As shown in Fig. S8, the adsorption Gibbs energy and enthalpy of **1a** on Au<sub>16</sub>Pd<sub>4</sub> (Au<sub>16</sub>Pd<sub>4</sub>**1a**\_C) were comparable with those on Au<sub>18</sub>Pd<sub>2</sub> (Au<sub>18</sub>Pd<sub>2</sub>**1a**\_C) (Fig. S10a,b), but the optimized structure of Au<sub>16</sub>Pd<sub>4</sub> in Au<sub>16</sub>Pd<sub>4</sub>**1a**\_C was distorted while the counterpart using Au<sub>18</sub>Pd<sub>2</sub> was not (Fig. S10c). Thus, we used the Au<sub>18</sub>Pd<sub>2</sub> cluster model as the Au–Pd alloy nanoparticle model in the following calculation. Noteworthily, the adsorption Gibbs energy ( $\Delta G$ ) of Au<sub>18</sub>Pd<sub>2</sub>**1a**\_C is moderate, but that of Pd<sub>20</sub>**1a**\_C is too large to proceed with the product desorption step in the direct metathesis reaction. In fact, the optimized structure of **1a** on Pd<sub>20</sub> revealed the strong  $\pi$ -adsorption **1a** onto the facet of Pd<sub>20</sub>, whereas the adsorption mode of **1a** on Au<sub>18</sub>Pd<sub>2</sub> was totally different: almost no  $\pi$ -adsorption was observed while S-atom in **1a** was coordinated to Pd center. It was corroborated by the fact that natural bond orbital (NBO) charge of phenyl group in **1a** adsorbed on Pd<sub>20</sub> increased compared with free **1a** probably due to  $\pi$ -back donation from Pd species to phenyl rings of **1a** but that on Au<sub>18</sub>Pd<sub>2</sub> decreased possibly as the result of  $\sigma$ -donation from S atom to Pd atom (Fig. S11).

### **DFT Calculations for oxidative adducts of 1a on Au–Pd alloy nanoclusters**

DFT calculations of **1a** oxidative adducts to Au<sub>18</sub>Pd<sub>2</sub> were performed. As a result, even when an oxidative adduct of **1a** to the Pd center was used as an initial structure (Fig. S12a), the thiolate species moved onto Au species in a bridged adsorption manner after the geometry optimization (Fig. S12b), suggesting that spillover of thiolate or aryl species can easily occur after the oxidative addition step. Then, we calculated the four oxidative adduct structures after the spillover in bridged adsorption manners: whether it is Ph or SPh that moves onto Au and whether the Au species which a fragment moves onto are near or far from another Pd atom. The optimized structures and their  $\Delta G$  were summarized in Fig. S13. The optimized structure of **1a** oxidative adduct in which SPh species moved onto Au near another Pd atom proved to be the most stable structure with a  $\Delta G$  value of  $-27.1$  kcal/mol,

which is also moderate value to proceed with the product desorption step in the direct metathesis reaction.

### Synthesis of Thioethers

#### Condition A

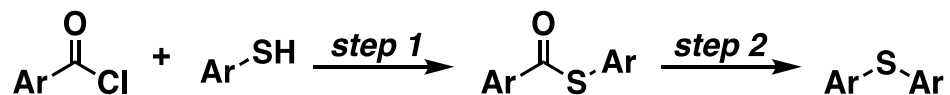

Step 1 (thioester synthesis): Acyl chlorides (6.3 mmol) and thiols (6.0 mmol) were dissolved in dehydrated dichloromethane (10 mL) in an Ar atmosphere. The solution was stirred at 0 °C for a few minutes. Triethylamine (12.0 mmol) was added to the solution in a dropwise manner followed by stirring at room temperature overnight. After the reaction, aqueous HCl solution (10 mL) was added and the organic layer was washed with brine (10 mL × 3) and deionized water (10 mL × 1) to afford analytically pure thioesters. The products were purified by silica-gel column chromatography if necessary.<sup>S8</sup>

Step 2 (thioester decarbonylation): Thioesters, a hydroxyapatite-supported Pd nanoparticle catalyst (Pd/HAP, Pd: 8 mol%), xylene (2 mL), and a Teflon-coated magnetic stir bar were placed in a Pyrex glass reactor (volume: ~20 mL) in an Ar atmosphere. The mixture was stirred at 160 °C for 24 h. After 24 h, Pd/HAP was removed by simple filtration. The crude thioethers were purified by silica-gel column chromatography using hexane and ethyl acetate as eluents, giving the pure products. **1b–1f**, **1h–1n** were synthesized under the Condition A.<sup>S9</sup>

#### Condition B

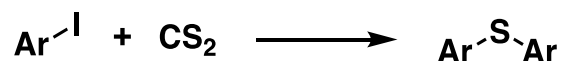

Aryl iodides (1 mmol), CuI (10 mol%), and a Teflon-coated magnetic stir bar were placed in a Pyrex glass reactor (volume: ~20 mL). In an Ar-filled glovebox, 1,8-diazabicyclo[5.4.0]undec-7-ene (DBU) (2 mmol) and toluene (1.5 mL) were added. Then, dropwise CS<sub>2</sub> (1 mmol) was added and heated at 100 °C for 12 h. After the reaction, ethyl acetate (5 mL) and deionized water (5 mL) were added, and the aqueous layer was extracted with brine (5 mL × 3). The crude thioethers were purified by silica-gel column chromatography using hexane and ethyl acetate as eluents, giving the pure products. **1p**, **1s**, and **1t** were synthesized under the Condition B.<sup>S10</sup>

**Condition C**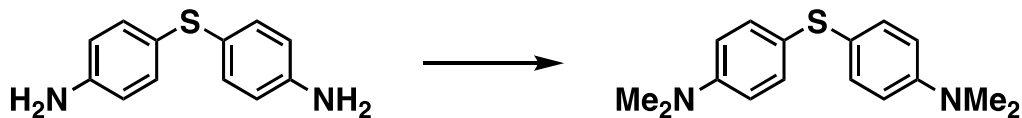

For the synthesis of bis[4-(*N,N*-dimethylamino)phenyl] sulfide (**1s**), *N*-methylation of bis(4-aminophenyl)sulfide (**1p**) was conducted. Bis(4-aminophenyl)sulfide and  $K_2CO_3$  (10 eq.) were dissolved in acetone in an Ar atmosphere, then iodomethane (4.5 eq.) was added. The resulting mixture was heated under reflux conditions overnight. After the reaction, deionized water (30 mL) was added, and the products were extracted with ethyl acetate (10 mL  $\times$  3). The crude thioethers were purified by silica-gel column chromatography using hexane and ethyl acetate as eluents, giving the pure products.<sup>S11</sup>

**Condition D**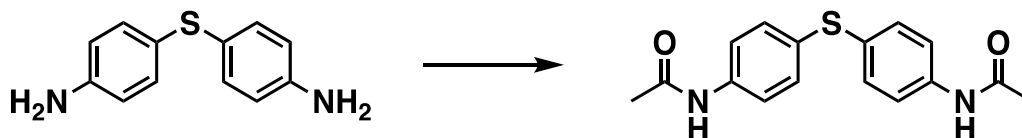

For the synthesis of *N,N'*-(thiodi-4,1-phenylene)bis acetamide (**1t**), *N*-amidation of bis(4-aminophenyl)sulfide (**1p**) was conducted. Bis(4-aminophenyl)sulfide was dissolved in dichloromethane (20 mL) at room temperature. Dropwise acetic anhydride (2.4 eq.) was added to afford precipitates immediately. After the reaction for 12 h, the precipitates were washed with ethyl acetate to afford the analytically pure product.<sup>S12</sup>



### Spectral Data of Thioether Substrates

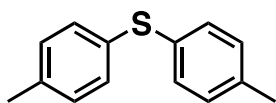

**p-tolylsulfide** (CAS No. 6620-94-0, **1b**). 63% isolated yield.  $^1\text{H NMR}$  (500 MHz,  $\text{CDCl}_3$ ):  $\delta$  7.21–7.23 (m, 4H), 7.08–7.09 (m, 4H), 2.31 (s, 6H);  $^{13}\text{C NMR}$  (125 MHz,  $\text{CDCl}_3$ ):  $\delta$  137.0, 132.8, 131.2, 130.0, 21.2. MS (EI):  $m/z$  (%): 215 (17), 214 (100) [ $M^+$ ], 213 (16), 199 (38), 198 (16), 184 (23), 181 (13), 105 (17), 91 (27), 65 (14).<sup>S13</sup>

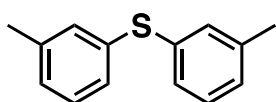

**m-tolylsulfide** (CAS No. 3111-77-1, **1c**). >99% isolated yield.  $^1\text{H NMR}$  (500 MHz,  $\text{CDCl}_3$ ):  $\delta$  7.16–7.19 (m, 4H), 7.11–7.13 (m, 2H), 7.03–7.05 (m, 2H), 2.30 (s, 6H);  $^{13}\text{C NMR}$  (125 MHz,  $\text{CDCl}_3$ ):  $\delta$  139.1, 135.7, 131.7, 129.1, 128.2, 128.0, 21.4. MS (EI):  $m/z$  (%): 215 (16), 214 (100) [ $M^+$ ], 213 (12), 199 (48), 198 (20), 197 (12), 184 (41), 165 (13), 105 (22), 91 (17), 77 (11), 65 (26), 63 (10).<sup>S13</sup>

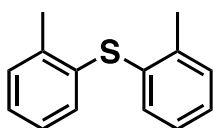

**o-tolylsulfide** (CAS No. 4537-05-7, **1d**). 87% isolated yield.  $^1\text{H NMR}$  (500 MHz,  $\text{CDCl}_3$ ):  $\delta$  7.22–7.24 (m, 2H), 7.14–7.18 (m, 2H), 7.04–7.10 (m, 4H), 2.38 (s, 6H);  $^{13}\text{C NMR}$  (125 MHz,  $\text{CDCl}_3$ ):  $\delta$  138.9, 134.3, 131.1, 130.4, 127.1, 126.7, 20.4. MS (EI):  $m/z$  (%): 215 (16), 214 (100) [ $M^+$ ], 199 (22), 197 (13), 184 (15), 166 (10), 165 (15), 123 (19), 122 (97), 121 (65), 105 (27), 92 (11), 91 (47), 89 (16), 78 (19), 77 (22), 65 (35), 63 (14), 51 (10).<sup>S13</sup>

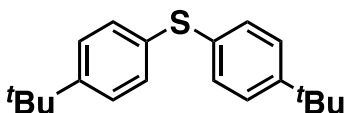

**1,1'-thiobis[4-(1,1-dimethylethyl)benzene]** (CAS No. 52908-55-1, **1e**). 79% isolated yield.  $^1\text{H NMR}$  (500 MHz,  $\text{CDCl}_3$ ):  $\delta$  7.31–7.33 (m, 4H), 7.26–7.28 (m, 4H), 1.30 (s, 9H);  $^{13}\text{C NMR}$  (125 MHz,  $\text{CDCl}_3$ ):  $\delta$  152.7, 135.1, 133.3, 128.8, 37.1, 33.9. MS (EI):  $m/z$  (%): 299 (10), 298 (45) [ $M^+$ ], 284 (21), 283 (100), 134 (12), 106 (22).<sup>S13</sup>

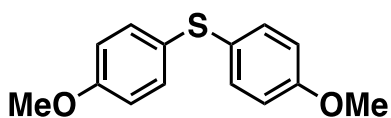

**4,4'-dimethoxydiphenyl sulfide** (CAS No. 3393-77-9, **1f**). 76% isolated yield.  $^1\text{H NMR}$  (500 MHz,  $\text{CDCl}_3$ ):  $\delta$  7.25–7.28 (m, 4H), 6.81–6.84 (m, 4H), 3.77 (s, 6H);  $^{13}\text{C NMR}$  (125 MHz,  $\text{CDCl}_3$ ):  $\delta$  159.1, 132.8, 127.5, 114.9, 55.4. MS (EI):  $m/z$  (%): 247 (17), 246 (100) [ $M^+$ ], 231 (47), 215 (10), 214 (12), 203 (12), 199 (10), 188 (10), 171 (12), 115 (10).<sup>S13</sup>

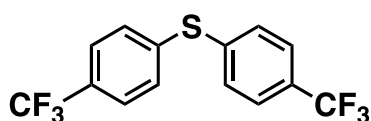

**bis[(4-trifluoromethyl)phenyl]sulfide** (CAS No. 90141-51-8, **1g**). 93% isolated yield.  $^1\text{H NMR}$  (500 MHz,  $\text{CDCl}_3$ ):  $\delta$  7.58–7.59 (m, 4H), 7.43–7.45 (m, 4H);  $^{13}\text{C NMR}$  (125 MHz,  $\text{CDCl}_3$ ):  $\delta$  139.7, 131.2, 129.8 (q,  $J = 32.3$  Hz), 126.4 (q,  $J = 3.6$  Hz), 124.0 (q,  $J = 270.6$  Hz);  $^{19}\text{F NMR}$  (470 MHz,  $\text{CDCl}_3$ ):  $\delta$  -61.9. MS (EI):  $m/z$  (%): 323 (16), 322 (100) [ $M^+$ ], 303 (13), 301 (17), 253 (13), 252 (11), 233 (27), 184 (13).<sup>S13</sup>

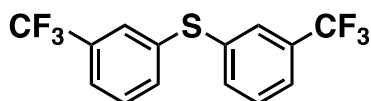

**bis[(3-trifluoromethyl)phenyl]sulfide** (CAS No. 1580-30-9, **1h**). 90% isolated yield.  $^1\text{H NMR}$  (500 MHz,  $\text{CDCl}_3$ ):  $\delta$  7.62 (m, 2H), 7.53–7.54 (m, 2H), 7.48–7.50 (m, 2H), 7.43–7.46 (m, 2H);  $^{13}\text{C NMR}$  (125 MHz,  $\text{CDCl}_3$ ):  $\delta$  136.4, 134.4, 132.1 (q,  $J = 33.4$  Hz), 130.0, 127.8 (q,  $J = 3.6$  Hz), 124.5 (q,  $J = 3.5$  Hz), 123.7 (q,  $J = 270.6$  Hz);  $^{19}\text{F NMR}$  (470 MHz,  $\text{CDCl}_3$ ):  $\delta$  -62.1. MS (EI):  $m/z$  (%): 323 (15), 322 (100) [ $M^+$ ], 303 (12), 301 (15), 233 (32), 184 (12).<sup>S13</sup>

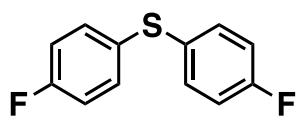

**bis(4-fluorophenyl)sulfide** (CAS No. 405-31-2, **1i**). 84% isolated yield.  $^1\text{H NMR}$  (500 MHz,  $\text{CDCl}_3$ ):  $\delta$  7.28–7.32 (m, 4H), 6.98–7.03 (m, 4H);  $^{13}\text{C NMR}$  (125 MHz,  $\text{CDCl}_3$ ):  $\delta$  162.2 (d,  $J = 246.8$  Hz), 133.0 (d,  $J = 7.1$  Hz), 131.1 (d,  $J = 3.6$  Hz), 116.4 (d,  $J = 22.8$  Hz);  $^{19}\text{F NMR}$  (470 MHz,  $\text{CDCl}_3$ ):  $\delta$  -113.6. MS (EI):  $m/z$  (%): 224 (5), 223 (16), 222 (100) [ $M^+$ ], 221 (49), 220 (20), 202 (18), 201 (15), 83 (23), 75 (14).<sup>S13</sup>

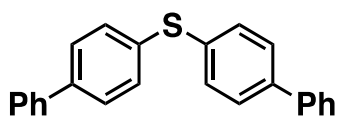

**4-([1,1'-biphenyl]-4-ylthio)-1,1'-biphenyl** (CAS No. 64554-57-0, **1k**). 72% isolated yield.  $^1\text{H}$  NMR (500 MHz,  $\text{CDCl}_3$ ):  $\delta$  7.54–7.59 (m, 8H), 7.42–7.46 (m, 8H), 7.34–7.37 (m, 2H);  $^{13}\text{C}$  NMR (125 MHz,  $\text{CDCl}_3$ ):  $\delta$  140.3, 140.1, 134.8, 131.4, 128.9, 127.9, 127.5, 127.0. MS (EI):  $m/z$  (%): 340 (8), 339 (26), 338 (100) [ $M^+$ ], 337 (9), 321 (5), 306 (7), 261 (8), 260 (5), 184 (8), 169 (6), 152 (15), 115 (5).<sup>S13</sup>

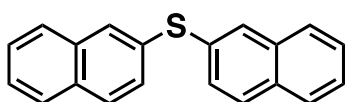

**2-naphthylsulfide** (CAS No. 613-81-0, **1l**). 78% isolated yield.  $^1\text{H}$  NMR (500 MHz,  $\text{CDCl}_3$ ):  $\delta$  7.87 (m, 2H), 7.71–7.81 (m, 6H), 7.42–7.49 (m, 6H);  $^{13}\text{C}$  NMR (125 MHz,  $\text{CDCl}_3$ ):  $\delta$  134.0, 133.2, 132.5, 129.9, 129.0, 128.8, 127.9, 127.6, 126.8, 126.4. MS (EI):  $m/z$  (%): 287 (23), 286 (100) [ $M^+$ ], 285 (54), 284 (28), 253 (20), 252 (27), 143 (10), 142 (14), 126 (14), 115 (12).<sup>S13</sup>

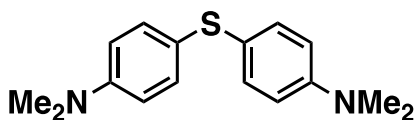

**4,4'-thiobis[N,N-dimethylbenzenamine]** (CAS No. 13604-44-9, **1n**). >99% isolated yield.  $^1\text{H}$  NMR (500 MHz,  $\text{CDCl}_3$ ):  $\delta$  7.22–7.25 (m, 4H), 6.63–6.66 (m, 4H), 2.92 (s, 12H);  $^{13}\text{C}$  NMR (125 MHz,  $\text{CDCl}_3$ ):  $\delta$  149.6, 132.6, 123.0, 113.1, 40.5. MS (EI):  $m/z$  (%): 273 (19), 272 (100) [ $M^+$ ], 241 (19), 240 (88), 225 (18), 224 (13), 152 (19), 136 (17), 120 (15), 119 (11).<sup>S13</sup>

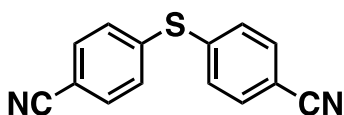

**4,4'-thiobis[benzonitrile]** (CAS No. 46836-99-1, **1o**). 53% isolated yield.  $^1\text{H}$  NMR (500 MHz,  $\text{CDCl}_3$ ):  $\delta$  7.61–7.63 (m, 4H), 7.41–7.43 (m, 4H);  $^{13}\text{C}$  NMR (125 MHz,  $\text{CDCl}_3$ ):  $\delta$  140.6, 133.0, 131.2, 118.2, 111.4. MS (EI):  $m/z$  (%): 237 (18), 236 (100) [ $M^+$ ], 235 (46), 209 (15), 208 (18), 75 (12).<sup>S13</sup>

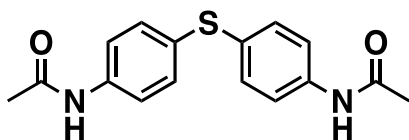

***N,N'*-(thiodi-4,1-phenylene)bis[acetamide]** (CAS No. 7355-56-8, **1q**). >99% isolated yield. <sup>1</sup>H NMR (500 MHz, dimethyl sulfoxide-*d*<sub>6</sub>): δ 10.11 (s, 2H), 7.56–7.59 (m, 4H), 7.22–7.25 (m, 4H), 2.03 (s, 6H); <sup>13</sup>C NMR (125 MHz, dimethyl sulfoxide-*d*<sub>6</sub>): δ 168.4, 138.7, 131.4, 128.6, 119.9, 24.0. MS (EI): *m/z* (%): 301 (21), 300 (100) [*M*<sup>+</sup>], 259 (10), 258 (52), 217 (21), 216 (71), 215 (15), 184 (22), 183 (11), 124 (17).<sup>S13</sup>

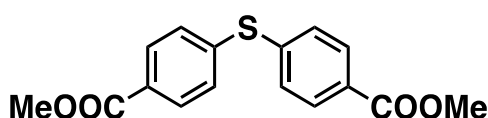

**1,1'-dimethyl-4,4'-thiobis[benzoate]** (CAS No. 14387-31-6, **1r**). 45% isolated yield. <sup>1</sup>H NMR (500 MHz, CDCl<sub>3</sub>): δ 7.96–8.00 (m, 4H), 7.37–7.40 (m, 4H), 3.92 (s, 6H); <sup>13</sup>C NMR (125 MHz, CDCl<sub>3</sub>): δ 166.5, 140.8, 130.5, 130.4, 129.1, 52.3. MS (EI): *m/z* (%): 303 (18), 302 (100) [*M*<sup>+</sup>], 272 (17), 271 (93), 184 (40), 120 (19), 92 (15).<sup>S13</sup>

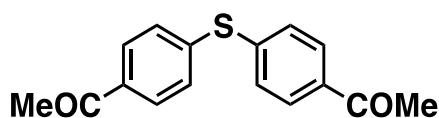

**1,1'-(thiodi-4,1-phenylene)bis[ethanone]** (CAS No. 2615-09-0, **1s**). 35% isolated yield. <sup>1</sup>H NMR (500 MHz, CDCl<sub>3</sub>): δ 7.88–7.91 (m, 4H), 7.39–7.42 (m, 4H), 2.59 (s, 6H); <sup>13</sup>C NMR (125 MHz, CDCl<sub>3</sub>): δ 197.1, 141.0, 135.9, 130.6, 129.2, 26.6. MS (EI): *m/z* (%): 271 (11), 270 (59) [*M*<sup>+</sup>], 256 (17), 255 (100), 185 (13), 184 (18), 120 (11).<sup>S13</sup>

## Spectral Data of Products

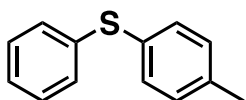

**phenyl *p*-tolyl sulfide** (CAS No. 3699-01-2, **1ab**): 77% GC yield. GC conditions and analysis: InertCap5 capillary column, 0.25 mm × 60 m, GL Science Inc.; carrier gas (N<sub>2</sub>) flow rate, 1.7 mL·min<sup>-1</sup>; initial column temp., 80 °C final column temp., 280 °C, progress rate, 20 °C·min<sup>-1</sup> (10 min), 280 °C for 10 min, injection temp., 280 °C detection temp., 280 °C; retention time, 10.3 min; relative sensitivity for quantification (vs naphthalene, internal standard), 1.43 (calculated by calibration curve). MS (EI): *m/z* (%): 202 (5), 201 (16), 200 (100) [*M*<sup>+</sup>], 199 (26), 186 (6), 185 (37), 184 (33), 167 (12), 165 (8), 152 (7), 99 (12), 91 (24), 77 (9), 65 (12), 51 (9), 45 (5), 39 (7).<sup>S13</sup>

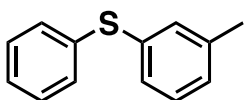

**phenyl *m*-tolyl sulfide** (CAS No. 13865-48-0, **1ac**): 78% GC yield. GC conditions and analysis: InertCap5 capillary column, 0.25 mm × 60 m, GL Science Inc.; carrier gas (N<sub>2</sub>) flow rate, 1.7 mL·min<sup>-1</sup>; initial column temp., 80 °C final column temp., 280 °C, progress rate, 20 °C·min<sup>-1</sup> (10 min), 280 °C for 10 min, injection temp., 280 °C detection temp., 280 °C; retention time, 10.2 min; relative sensitivity for quantification (vs naphthalene, internal standard), 1.43 (estimated to be equal to that of **1ab**). MS (EI): *m/z* (%): 202 (5), 201 (15), 200 (100) [*M*<sup>+</sup>], 199 (24), 186 (8), 185 (44), 184 (41), 167 (6), 165 (8), 152 (8), 99 (12), 91 (10), 77 (9), 65 (17), 63 (5), 51 (11).<sup>S13</sup>

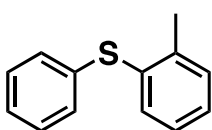

**phenyl *o*-tolyl sulfide** (CAS No. 13963-35-4, **1ad**): 71% GC yield. GC conditions and analysis: InertCap5 capillary column, 0.25 mm × 60 m, GL Science Inc.; carrier gas (N<sub>2</sub>) flow rate, 1.7 mL·min<sup>-1</sup>; initial column temp., 80 °C final column temp., 280 °C, progress rate, 20 °C·min<sup>-1</sup> (10 min), 280 °C for 10 min, injection temp., 280 °C detection temp., 280 °C; retention time, 10.1 min; relative sensitivity for quantification (vs naphthalene, internal standard), 1.43 (estimated to be equal to that of **1ab**). MS (EI): *m/z* (%): 202 (6), 201 (16), 200 (100) [*M*<sup>+</sup>], 199 (12), 197 (5), 185 (22), 184 (18), 167 (10), 166 (5), 165 (13), 152 (7), 123 (6), 122 (38), 121 (26), 99 (13), 91 (27), 89 (9), 78 (8), 77 (10), 65 (18), 63 (6), 51 (12).<sup>S13</sup>

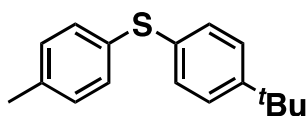

**1-(1,1-dimethylethyl)-4-[(4-methylphenyl)thio]benzene** (CAS No. 875713-05-6, **1be**): 79% GC yield. GC conditions and analysis: InertCap5 capillary column, 0.25 mm × 60 m, GL Science Inc.; carrier gas (N<sub>2</sub>) flow rate, 1.7 mL·min<sup>-1</sup>; initial column temp., 80 °C final column temp., 280 °C, progress rate, 20 °C·min<sup>-1</sup> (10 min), 280 °C for 10 min, injection temp., 280 °C detection temp., 280 °C; retention time, 12.4 min; relative sensitivity for quantification (vs 1,3,5-trimethoxybenzene, internal standard), 2.77 (estimated by **1ab** and the effective carbon number concept). MS (EI): *m/z* (%): 257 (10), 256 (50) [*M*<sup>+</sup>], 243 (6), 242 (18), 241 (100), 213 (7), 163 (5), 123 (21), 118 (6), 117 (11), 115 (6), 106 (9), 105 (5), 91 (8), 79 (5).<sup>S13</sup>

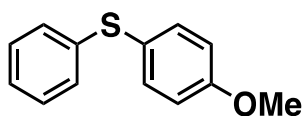

**1-methoxy-4-(phenylthio)benzene** (CAS No. 5633-57-8, **1af**): 78% GC yield (81% isolated yield). GC conditions and analysis: InertCap5 capillary column, 0.25 mm × 60 m, GL Science Inc.; carrier gas (N<sub>2</sub>) flow rate, 1.7 mL·min<sup>-1</sup>; initial column temp., 80 °C final column temp., 280 °C, progress rate, 20 °C·min<sup>-1</sup> (10 min), 280 °C for 10 min, injection temp., 280 °C detection temp., 280 °C; retention time, 12.0 min; relative sensitivity for quantification (vs naphthalene, internal standard), 1.33 (estimated by **1ab** and the effective carbon number concept). <sup>1</sup>H NMR (500 MHz, CDCl<sub>3</sub>): δ 7.38–7.43 (m, 2H), 7.19–7.25 (m, 2H), 7.10–7.18 (m, 3H), 6.86–6.91 (m, 2H), 3.81 (s, 3H); <sup>13</sup>C NMR (125 MHz, CDCl<sub>3</sub>): δ 159.8, 138.6, 135.3, 128.9, 128.2, 125.7, 124.3, 115.0, 55.4. MS (EI): *m/z* (%): 218 (6), 217 (15), 216 (100) [*M*<sup>+</sup>], 215 (11), 202 (8), 201 (55), 200 (5), 185 (8), 184 (7), 173 (8), 172 (5), 171 (8), 139 (5), 129 (15), 128 (6), 77 (10), 51 (9).<sup>S13</sup>

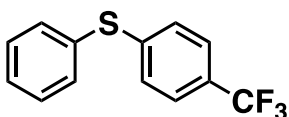

**1-(phenylthio)-4-(trifluoromethyl)benzene** (CAS No. 53451-90-4, **1ag**): 75% GC yield. GC conditions and analysis: InertCap5 capillary column, 0.25 mm × 60 m, GL Science Inc.; carrier gas (N<sub>2</sub>) flow rate, 1.7 mL·min<sup>-1</sup>; initial column temp., 80 °C final column temp., 280 °C, progress rate, 10 °C·min<sup>-1</sup> (20 min), 280 °C for 10 min, injection temp., 280 °C detection temp., 280 °C; retention time, 14.1 min; relative sensitivity for quantification (vs naphthalene, internal standard), 1.33 (estimated by **1ab** and the effective carbon number concept). MS (EI): *m/z* (%): 256 (6), 255 (15), 254

(100) [ $M^+$ ], 253 (15), 235 (7), 233 (23), 186 (6), 185 (36), 184 (28), 109 (5), 77 (14), 69 (6), 65 (6), 51 (17), 50 (5).<sup>S13</sup>

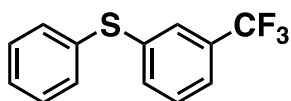

**1-(phenylthio)-3-(trifluoromethyl)benzene** (CAS No. 2715-07-3, **1ah**): 72% GC yield. GC conditions and analysis: InertCap5 capillary column, 0.25 mm  $\times$  60 m, GL Science Inc.; carrier gas ( $N_2$ ) flow rate, 1.7 mL $\cdot$ min $^{-1}$ ; initial column temp., 80  $^\circ$ C final column temp., 280  $^\circ$ C, progress rate, 10  $^\circ$ C $\cdot$ min $^{-1}$  (20 min), 280  $^\circ$ C for 10 min, injection temp., 280  $^\circ$ C detection temp., 280  $^\circ$ C; retention time, 13.8 min; relative sensitivity for quantification (vs naphthalene, internal standard), 1.33 (estimated by **1ab** and the effective carbon number concept). MS (EI):  $m/z$  (%): 256 (6), 255 (16), 254 (100) [ $M^+$ ], 253 (13), 235 (6), 234 (6), 233 (25), 186 (5), 185 (31), 184 (25), 109 (5), 77 (15), 65 (6), 51 (16).<sup>S13</sup>

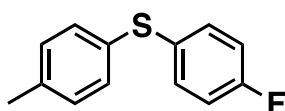

**1-fluoro-4-[(4-methylphenyl)thio]benzene** (CAS No. 42917-47-5, **1bi**): 81% GC yield. GC conditions and analysis: InertCap5 capillary column, 0.25 mm  $\times$  60 m, GL Science Inc.; carrier gas ( $N_2$ ) flow rate, 1.7 mL $\cdot$ min $^{-1}$ ; initial column temp., 80  $^\circ$ C final column temp., 280  $^\circ$ C, progress rate, 20  $^\circ$ C $\cdot$ min $^{-1}$  (10 min), 280  $^\circ$ C for 10 min, injection temp., 280  $^\circ$ C detection temp., 280  $^\circ$ C; retention time, 10.1 min; relative sensitivity for quantification (vs dodecane, internal standard), 1.06 (estimated by **1ab** and the effective carbon number concept). MS (EI):  $m/z$  (%): 220 (5), 219 (15), 218 (100) [ $M^+$ ], 217 (22), 204 (5), 203 (32), 202 (26), 185 (17), 183 (10), 108 (11), 98 (6), 91 (27), 83 (6), 77 (5), 65 (13), 63 (5).<sup>S13</sup>

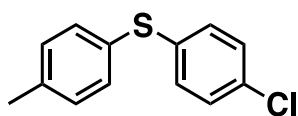

**1-chloro-4-[(4-methylphenyl)thio]benzene** (CAS No. 22865-55-0, **1bj**): 78% GC yield. GC conditions and analysis: InertCap5 capillary column, 0.25 mm  $\times$  60 m, GL Science Inc.; carrier gas ( $N_2$ ) flow rate, 1.7 mL $\cdot$ min $^{-1}$ ; initial column temp., 80  $^\circ$ C final column temp., 280  $^\circ$ C, progress rate, 20  $^\circ$ C $\cdot$ min $^{-1}$  (10 min), 280  $^\circ$ C for 10 min, injection temp., 280  $^\circ$ C detection temp., 280  $^\circ$ C; retention time, 11.4 min; relative sensitivity for quantification (vs naphthalene, internal standard), 1.41 (estimated by **1ab** and the effective carbon number concept). MS (EI):  $m/z$  (%): 237 (5), 236 (36), 235

(17), 234 (100) [ $M^+$ ], 233 (8), 219 (7), 201 (14), 200 (6), 199 (31), 198 (17), 197 (10), 185 (6), 184 (43), 166 (7), 165 (10), 116 (5), 108 (6), 99 (7), 98 (13), 91 (29), 89 (5), 77 (7), 75 (5), 65 (15), 63 (7), 51 (5), 45 (7), 39 (8).<sup>S14</sup>

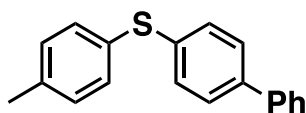

**4-[(4-methylphenyl)thio]-1,1'-biphenyl** (CAS No. 1361950-30-2, **1bk**): 63% GC yield (55% isolated yield). GC conditions and analysis: InertCap5 capillary column, 0.25 mm  $\times$  60 m, GL Science Inc.; carrier gas ( $N_2$ ) flow rate, 1.7 mL $\cdot$ min $^{-1}$ ; initial column temp., 80  $^\circ$ C final column temp., 280  $^\circ$ C, progress rate, 20  $^\circ$ C $\cdot$ min $^{-1}$  (10 min), 280  $^\circ$ C for 10 min, injection temp., 280  $^\circ$ C detection temp., 280  $^\circ$ C; retention time, 17.0 min; relative sensitivity for quantification (vs 1,3,5-trimethoxybenzene, internal standard), 3.10 (estimated by **1ab** and the effective carbon number concept).  $^1$ H NMR (500 MHz,  $CDCl_3$ ):  $\delta$  7.52–7.56 (m, 2H), 7.46–7.50 (m, 2H), 7.38–7.43 (m, 2H), 7.29–7.36 (m, 5H), 7.12–7.17 (m, 2H), 2.34 (s, 3H);  $^{13}$ C NMR (125 MHz,  $CDCl_3$ ):  $\delta$  140.4, 139.3, 137.7, 136.3, 132.4, 131.2, 130.1, 130.0, 128.8, 127.7, 127.3, 126.9, 21.1. MS (EI):  $m/z$  (%): 278 (7), 277 (22), 276 (100) [ $M^+$ ], 275 (14), 261 (20), 260 (16), 244 (5), 243 (5), 228 (6), 184 (8), 152 (12), 115 (5), 91 (9), 77(5), 65 (5).<sup>S13</sup>

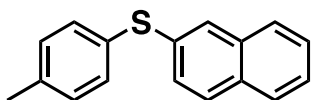

**2-[(4-methylphenyl)thio]naphthalene** (CAS No. 52258-16-9, **1bl**): 90% GC yield (57% isolated yield). GC conditions and analysis: InertCap5 capillary column, 0.25 mm  $\times$  60 m, GL Science Inc.; carrier gas ( $N_2$ ) flow rate, 1.7 mL $\cdot$ min $^{-1}$ ; initial column temp., 80  $^\circ$ C final column temp., 280  $^\circ$ C, progress rate, 20  $^\circ$ C $\cdot$ min $^{-1}$  (10 min), 280  $^\circ$ C for 10 min, injection temp., 280  $^\circ$ C detection temp., 280  $^\circ$ C; retention time, 14.6 min; relative sensitivity for quantification (vs 1,3,5-trimethoxybenzene, internal standard), 2.74 (estimated by **1ab** and the effective carbon number concept).  $^1$ H NMR (500 MHz,  $CDCl_3$ ):  $\delta$  7.67–7.79 (m, 4H), 7.40–7.47 (m, 2H), 7.30–7.37 (m, 3H), 7.12–7.16 (m, 2H), 2.35 (s, 3H);  $^{13}$ C NMR (125 MHz,  $CDCl_3$ ):  $\delta$  137.6, 134.3, 133.8, 132.1, 132.0, 131.4, 130.1, 128.7, 128.4, 127.9, 127.7, 127.4, 126.5, 125.9, 21.1. MS (EI):  $m/z$  (%): 252 (6), 251 (20), 250 (100) [ $M^+$ ], 249 (19), 236 (8), 235 (39), 234 (38), 217 (8), 215 (8), 202 (13), 127 (5), 126 (5), 125 (5), 124 (10), 117 (8), 115 (12), 91 (6), 77 (5).<sup>S14</sup>



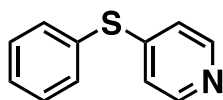

**4-(phenylthio)pyridine** (CAS No. 33399-48-3, **1a**): 26% GC yield. GC conditions and analysis: InertCap5 capillary column, 0.25 mm × 60 m, GL Science Inc.; carrier gas (N<sub>2</sub>) flow rate, 1.7 mL·min<sup>-1</sup>; initial column temp., 80 °C final column temp., 280 °C, progress rate, 20 °C·min<sup>-1</sup> (10 min), 280 °C for 10 min, injection temp., 280 °C detection temp., 280 °C; retention time, 10.1 min; relative sensitivity for quantification (vs 1,3,5-trimethoxybenzene, internal standard), 1.65 (calculated by calibration curve). <sup>1</sup>H NMR (500 MHz, CDCl<sub>3</sub>): δ 8.33–8.36 (m, 2H), 7.54–7.58 (m, 2H), 7.44–7.48 (m, 3H), 6.92–6.95 (m, 2H); <sup>13</sup>C NMR (125 MHz, CDCl<sub>3</sub>): δ 150.3, 149.5, 135.2, 129.9, 129.7, 129.4, 120.8. MS (EI): *m/z* (%): 189 (5), 188 (16), 187 (100) [*M*<sup>+</sup>], 186 (73), 160 (7), 154 (7), 115 (15), 109 (6), 92 (5), 78 (8), 77 (9), 65 (6), 51 (34), 50 (5), 39 (6).<sup>S13</sup>

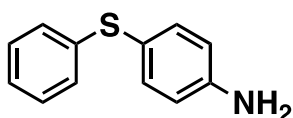

**4-(phenylthio)benzenamine** (CAS No. 1135-14-4, **1a**): 75% GC yield (80% isolated yield). GC conditions and analysis: InertCap5 capillary column, 0.25 mm × 60 m, GL Science Inc.; carrier gas (N<sub>2</sub>) flow rate, 1.7 mL·min<sup>-1</sup>; initial column temp., 80 °C final column temp., 280 °C, progress rate, 20 °C·min<sup>-1</sup> (10 min), 280 °C for 10 min, injection temp., 280 °C detection temp., 280 °C; retention time, 12.1 min; relative sensitivity for quantification (vs naphthalene, internal standard), 1.30 (estimated by **1ab** and the effective carbon number concept). <sup>1</sup>H NMR (500 MHz, CDCl<sub>3</sub>): δ 7.28–7.33 (m, 2H), 7.17–7.22 (m, 2H), 7.06–7.14 (m, 3H), 6.63–6.68 (m, 2H), 3.68 (brs, 2H); <sup>13</sup>C NMR (125 MHz, CDCl<sub>3</sub>): δ 147.0, 139.7, 136.1, 128.8, 127.3, 125.2, 120.4, 115.9. MS (EI): *m/z* (%): 203 (5), 202 (16), 201 (100) [*M*<sup>+</sup>], 200 (53), 199 (8), 184 (6), 169 (19), 168 (5), 167 (5), 124 (16), 99 (5), 80 (17), 65 (8), 51 (7), 39 (6).<sup>S13</sup>

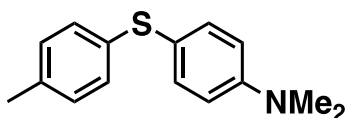

***N,N*-dimethyl-4-[(4-methylphenyl)thio]benzenamine** (CAS No. 2849-63-2, **1bo**): 63% GC yield (23% isolated yield). GC conditions and analysis: InertCap5 capillary column, 0.25 mm × 60 m, GL Science Inc.; carrier gas (N<sub>2</sub>) flow rate, 1.7 mL·min<sup>-1</sup>; initial column temp., 80 °C final column temp., 280 °C, progress rate, 20 °C·min<sup>-1</sup> (10 min), 280 °C for 10 min, injection temp., 280 °C detection temp., 280 °C; retention time, 13.6 min; relative sensitivity for quantification (vs 1,3,5-trimethoxybenzene, internal standard), 2.39 (estimated by **1ab** and the effective carbon number

concept).  $^1\text{H}$  NMR (500 MHz,  $\text{CDCl}_3$ ):  $\delta$  7.33–7.38 (m, 2H), 7.00–7.07 (m, 4H), 6.66–6.70 (m, 2H), 2.96 (s, 6H), 2.27 (s, 3H);  $^{13}\text{C}$  NMR (125 MHz,  $\text{CDCl}_3$ ):  $\delta$  150.4, 136.2, 135.5, 135.1, 129.4, 127.8, 118.7, 113.0, 40.3, 20.9. MS (EI):  $m/z$  (%): 245 (6), 244 (18), 243 (100) [ $M^+$ ], 242 (14), 228 (8), 227 (10), 226 (6), 212 (12), 211 (38), 210 (33), 195 (9), 184 (10), 152 (11), 136 (5), 121 (7), 120 (6), 105 (5), 91 (5), 77 (5), 65 (5).<sup>S13</sup>

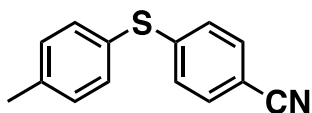

**4-[(4-methylphenyl)thio]benzonitrile** (CAS No. 104128-50-9, **1bp**): 80% GC yield (79% isolated yield). GC conditions and analysis: InertCap5 capillary column, 0.25 mm  $\times$  60 m, GL Science Inc.; carrier gas ( $\text{N}_2$ ) flow rate, 1.7  $\text{mL}\cdot\text{min}^{-1}$ ; initial column temp., 80  $^\circ\text{C}$  final column temp., 280  $^\circ\text{C}$ , progress rate, 20  $^\circ\text{C}\cdot\text{min}^{-1}$  (10 min), 280  $^\circ\text{C}$  for 10 min, injection temp., 280  $^\circ\text{C}$  detection temp., 280  $^\circ\text{C}$ ; retention time, 12.7 min; relative sensitivity for quantification (vs 1,3,5-trimethoxybenzene, internal standard), 2.17 (calculated by calibration curve).  $^1\text{H}$  NMR (500 MHz,  $\text{CDCl}_3$ ):  $\delta$  7.43–7.47 (m, 2H), 7.39–7.43 (m, 2H), 7.22–7.26 (m, 2H), 7.09–7.14 (m, 2H), 2.40 (s, 3H);  $^{13}\text{C}$  NMR (125 MHz,  $\text{CDCl}_3$ ):  $\delta$  146.6, 139.9, 134.9, 132.3, 130.7, 126.8, 126.7, 118.9, 108.3, 22.0. MS (EI):  $m/z$  (%): 227 (6), 226 (17), 225 (100) [ $M^+$ ], 224 (23), 211 (5), 210 (32), 209 (18), 192 (22), 190 (6), 165 (5), 111 (10), 91 (39), 89 (6), 77 (8), 65 (19), 63 (8), 51 (6).<sup>S13</sup>

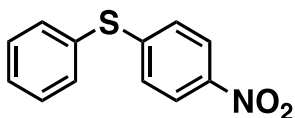

**4-nitrophenyl phenyl sulfide** (CAS No. 1952-97-6, **1aq**): 89% GC yield (93% isolated yield). GC conditions and analysis: InertCap5 capillary column, 0.25 mm  $\times$  60 m, GL Science Inc.; carrier gas ( $\text{N}_2$ ) flow rate, 1.7  $\text{mL}\cdot\text{min}^{-1}$ ; initial column temp., 80  $^\circ\text{C}$  final column temp., 280  $^\circ\text{C}$ , progress rate, 20  $^\circ\text{C}\cdot\text{min}^{-1}$  (10 min), 280  $^\circ\text{C}$  for 10 min, injection temp., 280  $^\circ\text{C}$  detection temp., 280  $^\circ\text{C}$ ; retention time, 12.6 min; relative sensitivity for quantification (vs naphthalene, internal standard), 1.22 (estimated by **1ab** and the effective carbon number concept).  $^1\text{H}$  NMR (500 MHz,  $\text{CDCl}_3$ ):  $\delta$  8.03–8.09 (m, 2H), 7.51–7.57 (m, 2H), 7.43–7.48 (m, 3H), 7.15–7.20 (m, 2H);  $^{13}\text{C}$  NMR (125 MHz,  $\text{CDCl}_3$ ):  $\delta$  148.5, 145.3, 134.7, 130.4, 130.0, 129.7, 126.7, 124.0. MS (EI):  $m/z$  (%): 233 (6), 232 (14), 231 (100) [ $M^+$ ], 201 (20), 186 (5), 185 (17), 184 (64), 183 (5), 152 (13), 139 (6), 115 (6), 109 (6), 92 (6), 77 (6), 69 (6), 65 (8), 51 (8), 50 (5), 45 (7).<sup>S13</sup>

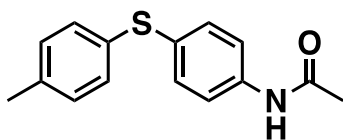

**N-[4-[(4-methylphenyl)thio]phenyl]acetamide** (CAS No. 339096-10-5, **1br**): 64% GC yield (53% isolated yield). GC conditions and analysis: InertCap5 capillary column, 0.25 mm × 60 m, GL Science Inc.; carrier gas (N<sub>2</sub>) flow rate, 1.7 mL·min<sup>-1</sup>; initial column temp., 80 °C final column temp., 280 °C, progress rate, 20 °C·min<sup>-1</sup> (10 min), 280 °C for 10 min, injection temp., 280 °C detection temp., 280 °C; retention time, 16.6 min; relative sensitivity for quantification (vs 1,3,5-trimethoxybenzene, internal standard), 2.54 (estimated by **1ab** and the effective carbon number concept). <sup>1</sup>H NMR (500 MHz, CDCl<sub>3</sub>): δ 7.70 (brs, 1H), 7.40–7.46 (m, 2H), 7.23–7.28 (m, 2H), 7.19–7.23 (m, 2H), 7.07–7.12 (m, 2H), 2.31 (s, 3H), 2.14 (s, 3H); <sup>13</sup>C NMR (125 MHz, CDCl<sub>3</sub>): δ 168.6, 137.1, 136.9, 132.3, 131.7, 131.4, 131.1, 130.0, 120.7, 24.5, 21.1. MS (EI): *m/z* (%): 259 (6), 258 (18), 257 (100) [*M*<sup>+</sup>], 217 (5), 216 (17), 215 (78), 214 (26), 200 (23), 199 (10), 184 (5), 183 (18), 182 (8), 124 (7), 91 (6), 65 (8).<sup>S13</sup>

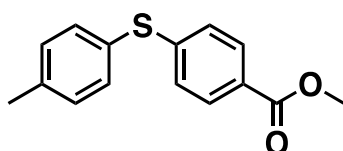

**methyl 4-[(4-methylphenyl)thio]benzoate** (CAS No. 1818399-49-3, **1bs**): 80% GC yield (62% isolated yield). GC conditions and analysis: InertCap5 capillary column, 0.25 mm × 60 m, GL Science Inc.; carrier gas (N<sub>2</sub>) flow rate, 1.7 mL·min<sup>-1</sup>; initial column temp., 80 °C final column temp., 280 °C, progress rate, 20 °C·min<sup>-1</sup> (10 min), 280 °C for 10 min, injection temp., 280 °C detection temp., 280 °C; retention time, 13.3 min; relative sensitivity for quantification (vs 1,3,5-trimethoxybenzene, internal standard), 2.27 (estimated by **1ab** and the effective carbon number concept). <sup>1</sup>H NMR (500 MHz, CDCl<sub>3</sub>): δ 7.85–7.88 (m, 2H), 7.38–7.42 (m, 2H), 7.19–7.23 (m, 2H), 7.12–7.16 (m, 2H), 3.88 (s, 3H), 2.39 (s, 3H); <sup>13</sup>C NMR (125 MHz, CDCl<sub>3</sub>): δ 166.7, 145.4, 139.2, 134.4, 130.5, 130.0, 128.1, 127.0, 126.7, 52.0, 21.3. MS (EI): *m/z* (%): 260 (6), 259 (16), 258 (100) [*M*<sup>+</sup>], 228 (10), 227 (59), 225 (5), 199 (20), 198 (7), 197 (7), 185 (6), 184 (43), 165 (5), 113 (5), 91 (9), 79 (5), 77 (5), 65 (6).<sup>S13</sup>

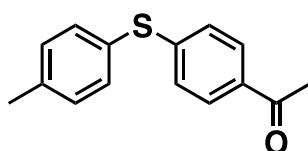

**1-[4-[(4-methylphenyl)thio]phenyl]ethanone** (CAS No. 99433-27-9, **1bt**): 80% GC yield (71% isolated yield) (The isolated yield was shown after the subtraction of the amounts of residual solvents calculated from <sup>1</sup>H NMR). GC conditions and analysis: InertCap5 capillary column, 0.25 mm × 60 m,

GL Science Inc.; carrier gas (N<sub>2</sub>) flow rate, 1.7 mL·min<sup>-1</sup>; initial column temp., 80 °C final column temp., 280 °C, progress rate, 20 °C·min<sup>-1</sup> (10 min), 280 °C for 10 min, injection temp., 280 °C detection temp., 280 °C; retention time, 12.4 min; relative sensitivity for quantification (vs 1,3,5-trimethoxybenzene, internal standard), 2.27 (calculated by calibration curve). <sup>1</sup>H NMR (500 MHz, CDCl<sub>3</sub>): δ 7.77–7.81 (m, 2H), 7.38–7.43 (m, 2H), 7.20–7.24 (m, 2H), 7.13–7.17 (m, 2H), 2.53 (s, 3H), 2.39 (s, 3H); <sup>13</sup>C NMR (125 MHz, CDCl<sub>3</sub>): δ 197.1, 145.9, 139.3, 134.5, 134.1, 130.5, 128.8, 127.9, 126.7, 26.4, 21.3. MS (EI): *m/z* (%): 243 (12), 242 (72) [*M*<sup>+</sup>], 229 (6), 228 (16), 227 (100), 199 (9), 197 (6), 185 (7), 184 (47), 165 (6), 152 (5), 113 (5), 79 (5), 77 (5), 65 (6).<sup>S14</sup>

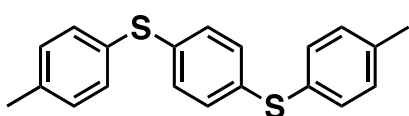

**1,4-bis[(4-methylphenyl)thio]benzene** (CAS No. 55709-45-0, **1bab**): 29% GC yield. GC conditions and analysis: InertCap5 capillary column, 0.25 mm × 60 m, GL Science Inc.; carrier gas (N<sub>2</sub>) flow rate, 1.7 mL·min<sup>-1</sup>; initial column temp., 80 °C final column temp., 280 °C, progress rate, 20 °C·min<sup>-1</sup> (10 min), 280 °C for 20 min, injection temp., 280 °C detection temp., 280 °C; retention time, 22.4 min; relative sensitivity for quantification (vs 1,3,5-trimethoxybenzene, internal standard), 3.20 (estimated by **1ab** and the effective carbon number concept). MS (EI): *m/z* (%): 324 (12), 323 (23), 322 (100) [*M*<sup>+</sup>], 201 (5), 200 (13), 199 (86), 198 (9), 197 (13), 184 (23), 166 (7), 165 (8), 91 (7), 65 (8).<sup>S13</sup>

### **Supplementary References**

- (S1) J. W. Cook Jr. and D. E. Sayers, *J. Appl. Phys.*, 1981, **52**, 5024.
- (S2) A. L. Ankudinov and J. J. Rehr, *Phys. Rev. B*, 1997, **56**, R1712.
- (S3) Y. Sakamoto, F. L. Chen and R. McNicholl, *J. Alloys Compd.*, 1993, **192**, 145.
- (S4) A. G. Christy and S. M. Clark, *Phys. Rev. B*, 1995, **52**, 9259.
- (S5) M. Ellner, K. Kolatschek and B. Predel, *J. Less-Common Met.*, 1991, **170**, 171.
- (S6) (a) R. N. Dhital, C. Kamonsatikul, E. Somsook, K. Bobuatong, M. Ehara, S. Karanjit and H. Sakurai, *J. Am. Chem. Soc.*, 2012, **134**, 20250; (b) X.-F. Lang, P.-G. Yin, T.-T. You and L. Guo, *ChemPhysChem*, 2012, **13**, 237.
- (S7) (a) R. Miyazaki, X. Jin, D. Yoshii, T. Yatabe, T. Yabe, N. Mizuno, K. Yamaguchi and J. Hasegawa, *Catal. Sci. Technol.*, 2021, **11**, 3333; (b) D. Takei, T. Yatabe, T. Yabe, R. Miyazaki, J. Hasegawa and K. Yamaguchi, *JACS Au*, 2022, **2**, 394.
- (S8) H. Cao, X. Liu, F. Bie, Y. Shi, Y. Han, P. Yan, M. Szostak and C. Liu, *J. Org. Chem.*, 2021, **86**, 10829.
- (S9) T. Matsuyama, T. Yatabe and K. Yamaguchi, *Org. Biomol. Chem.*, 2024, **22**, 579.
- (S10) P. Zhao, H. Yin, H. Gao and C. Xi, *J. Org. Chem.*, 2013, **78**, 5001.
- (S11) P. An, Z.-F. Shi, W. Dou, X.-P. Cao and H.-L. Zhang, *Org. Lett.*, 2010, **12**, 4364.
- (S12) B. Wang, C. Jiang, J. Qian, S. Zhang, X. Jia and Y. Yuan, *Org. Biomol. Chem.*, 2018, **16**, 101.
- (S13) T. Matsuyama, T. Yatabe, T. Yabe and K. Yamaguchi, *Catal. Sci. Technol.*, 2024, **14**, 76.
- (S14) D. Liu, H.-X. Ma, P. Fang and T.-S. Mei, *Angew. Chem. Int. Ed.*, 2019, **58**, 5033.

## Supplementary Figures

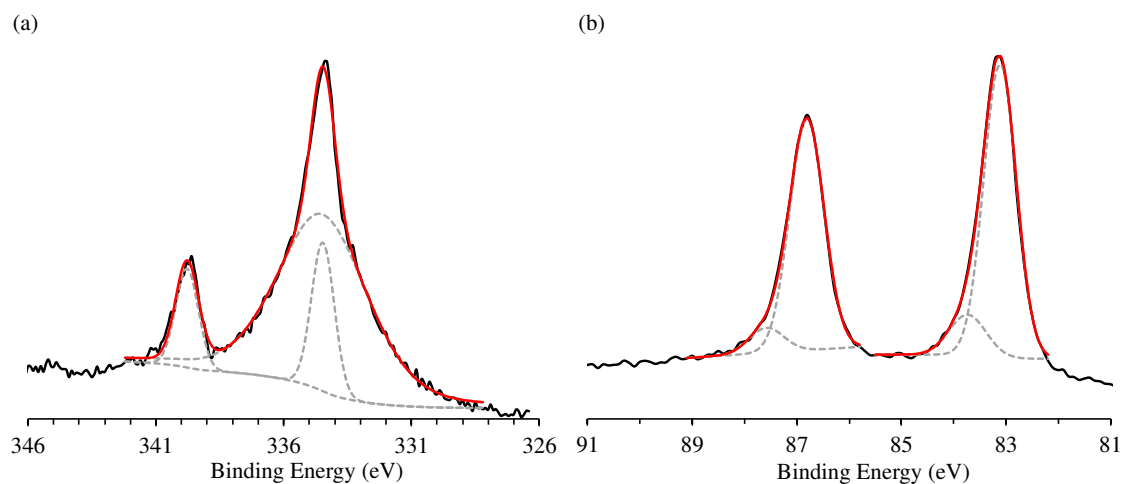

**Fig. S1** (a) Pd 3d and (b) Au 4f XPS spectra of Au<sub>4.4</sub>-Pd<sub>1</sub>/TiO<sub>2</sub>. Gray broken lines and red broken lines indicate the deconvoluted signals and the sum of these lines. Black lines indicate the data plots.

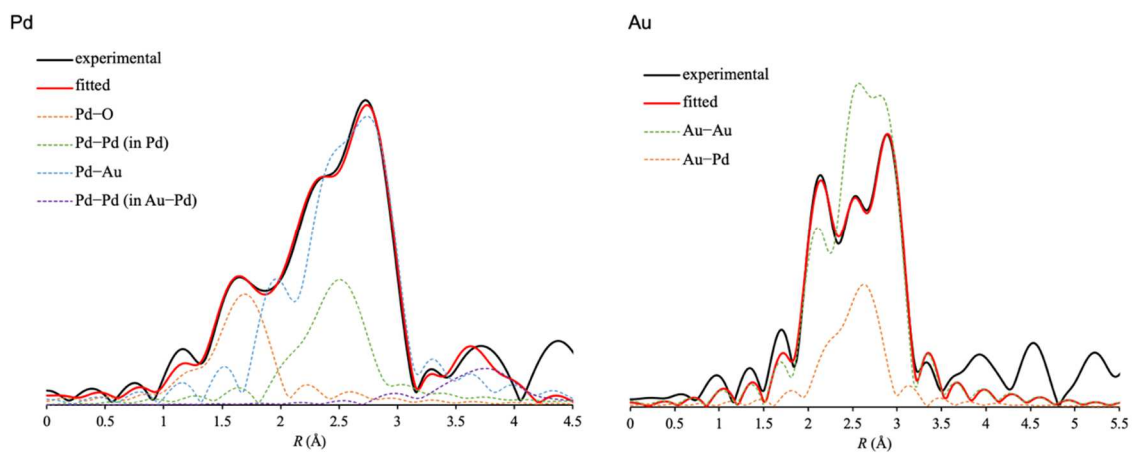

**Fig. S2** Fourier-transformed  $k^3$ -weighted (a) Pd K-edge and (b) Au L<sub>III</sub>-edge EXAFS spectra of Au<sub>4.4</sub>-Pd<sub>1</sub>/TiO<sub>2</sub>. Experimental data and fitted data are shown. All  $R$ -space spectra are shown without phase correction.

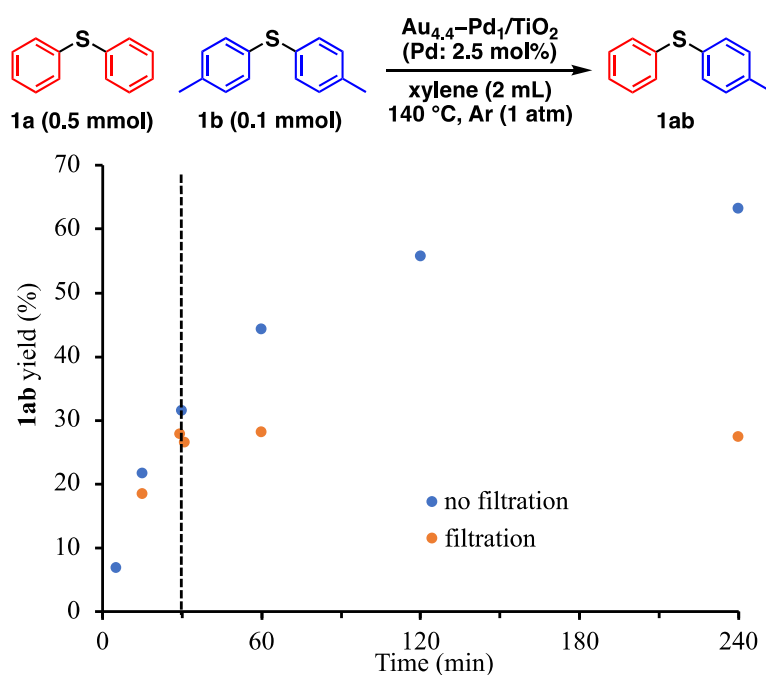

**Fig. S3** Effect of removal of  $\text{Au}_{4.4}\text{-Pd}_1\text{/TiO}_2$  catalyst on the metathesis between **1a** and **1b**. Reaction conditions: **1a** (0.5 mmol), **1b** (0.1 mmol),  $\text{Au}_{4.4}\text{-Pd}_1\text{/TiO}_2$  (Pd: 2.5 mol%), xylene (2 mL), Ar (1 atm), 140 °C. Yields were determined by GC analysis using 1,3,5-trimethoxybenzene as an internal standard.

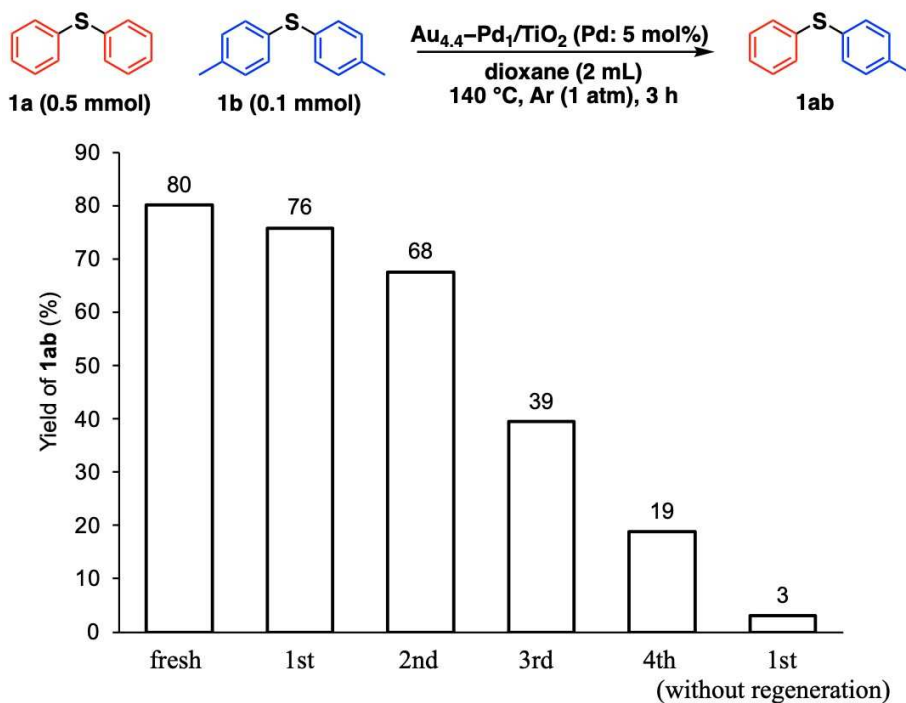

**Fig. S4**  $\text{Au}_{4.4}\text{-Pd}_1\text{/TiO}_2$  reuse experiments. The yields after 3 h are shown. The reaction conditions are indicated in this figure.

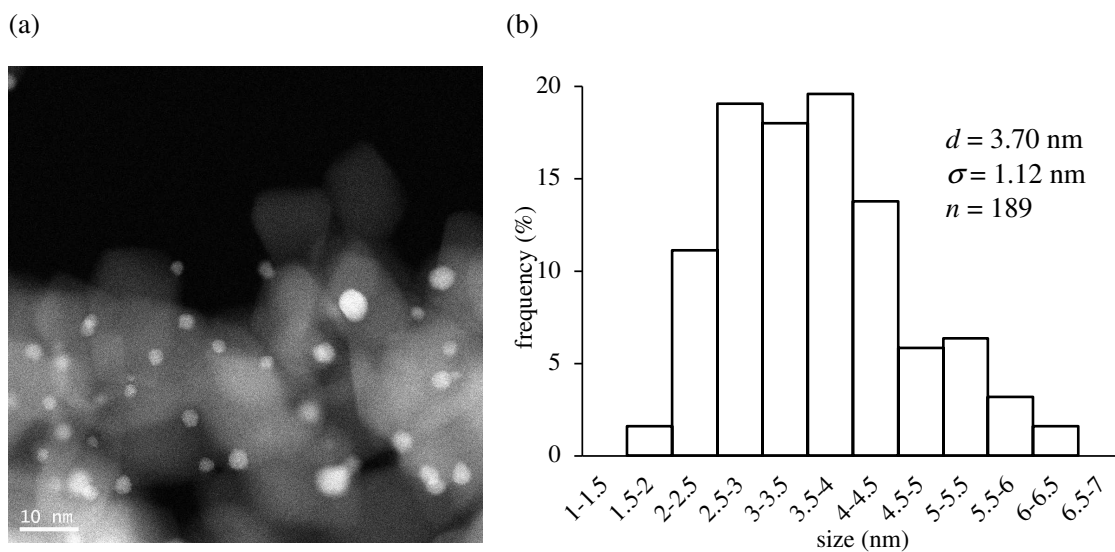

**Fig. S5** (a) HAADF-STEM image of Au<sub>4.4</sub>-Pd<sub>1</sub>/TiO<sub>2</sub> after the 1st use and (b) particle size distribution of Au<sub>4.4</sub>-Pd<sub>1</sub>/TiO<sub>2</sub> after the 1st use.

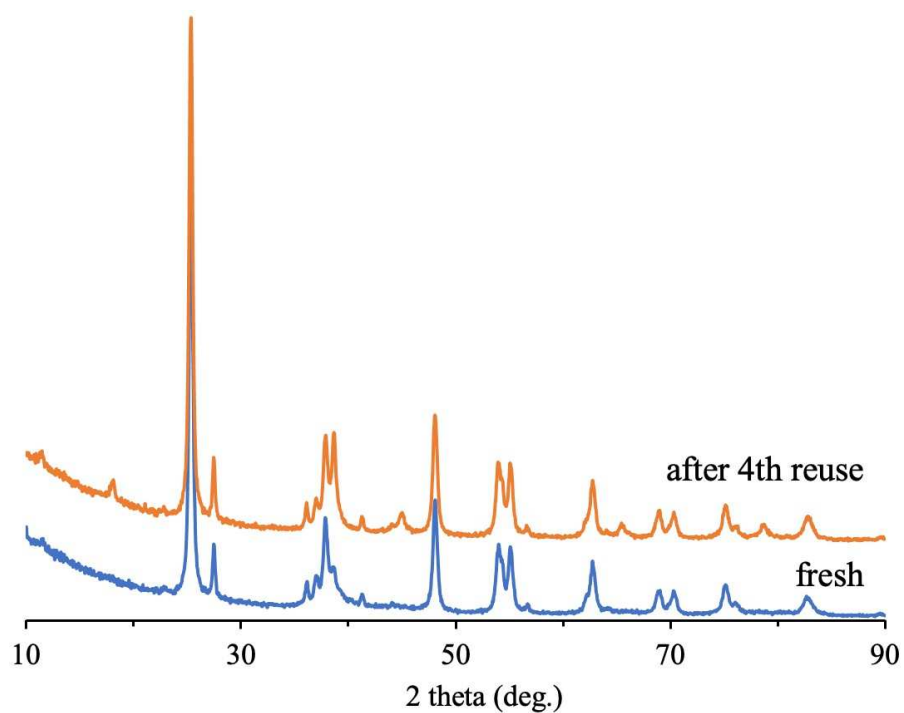

**Fig. S6** XRD patterns of Au<sub>4.4</sub>-Pd<sub>1</sub>/TiO<sub>2</sub> before use and after the 4th reuse.



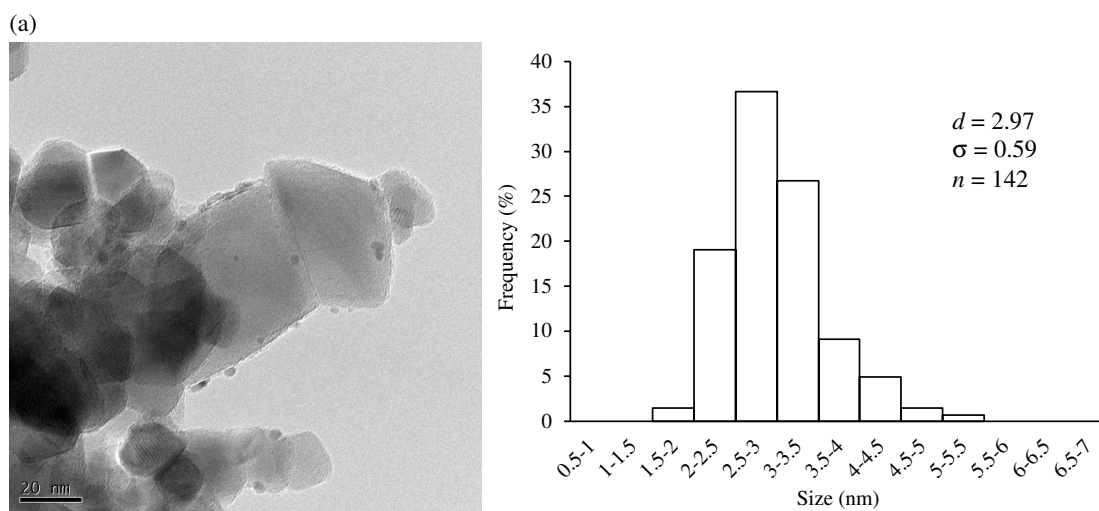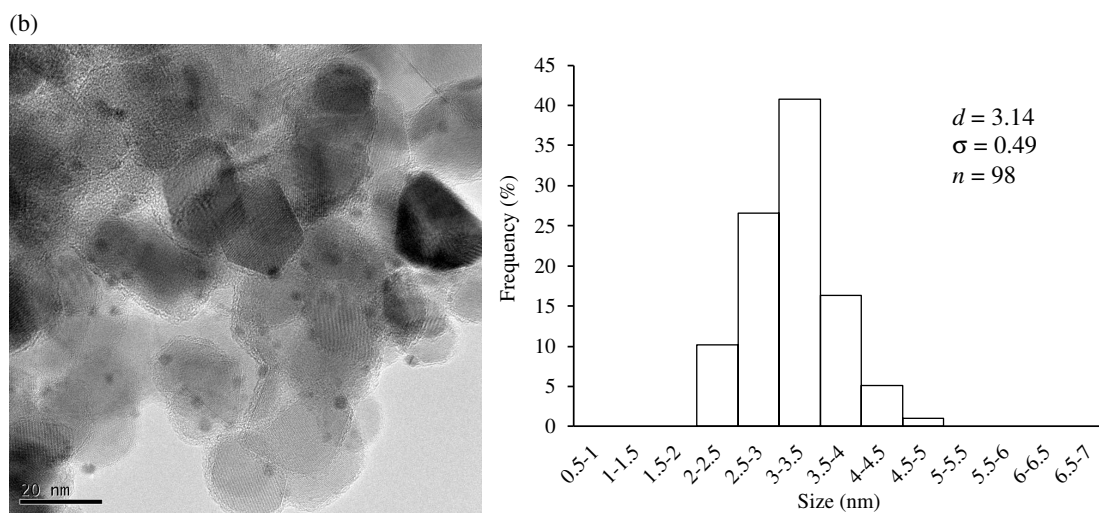

**Fig. S7** TEM images and particle size distributions of (a) Pd<sub>1</sub>/TiO<sub>2</sub> and (b) Au<sub>1.4</sub>-Pd<sub>1</sub>/TiO<sub>2</sub>.

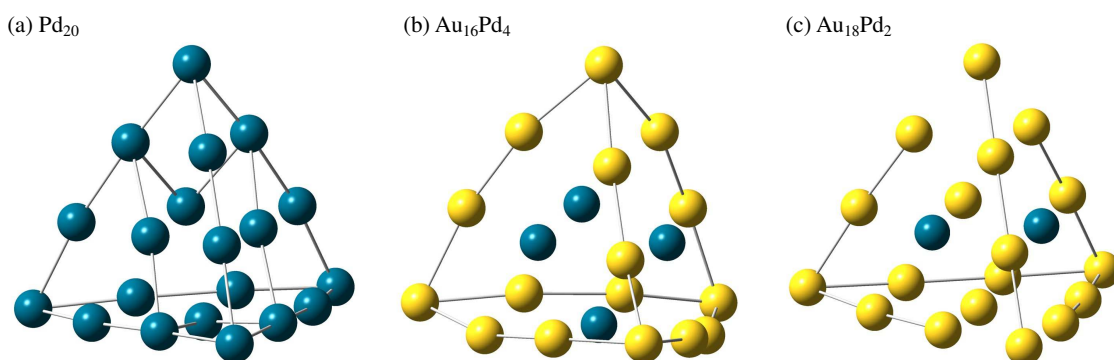

**Fig. S8** Optimized structures of (a) Pd<sub>20</sub>, (b) Au<sub>16</sub>Pd<sub>4</sub>, and (c) Au<sub>18</sub>Pd<sub>2</sub> cluster models

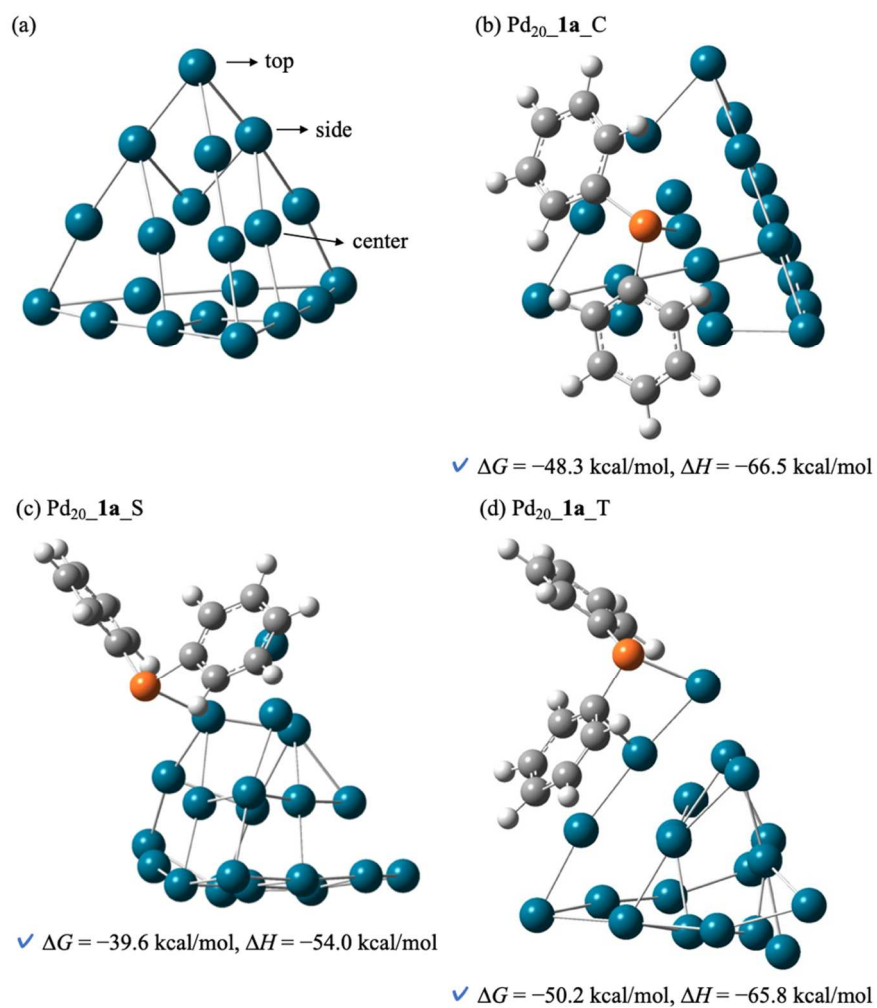

**Fig. S9** Summary of adsorption energies and optimized structures of (a) Pd<sub>20</sub>, (b) Pd<sub>20</sub>**1a**\_C, (c) Pd<sub>20</sub>**1a**\_S, and (d) Pd<sub>20</sub>**1a**\_T.

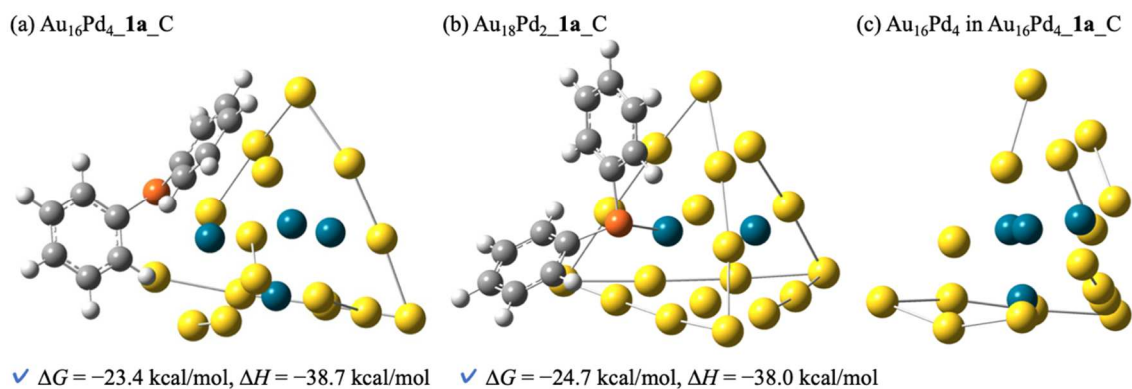

**Fig. S10** Summary of adsorption energies and optimized structures of (a) Au<sub>16</sub>Pd<sub>4</sub>\_1a\_C, (b) Au<sub>18</sub>Pd<sub>2</sub>\_1a\_C, and (c) Au<sub>18</sub>Pd<sub>2</sub> in Au<sub>18</sub>Pd<sub>2</sub>\_1a\_C.

(a) Pd<sub>20</sub>\_1a\_C (NBO charge)

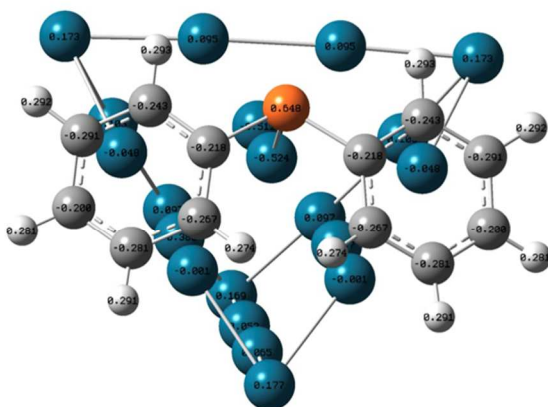

✓ Total NBO charge of aromatic rings: -3.00

(b) Au<sub>18</sub>Pd<sub>2</sub>\_1a\_C (NBO charge)

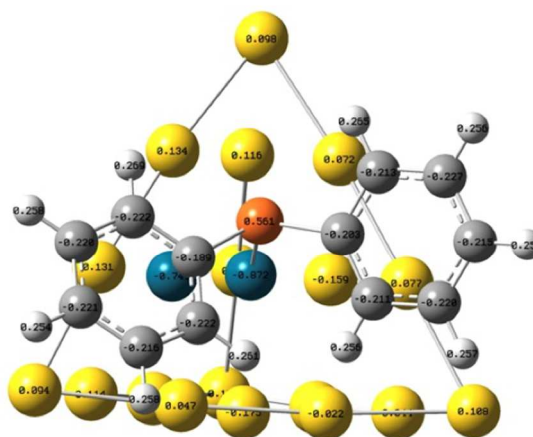

✓ Total NBO charge of aromatic rings: -2.58

(c) 1a (NBO charge)

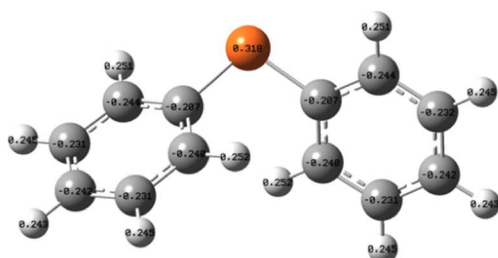

✓ Total NBO charge of aromatic rings: -2.79

**Fig. S11** NBO charge in (a) Pd<sub>20</sub>\_1a\_C, (b) Au<sub>18</sub>Pd<sub>2</sub>\_1a\_C, and (c) free 1a.

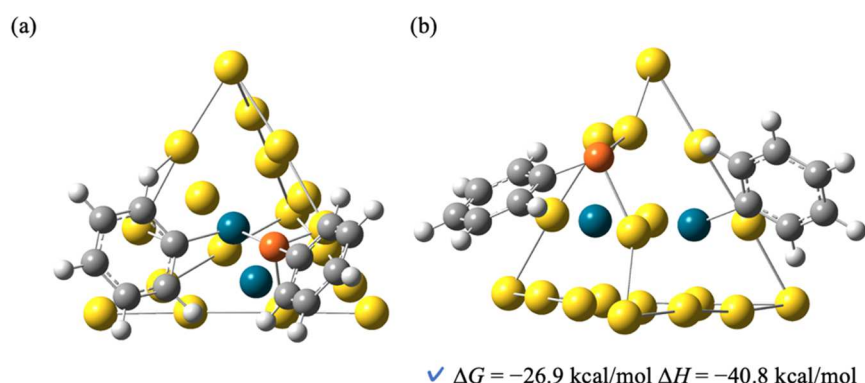

**Fig. S12** (a) An initial structure of the **1a** oxidative adduct only on the Pd atom of  $\text{Au}_{18}\text{Pd}_2$  and (b) the optimized structure after the DFT calculation using the initial structure with the adsorption energy.

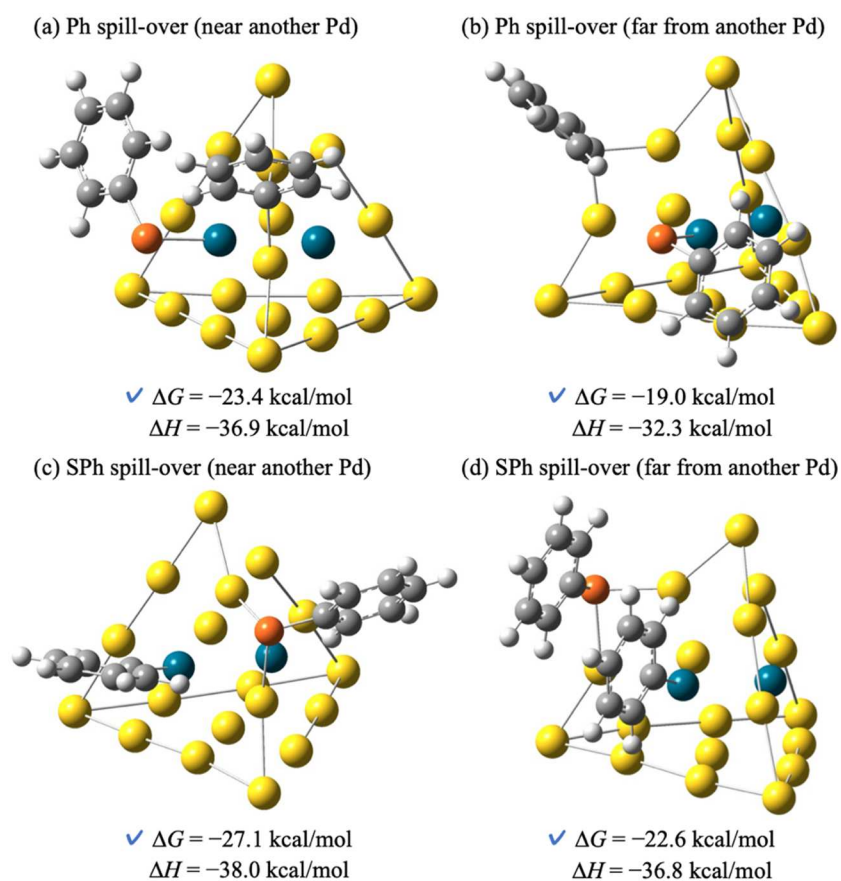

**Fig. S13** Summary and adsorption energies of optimized structures of **1a** oxidative adducts on  $\text{Au}_{18}\text{Pd}_2$ .

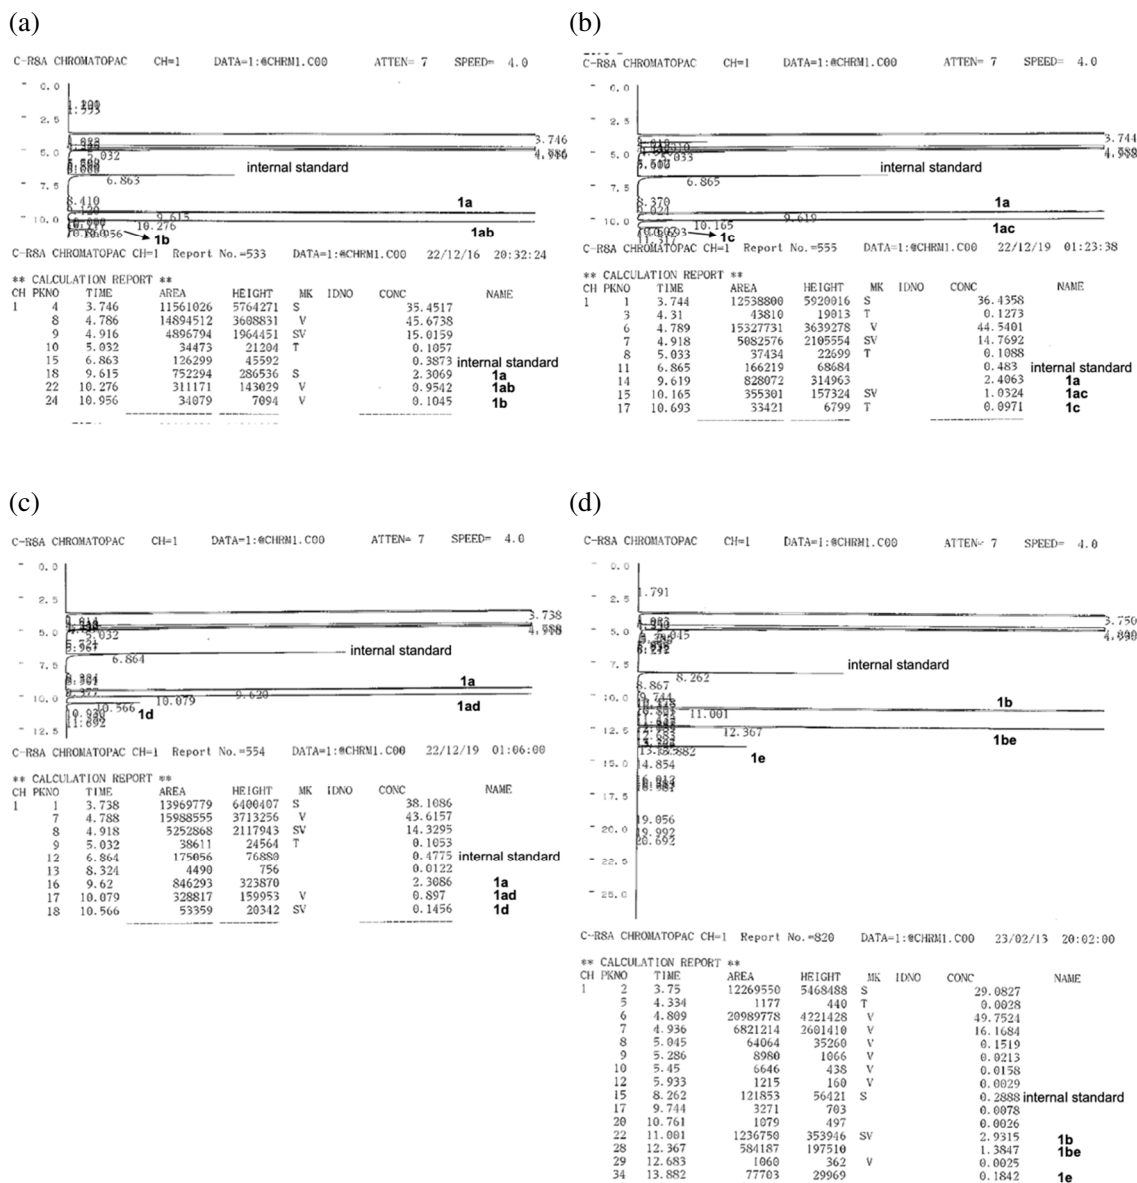

**Fig. S14** GC charts of the reaction solution after Au<sub>4.4</sub>-Pd<sub>1</sub>/TiO<sub>2</sub>-catalyzed thioether metathesis between (a) **1a** and **1b**, (b) **1a** and **1c**, (c) **1a** and **1d**, and (d) **1b** and **1e**. The reaction conditions are shown in Scheme 2.

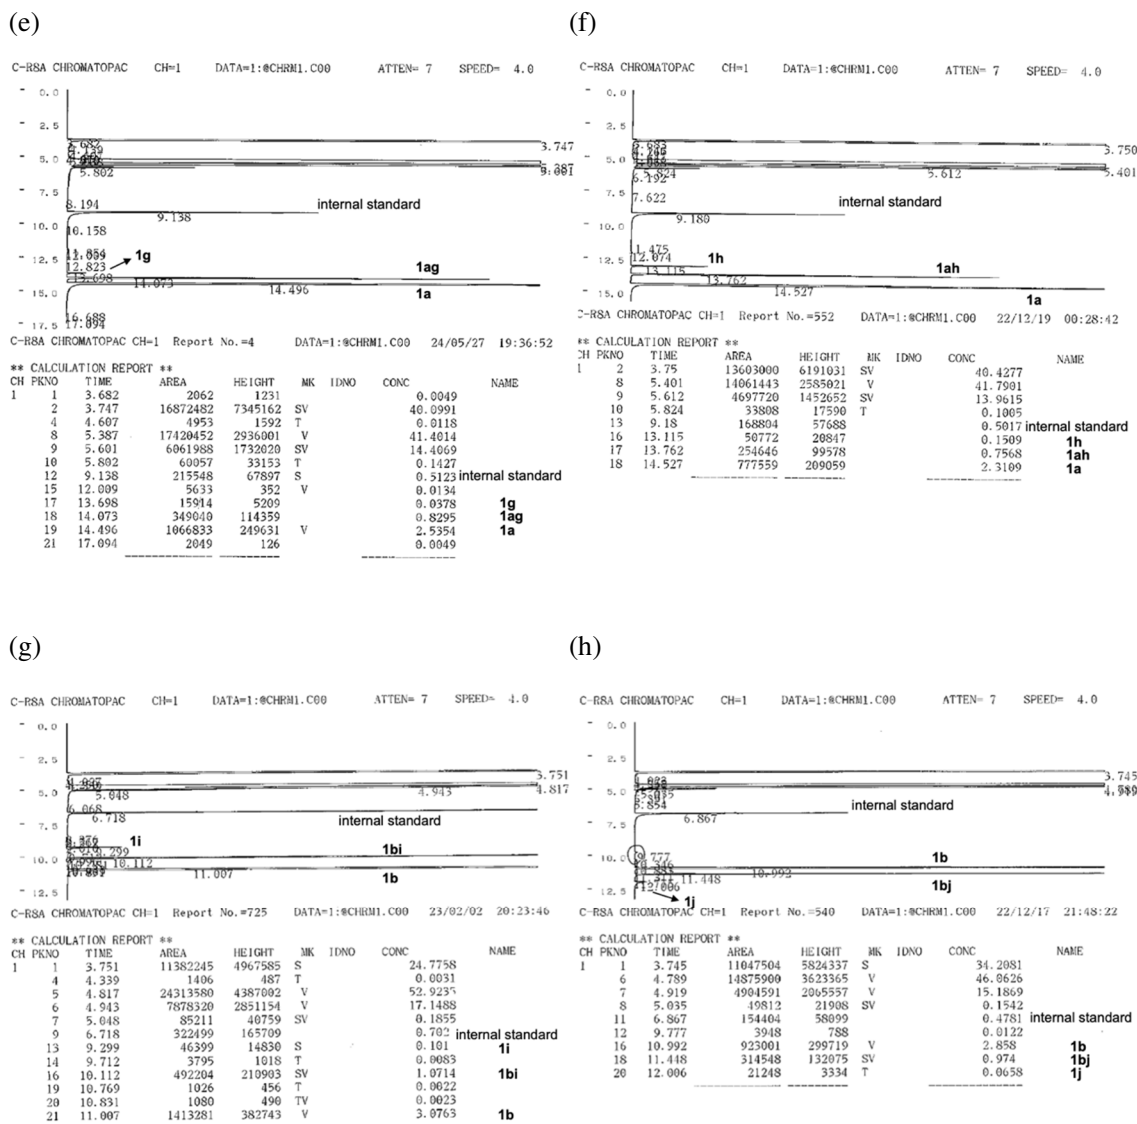

**Fig. S14** (continued) GC charts of the reaction solution after Au<sub>4.4</sub>-Pd<sub>1</sub>/TiO<sub>2</sub>-catalyzed thioether metathesis between (e) **1a** and **1g**, (f) **1a** and **1h**, (g) **1b** and **1i**, and (h) **1b** and **1j**. The reaction conditions are shown in Scheme 2.

(i)

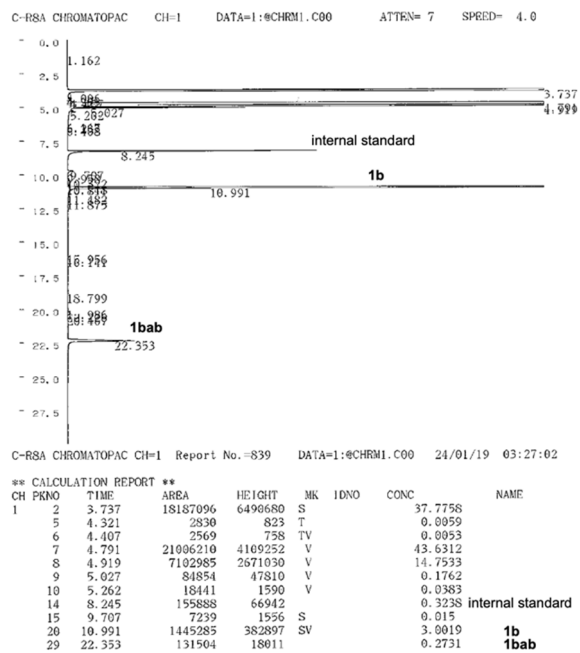

**Fig. S14** (continued) GC charts of the reaction solution after Au<sub>4.4</sub>-Pd<sub>1</sub>/TiO<sub>2</sub>-catalyzed thioether metathesis between (i) **1a'** and **1b**. The reaction conditions are shown in Scheme 2.

## Supplementary Tables

**Table S1** Effect of Pd catalysts on the metathesis between **1a** and **1b**.<sup>a</sup>

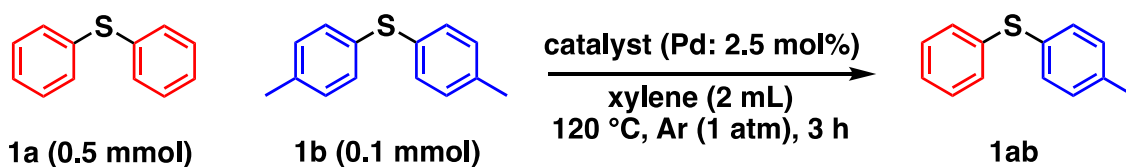

| entry          | catalyst                                             | conv. (%) |           | yield (%)  |
|----------------|------------------------------------------------------|-----------|-----------|------------|
|                |                                                      | <b>1a</b> | <b>1b</b> | <b>1ab</b> |
| 1              | Pd <sub>1</sub> /TiO <sub>2</sub>                    | 9         | 11        | 1          |
| 2              | Pd <sub>3</sub> /TiO <sub>2</sub>                    | 13        | 16        | 2          |
| 3              | Pd <sub>5</sub> /TiO <sub>2</sub>                    | 12        | 13        | 2          |
| 4 <sup>b</sup> | Pd <sub>1</sub> /TiO <sub>2</sub> + PCy <sub>3</sub> | <1        | 3         | <1         |

<sup>a</sup>Reaction conditions: **1a** (0.5 mmol), **1b** (0.1 mmol), catalyst (Pd: 2.5 mol%), xylene (2 mL), 120 °C, 3 h in test tube. Conversions and yields were determined by GC analysis using 1,3,5-trimethoxybenzene as an internal standard. <sup>b</sup>PCy<sub>3</sub> (2.5 mol%). PCy<sub>3</sub> = tricyclohexylphosphine.

**Table S2** Fitted parameters from (a) Pd K-edge and (b) Au L<sub>III</sub>-edge EXAFS spectra of Au<sub>4.4</sub>-Pd<sub>1</sub>/TiO<sub>2</sub>.

(a)

| Shell            | C.N.    | <i>R</i> (Å) | $\Delta E_{j0}$ (eV) | $\sigma^2 \times 10^2$ (Å <sup>2</sup> ) | <i>R</i> -factor (%) |
|------------------|---------|--------------|----------------------|------------------------------------------|----------------------|
| Pd–O             | 0.9±0.2 | 2.04         | 10 (fixed)           | 0.577                                    | 0.38                 |
| Pd–Pd (in Pd)    | 0.7±0.2 | 2.82         | -10 (fixed)          | 0.506                                    |                      |
| Pd–Au            | 5.0±0.6 | 2.83         | -1.72 (fixed)        | 0.773                                    |                      |
| Pd–Pd (in Au–Pd) | 1.1±1.0 | 3.94         | -8.62 (fixed)        | 0.634                                    |                      |

(b)

| Shell | C.N.    | <i>R</i> (Å) | $\Delta E_{j0}$ (eV) | $\sigma^2 \times 10^2$ (Å <sup>2</sup> ) | <i>R</i> -factor (%) |
|-------|---------|--------------|----------------------|------------------------------------------|----------------------|
| Au–Pd | 1.1±0.3 | 2.80         | 3.51 (fixed)         | 0.751                                    | 0.17                 |
| Au–Au | 8.2±0.5 | 2.82         | 4.39 (fixed)         | 0.930                                    |                      |



**Table S3** Effect of the second metals with Pd on the metathesis between **1a** and **1b**.<sup>a</sup>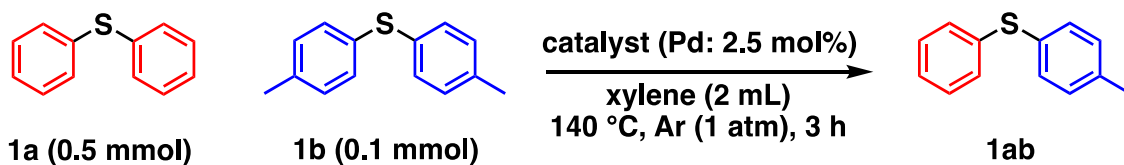

| entry | catalyst                                             | conv. (%) |           | yield (%)  |
|-------|------------------------------------------------------|-----------|-----------|------------|
|       |                                                      | <b>1a</b> | <b>1b</b> | <b>1ab</b> |
| 1     | Au <sub>4.4</sub> -Pd <sub>1</sub> /TiO <sub>2</sub> | 23        | 80        | 69         |
| 2     | Ru <sub>6</sub> -Pd <sub>1</sub> /TiO <sub>2</sub>   | 6         | 30        | 28         |
| 3     | Co <sub>6</sub> -Pd <sub>1</sub> /TiO <sub>2</sub>   | 4         | 20        | 19         |
| 4     | Ni <sub>6</sub> -Pd <sub>1</sub> /TiO <sub>2</sub>   | 3         | 5         | 1          |
| 5     | Ag <sub>6</sub> -Pd <sub>1</sub> /ZrO <sub>2</sub>   | 8         | 8         | 2          |

<sup>a</sup>Reaction conditions: **1a** (0.5 mmol), **1b** (0.1 mmol), catalyst (Pd: 2.5 mol%), xylene (2 mL), 140 °C, 3 h in test tube. Conversions and yields were determined by GC analysis using 1,3,5-trimethoxybenzene as an internal standard.

**Table S4** Effect of the supports on the metathesis between **1a** and **1b**.<sup>a</sup>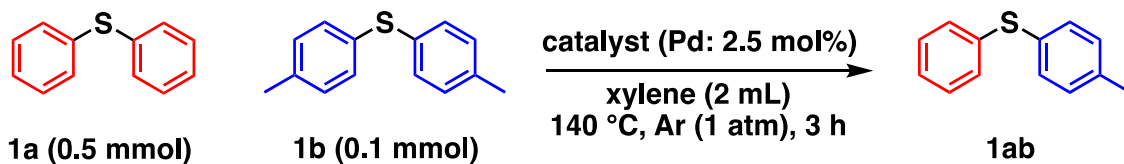

| entry | catalyst                                                           | conv. (%) |           | yield (%)  |
|-------|--------------------------------------------------------------------|-----------|-----------|------------|
|       |                                                                    | <b>1a</b> | <b>1b</b> | <b>1ab</b> |
| 1     | Au <sub>4.4</sub> -Pd <sub>1</sub> /TiO <sub>2</sub>               | 23        | 80        | 69         |
| 2     | Au <sub>1.4</sub> -Pd <sub>1</sub> /CeO <sub>2</sub>               | 24        | 70        | 57         |
| 3     | Au <sub>5.4</sub> -Pd <sub>1</sub> /LDH                            | 18        | 51        | 39         |
| 4     | Au <sub>3.6</sub> -Pd <sub>1</sub> /Al <sub>2</sub> O <sub>3</sub> | 13        | 34        | 24         |
| 5     | Au <sub>2.6</sub> -Pd <sub>1</sub> /HAP                            | 14        | 33        | 21         |
| 6     | Au <sub>2.5</sub> -Pd <sub>1</sub> /ZrO <sub>2</sub>               | 12        | 19        | 8          |

<sup>a</sup>Reaction conditions: **1a** (0.5 mmol), **1b** (0.1 mmol), catalyst (Pd: 2.5 mol%), xylene (2 mL), 140 °C, 3 h in test tube. Conversions and yields were determined by GC analysis using 1,3,5-trimethoxybenzene as an internal standard.

**Table S5** Effect of the solvents on the metathesis between **1a** and **1b**<sup>a</sup>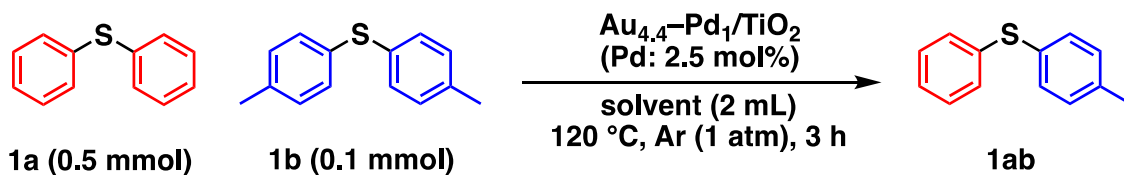

| entry | solvent     | conv. (%) |           | yield (%)  |
|-------|-------------|-----------|-----------|------------|
|       |             | <b>1a</b> | <b>1b</b> | <b>1ab</b> |
| 1     | xylene      | 18        | 66        | 55         |
| 2     | 1,4-dioxane | 12        | 45        | 44         |
| 3     | heptane     | 12        | 41        | 34         |
| 4     | NMP         | 15        | 37        | 33         |
| 5     | MCH         | 10        | 34        | 22         |
| 6     | DMA         | 10        | 24        | 17         |

<sup>a</sup>Reaction conditions: **1a** (0.5 mmol), **1b** (0.1 mmol),  $\text{Au}_{4.4}\text{-Pd}_1/\text{TiO}_2$  (Pd: 2.5 mol%), solvent (2 mL), 140 °C, 3 h in test tube. Conversions and yields were determined by GC analysis using 1,3,5-trimethoxybenzene as an internal standard. NMP = *N*-methylpyrrolidone, MCH = methylcyclohexane, DMA = *N,N*-dimethylacetamide.

**Table S6** Effect of the reaction temperatures on the metathesis between **1a** and **1b**<sup>a</sup>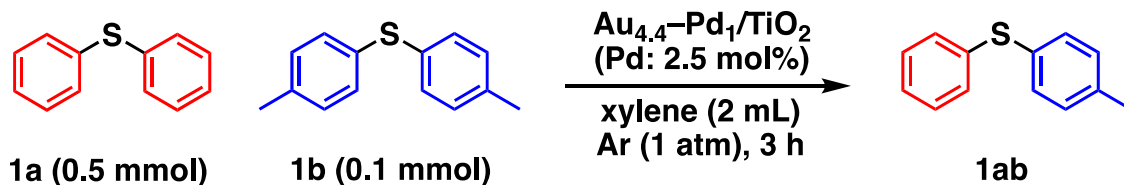

| entry          | Temperature (°C) | conv. (%) |           | yield (%)  |
|----------------|------------------|-----------|-----------|------------|
|                |                  | <b>1a</b> | <b>1b</b> | <b>1ab</b> |
| 1              | 140              | 23        | 80        | 69         |
| 2              | 120              | 18        | 66        | 55         |
| 3              | 100              | 12        | 25        | 17         |
| 4 <sup>b</sup> | 140              | 21        | 84        | 77         |
| 5 <sup>b</sup> | 120              | 22        | 80        | 70         |
| 6 <sup>b</sup> | 100              | 19        | 62        | 51         |

<sup>a</sup>Reaction conditions: **1a** (0.5 mmol), **1b** (0.1 mmol),  $\text{Au}_{4.4}\text{-Pd}_1/\text{TiO}_2$  (Pd: 2.5 mol%), xylene (2 mL), 3 h in test tube. Conversions and yields were determined by GC analysis using 1,3,5-trimethoxybenzene as an internal standard. <sup>b</sup>24 h.

**Table S7** Effect of **1a** amounts on the metathesis between **1a** and **1b**<sup>a</sup>

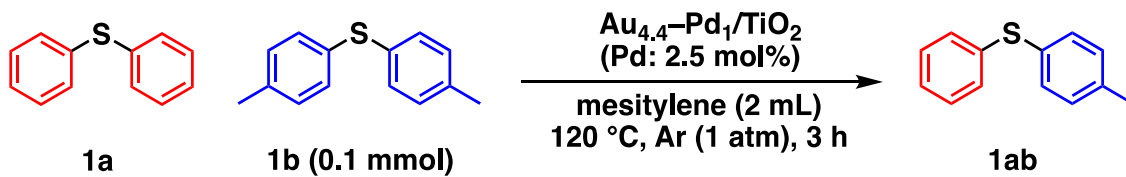

| entry          | 1a amount (mmol) | conv. (%) |    | yield (%) |
|----------------|------------------|-----------|----|-----------|
|                |                  | 1a        | 1b | 1ab       |
| 1              | 0.1              | 52        | 54 | 46        |
| 2              | 0.3              | 28        | 69 | 60        |
| 3              | 0.5              | 18        | 66 | 55        |
| 4              | 0.7              | 8         | 28 | 21        |
| 5 <sup>b</sup> | 0.1              | 52        | 58 | 48        |
| 6 <sup>b</sup> | 0.3              | 26        | 74 | 68        |
| 7 <sup>b</sup> | 0.5              | 21        | 84 | 77        |
| 8 <sup>b</sup> | 0.7              | 11        | 56 | 49        |

<sup>a</sup>Reaction conditions: **1a** (0.5 mmol), **1b** (0.1 mmol), Au<sub>4.4</sub>-Pd<sub>1</sub>/TiO<sub>2</sub> (Pd: 2.5 mol%), xylene (2 mL), 120 °C, 3 h in test tube. Conversions and yields were determined by GC analysis using 1,3,5-trimethoxybenzene as an internal standard. <sup>b</sup>140 °C, 24 h.

## NMR Spectra

<sup>1</sup>H NMR spectrum (500 MHz, CDCl<sub>3</sub>) of **1af**

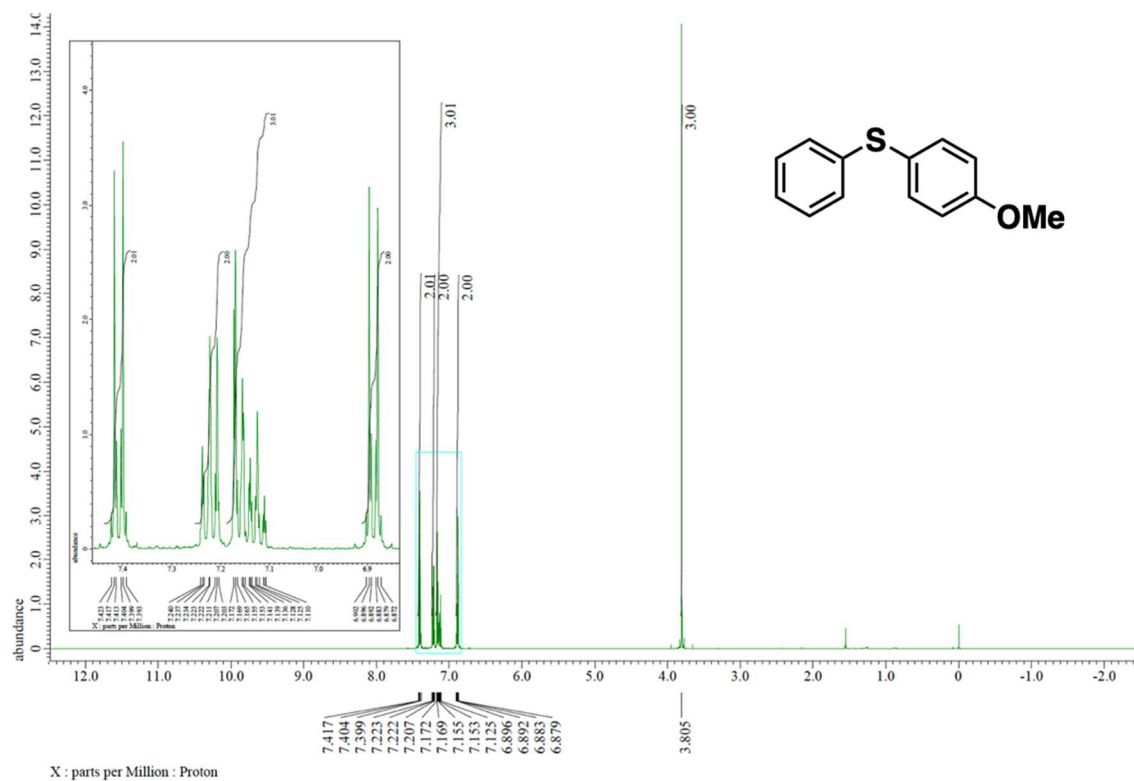

<sup>13</sup>C NMR spectrum (125 MHz, CDCl<sub>3</sub>) of **1af**

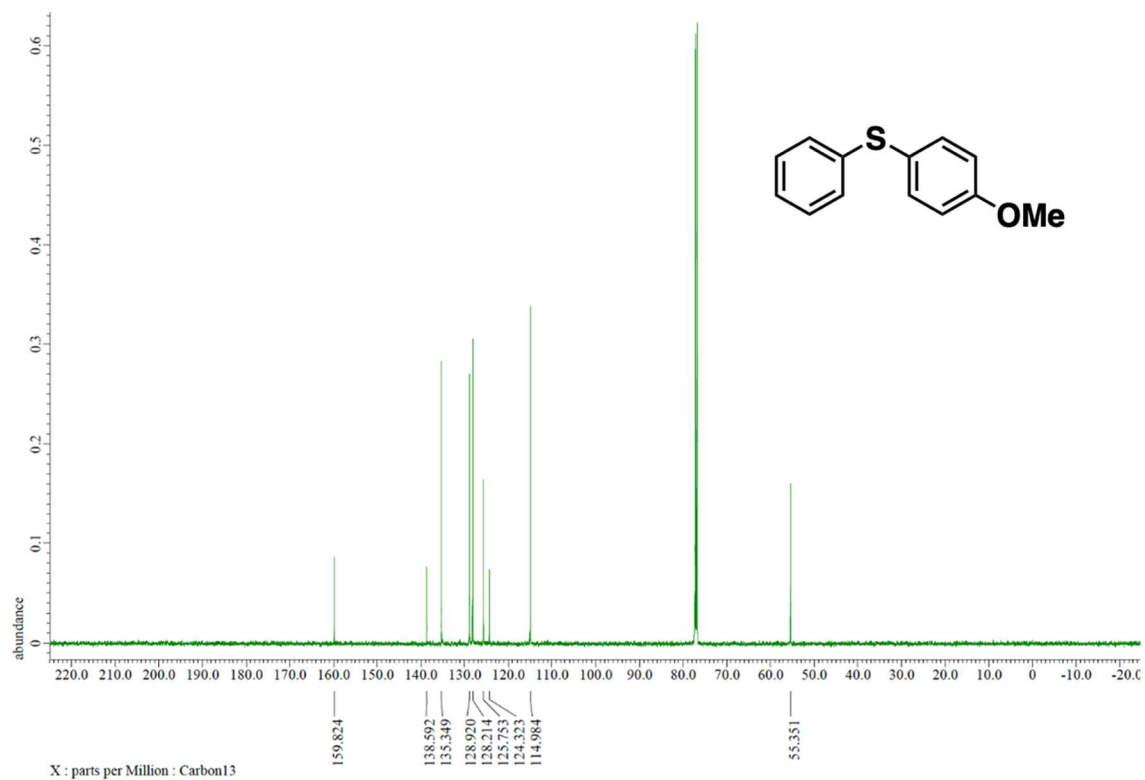

$^1\text{H}$  NMR spectrum (500 MHz,  $\text{CDCl}_3$ ) of **1bk**

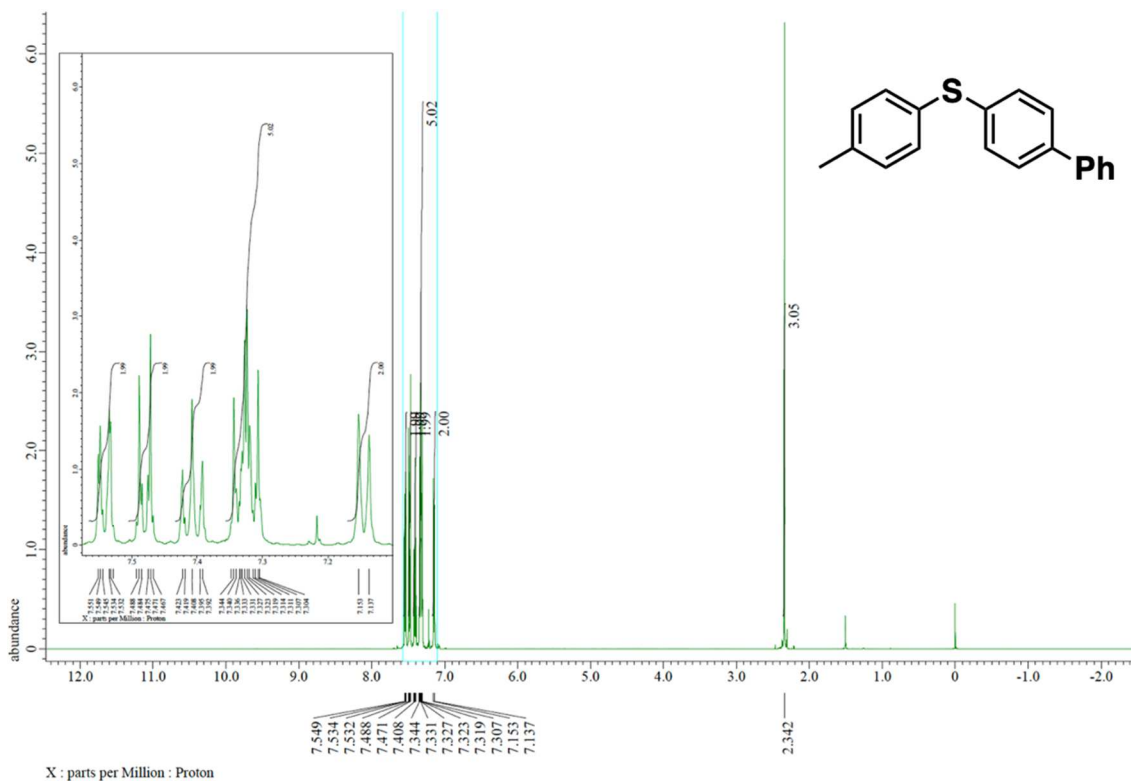

$^{13}\text{C}$  NMR spectrum (125 MHz,  $\text{CDCl}_3$ ) of **1bk**

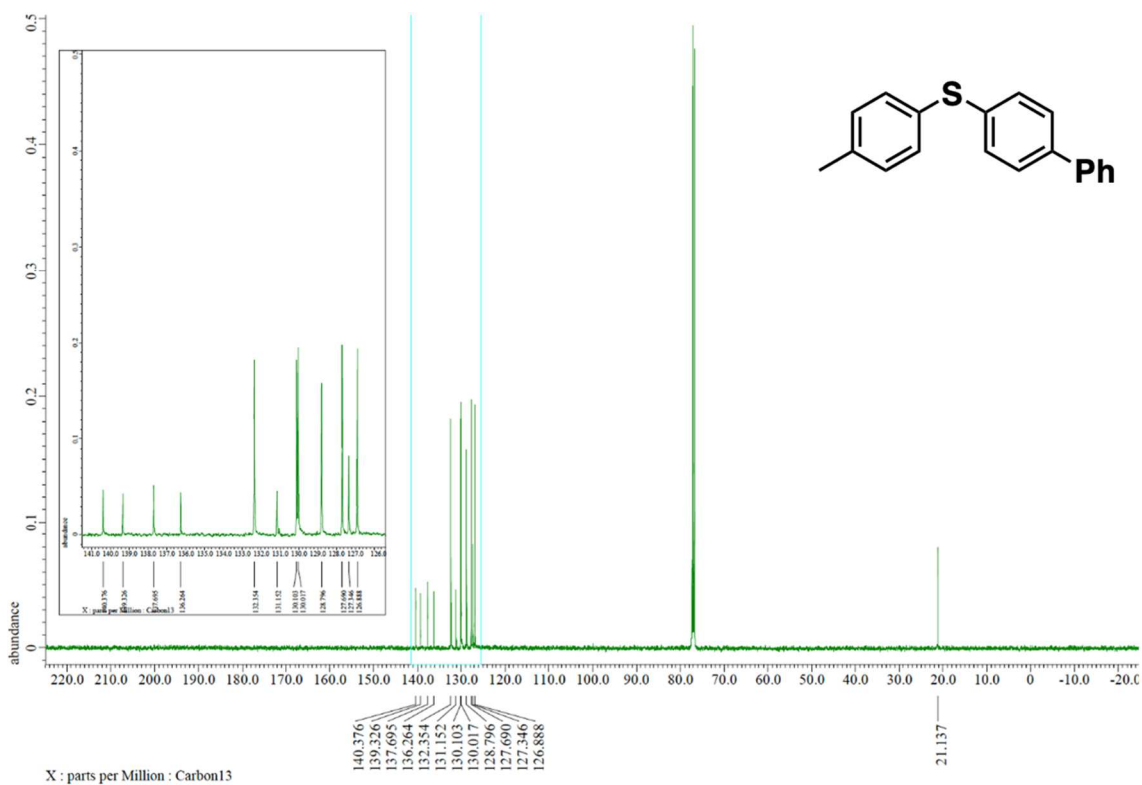

$^1\text{H}$  NMR spectrum (500 MHz,  $\text{CDCl}_3$ ) of **1b1**

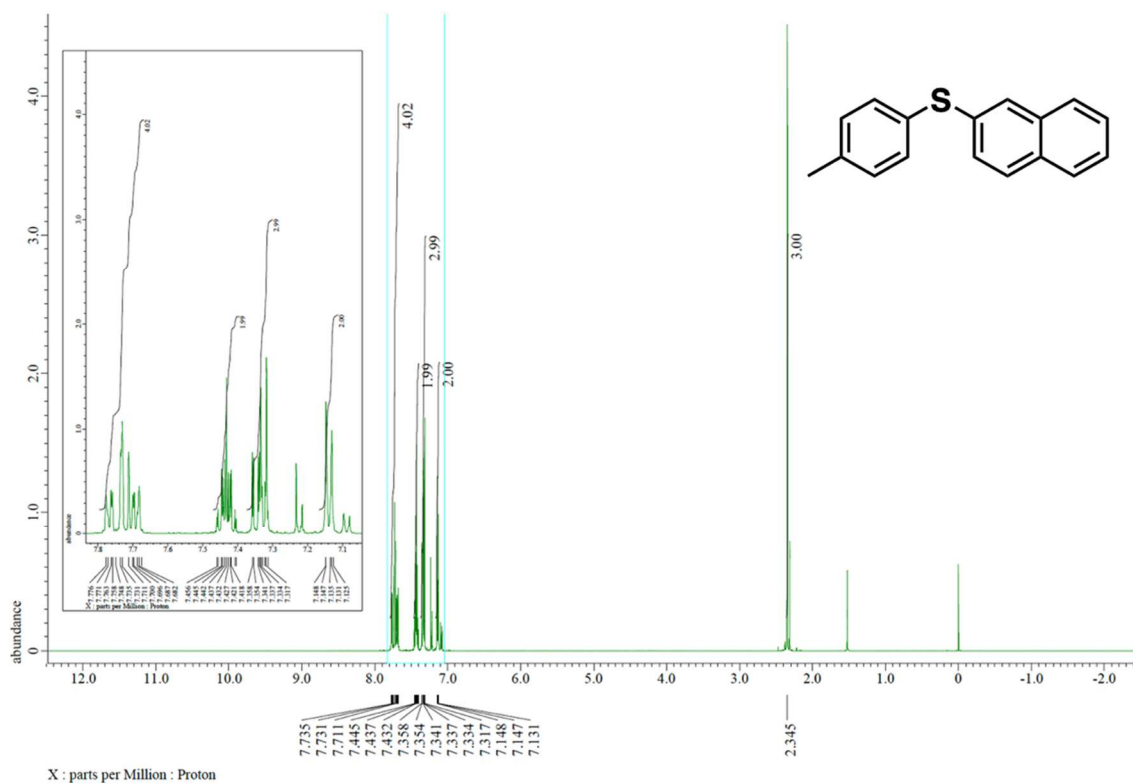

$^{13}\text{C}$  NMR spectrum (125 MHz,  $\text{CDCl}_3$ ) of **1b1**

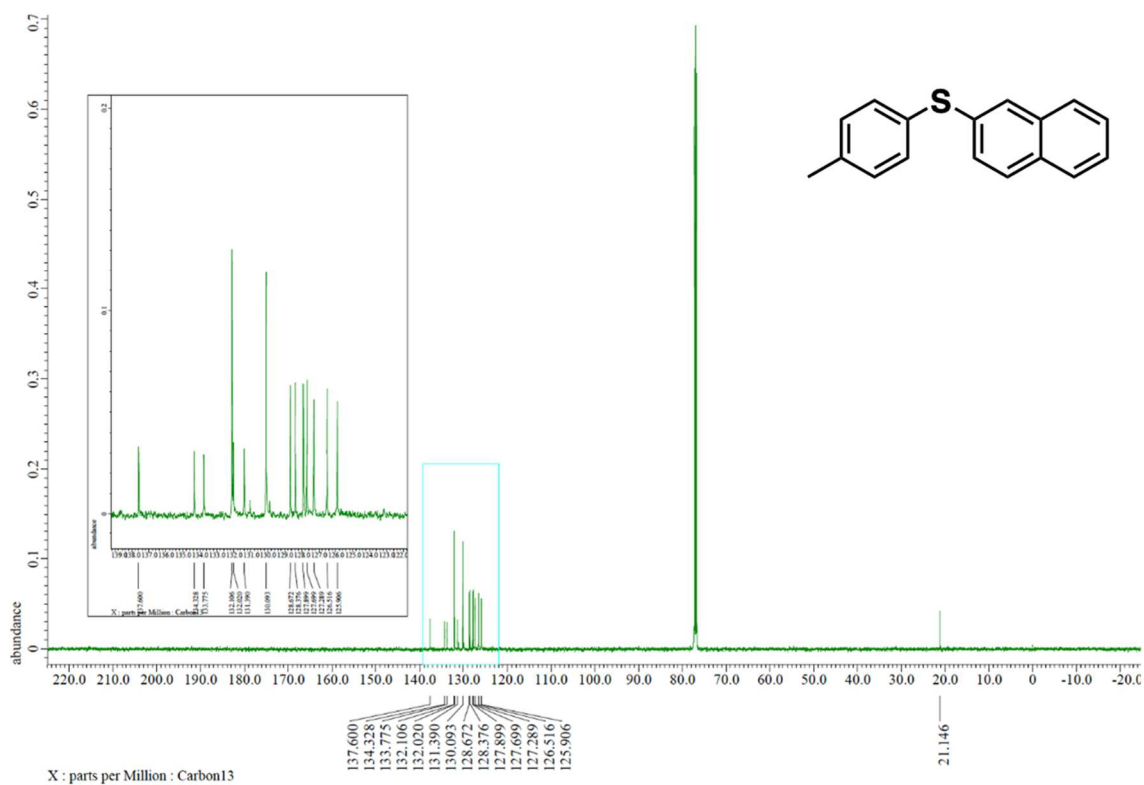

$^1\text{H}$  NMR spectrum (500 MHz,  $\text{CDCl}_3$ ) of **1am**

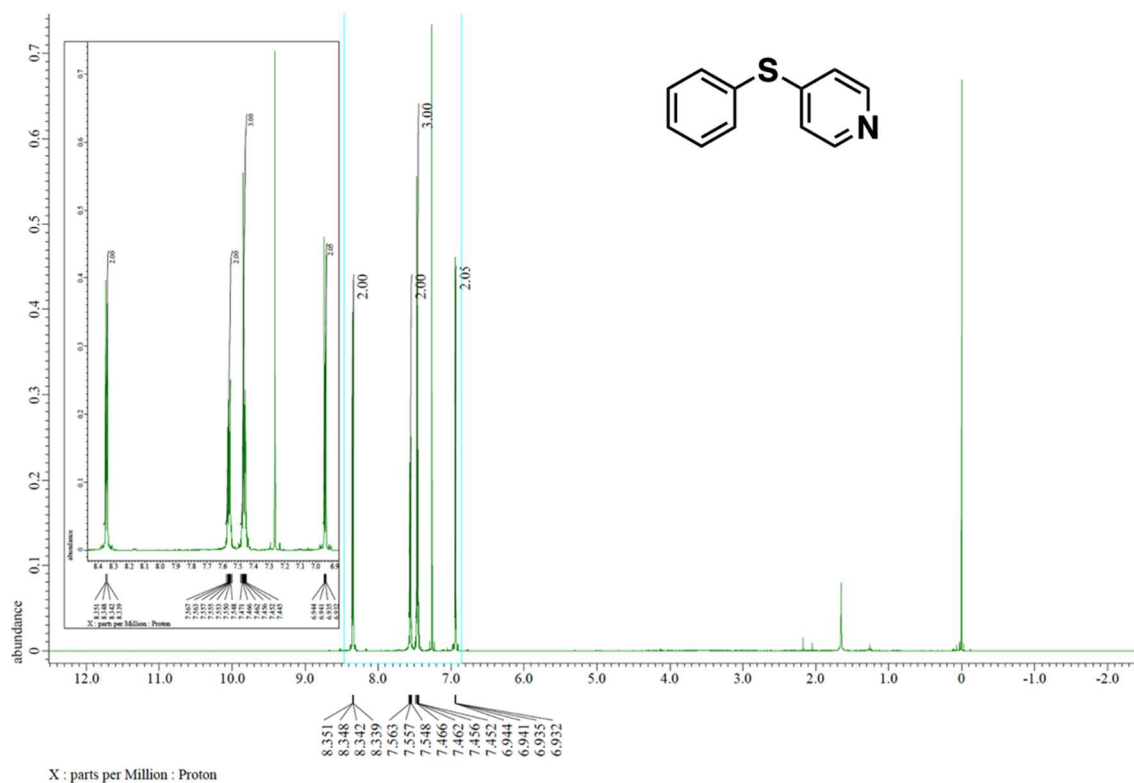

$^{13}\text{C}$  NMR spectrum (125 MHz,  $\text{CDCl}_3$ ) of **1am**

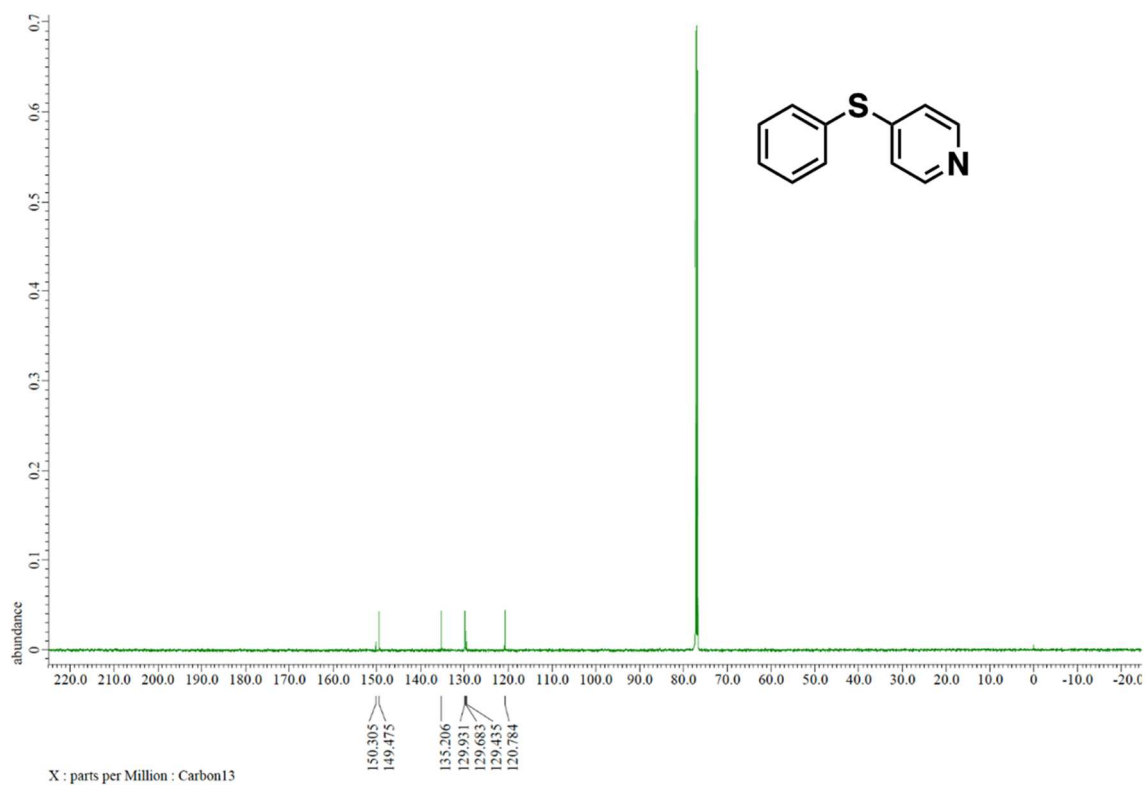

$^1\text{H}$  NMR spectrum (500 MHz,  $\text{CDCl}_3$ ) of **1an**

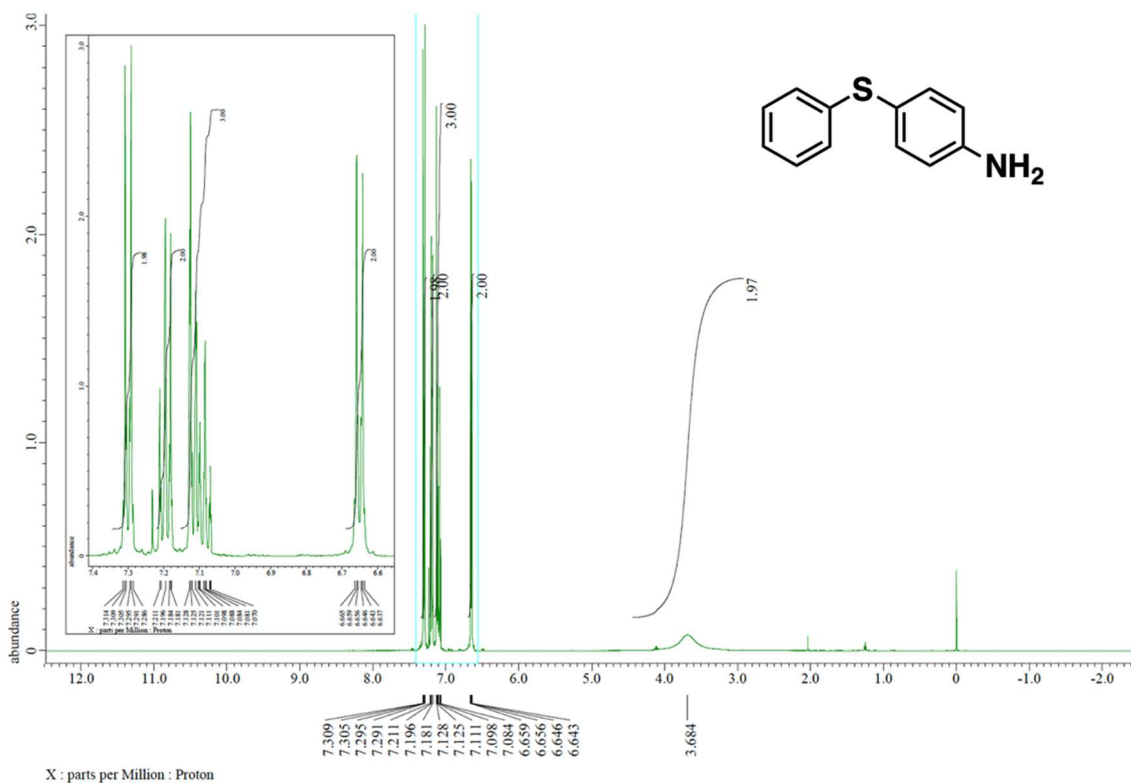

$^{13}\text{C}$  NMR spectrum (125 MHz,  $\text{CDCl}_3$ ) of **1an**

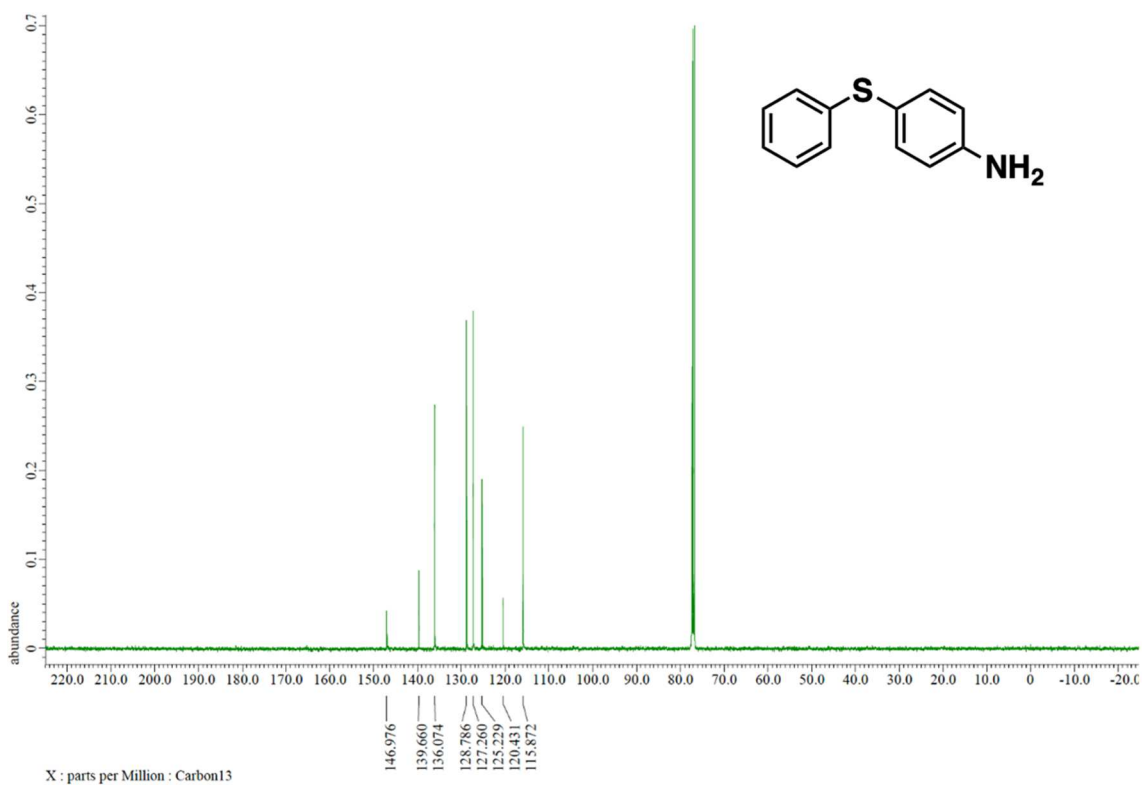



$^1\text{H}$  NMR spectrum (500 MHz,  $\text{CDCl}_3$ ) of **1bo**

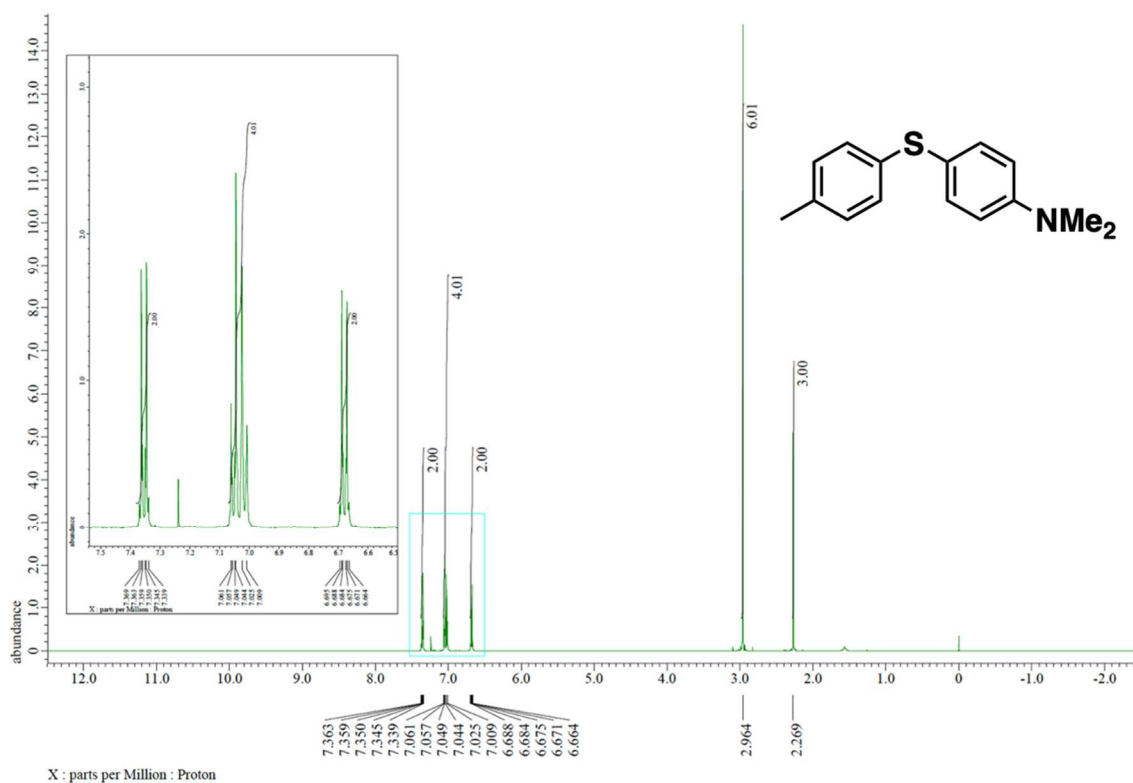

$^{13}\text{C}$  NMR spectrum (125 MHz,  $\text{CDCl}_3$ ) of **1bo**

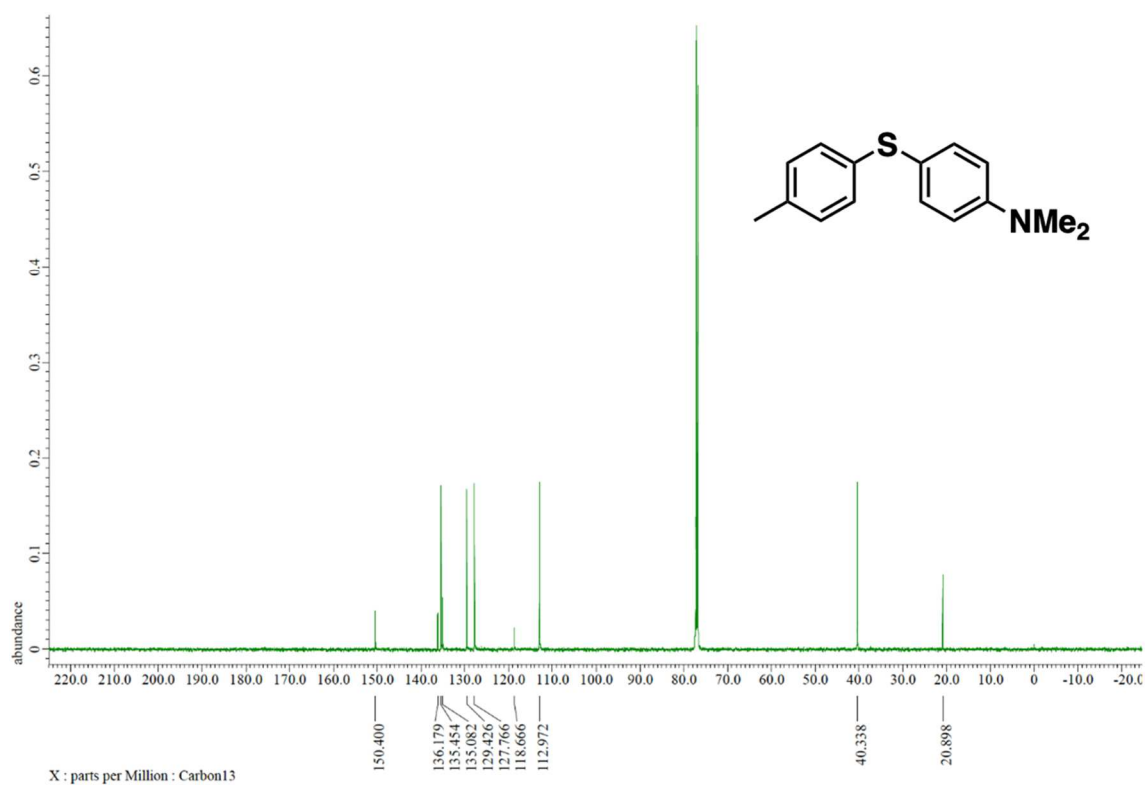

<sup>1</sup>H NMR spectrum (500 MHz, CDCl<sub>3</sub>) of **1bp**

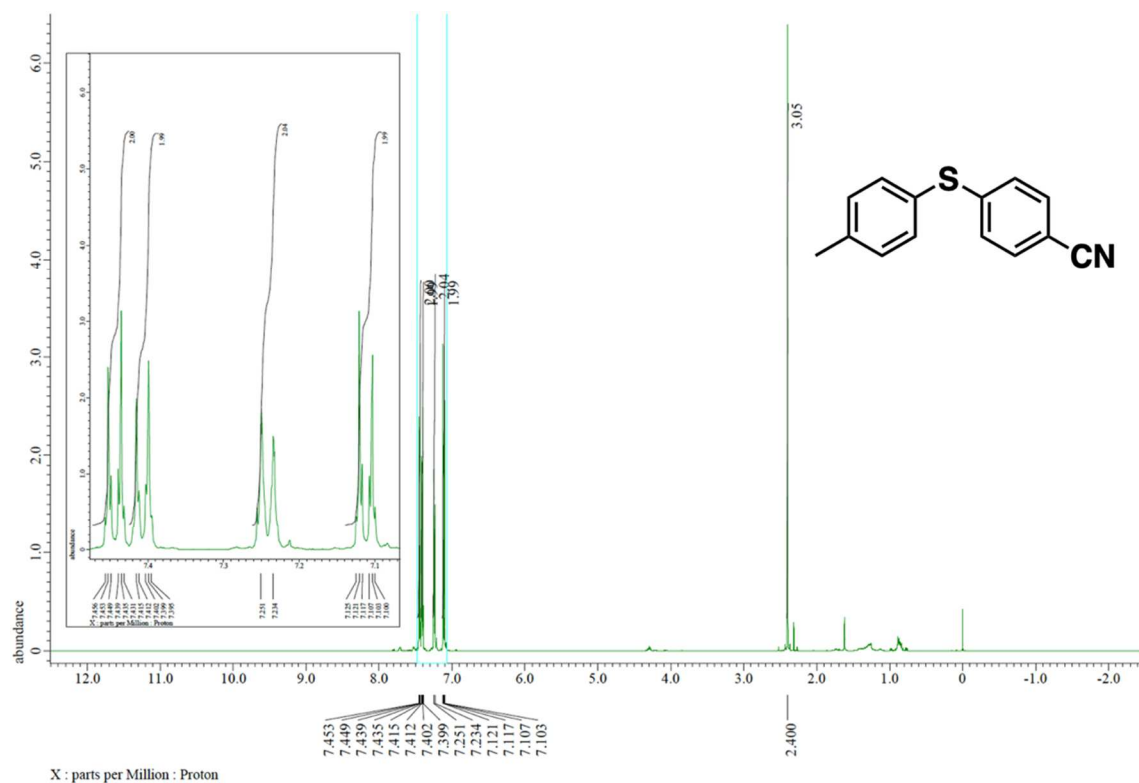

<sup>13</sup>C NMR spectrum (125 MHz, CDCl<sub>3</sub>) of **1bp**

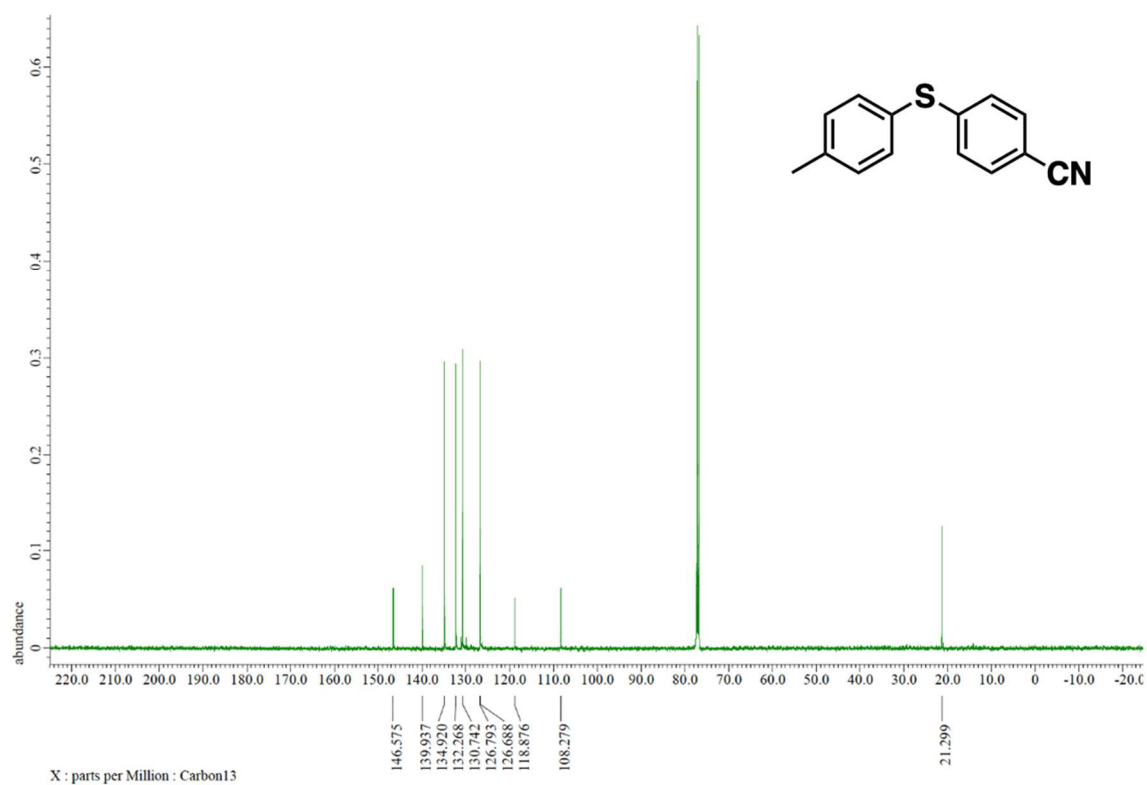

$^1\text{H}$  NMR spectrum (500 MHz,  $\text{CDCl}_3$ ) of **1aq**

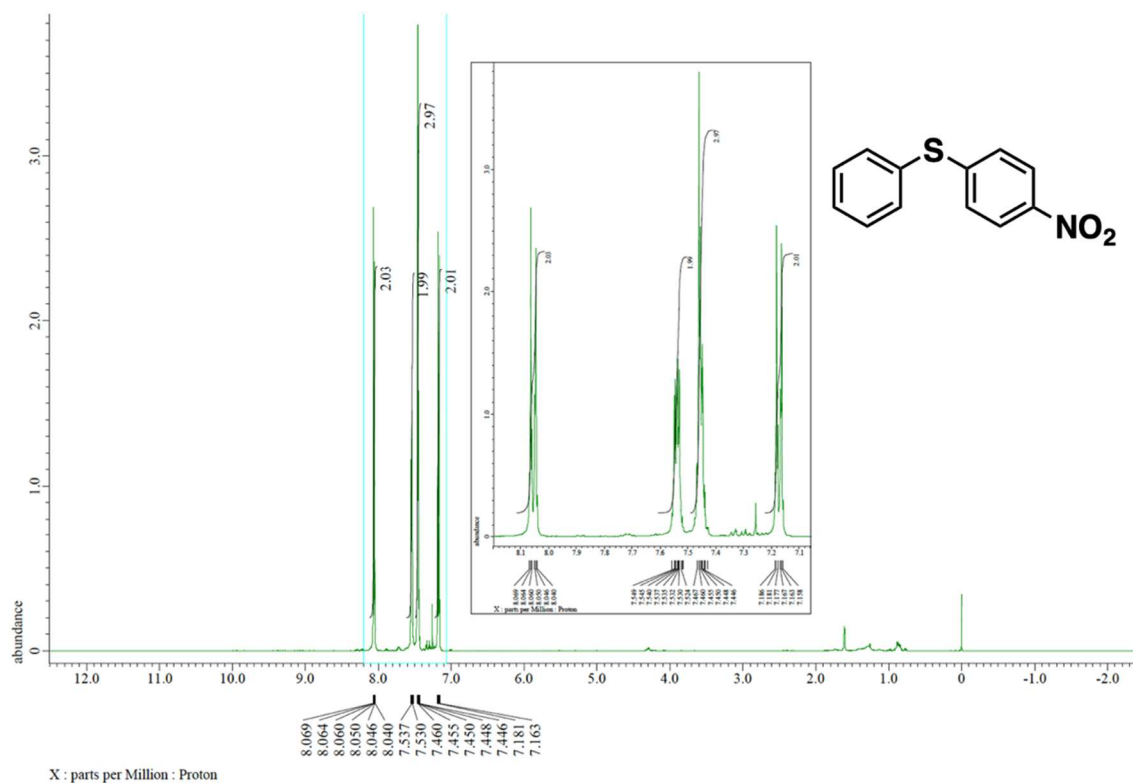

$^{13}\text{C}$  NMR spectrum (125 MHz,  $\text{CDCl}_3$ ) of **1aq**

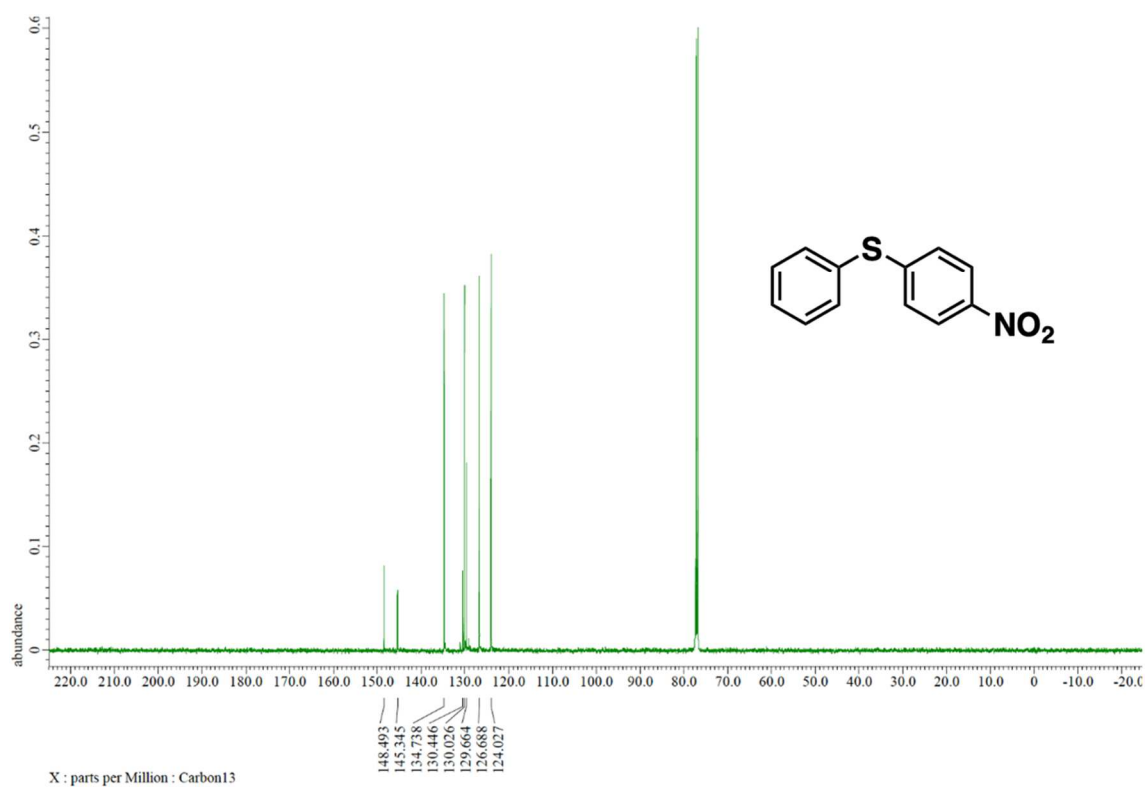

$^1\text{H}$  NMR spectrum (500 MHz,  $\text{CDCl}_3$ ) of **1br**

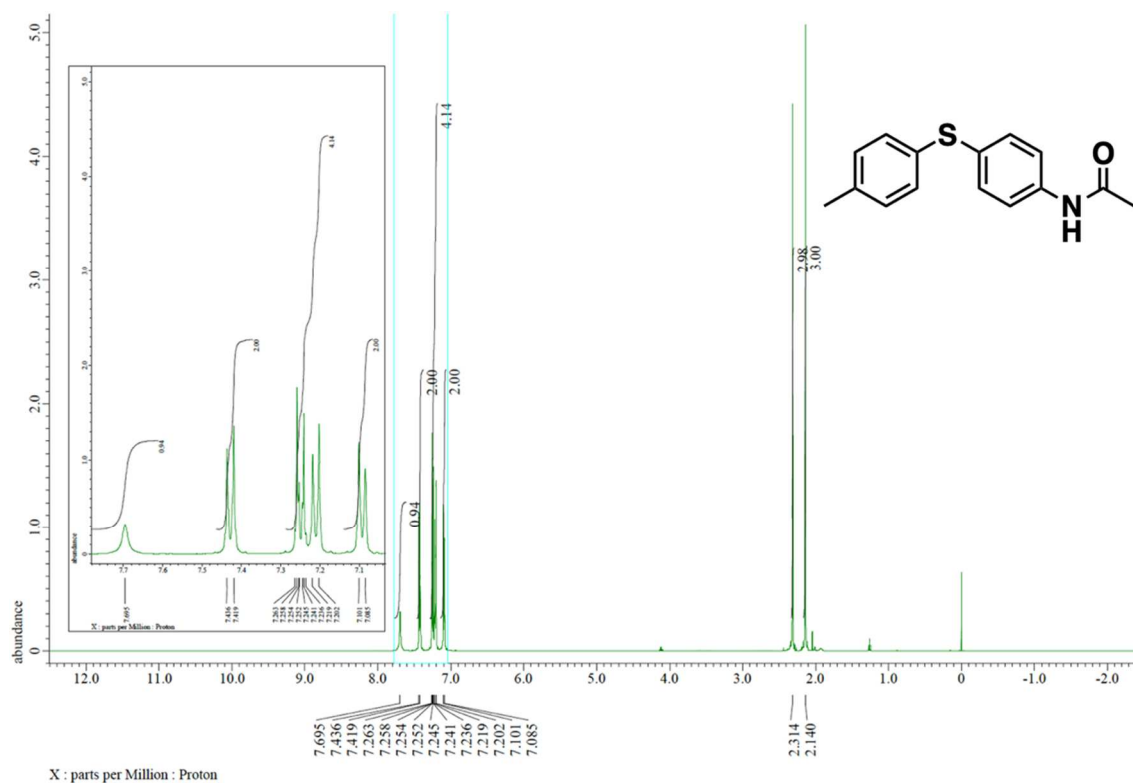

$^{13}\text{C}$  NMR spectrum (125 MHz,  $\text{CDCl}_3$ ) of **1br**

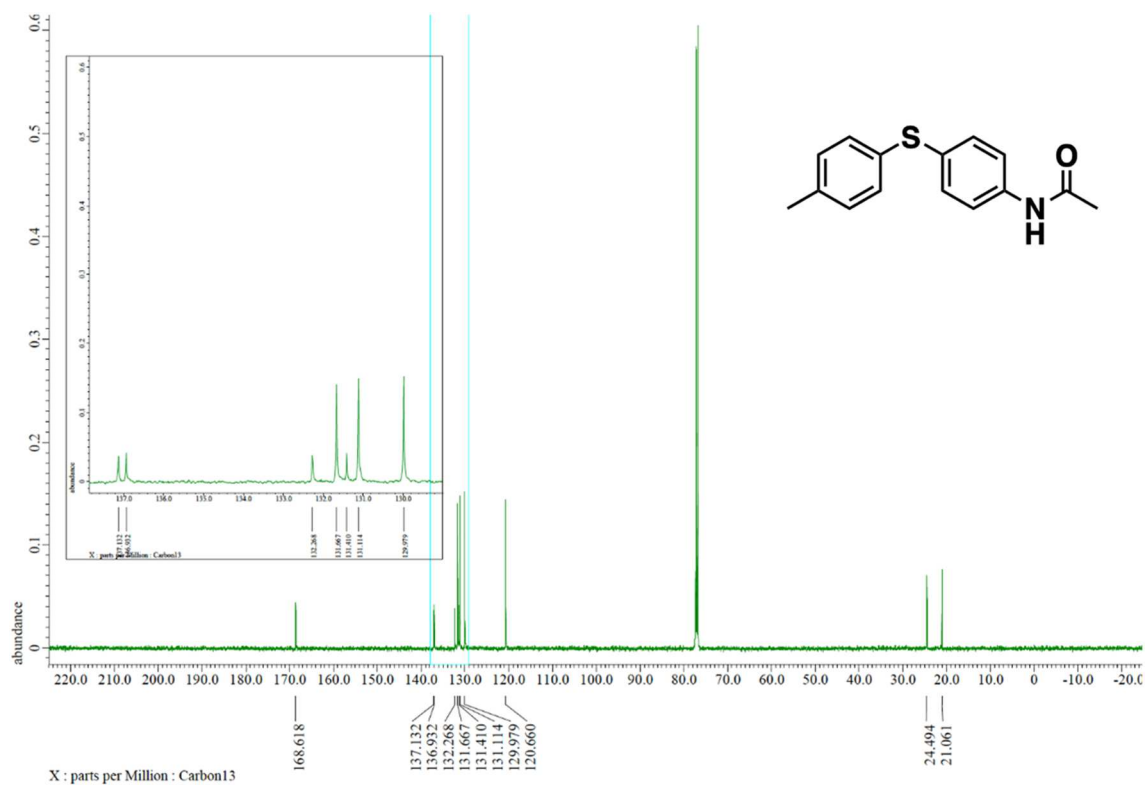

$^1\text{H}$  NMR spectrum (500 MHz,  $\text{CDCl}_3$ ) of **1bs**

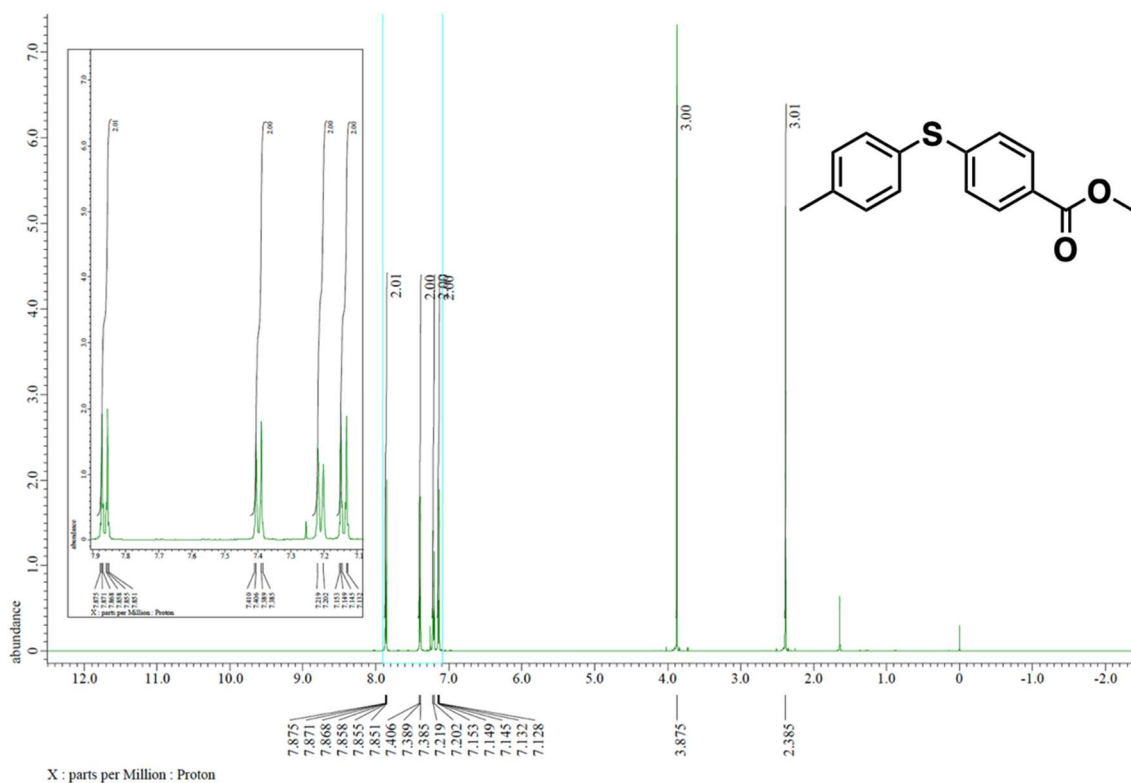

$^{13}\text{C}$  NMR spectrum (125 MHz,  $\text{CDCl}_3$ ) of **1bs**

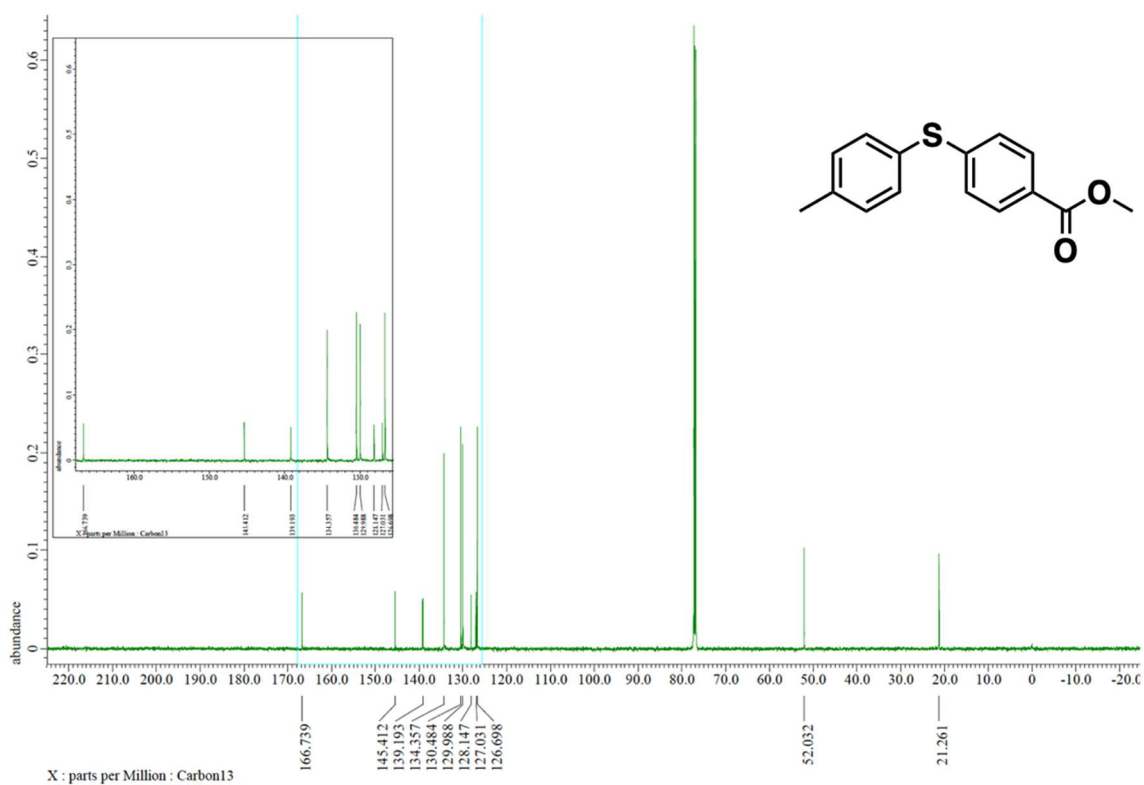

<sup>1</sup>H NMR spectrum (500 MHz, CDCl<sub>3</sub>) of **1bt**

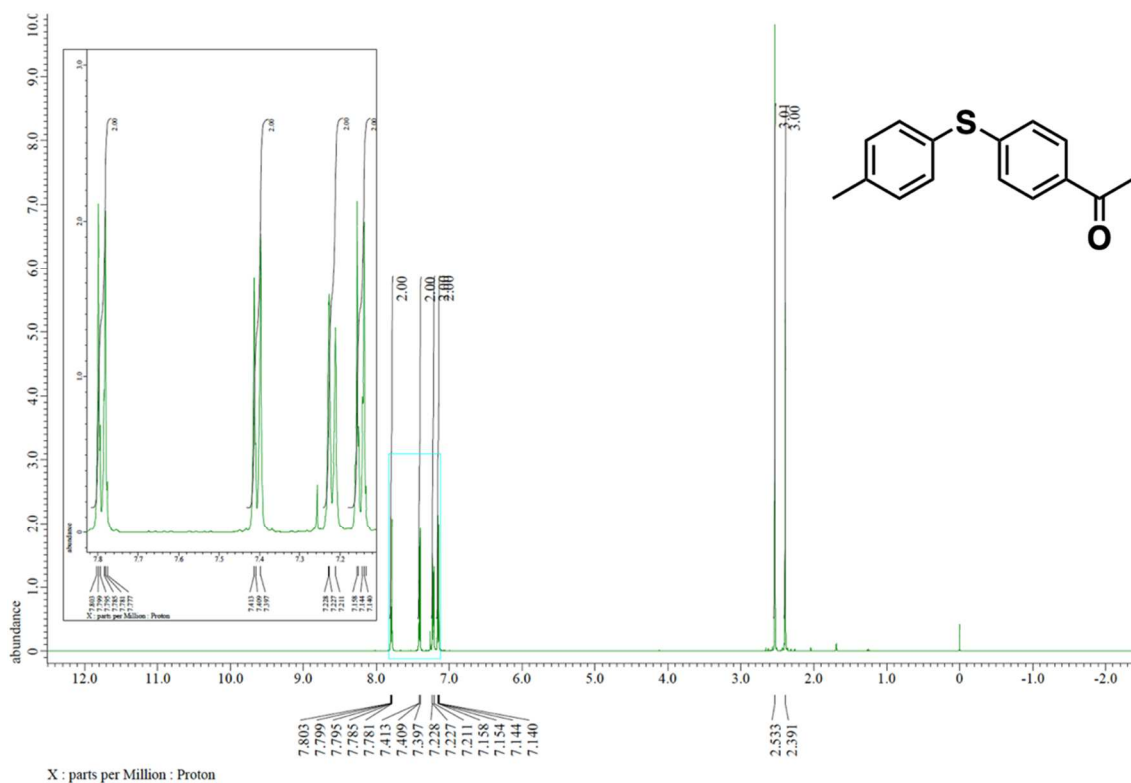

<sup>13</sup>C NMR spectrum (125 MHz, CDCl<sub>3</sub>) of **1bt**

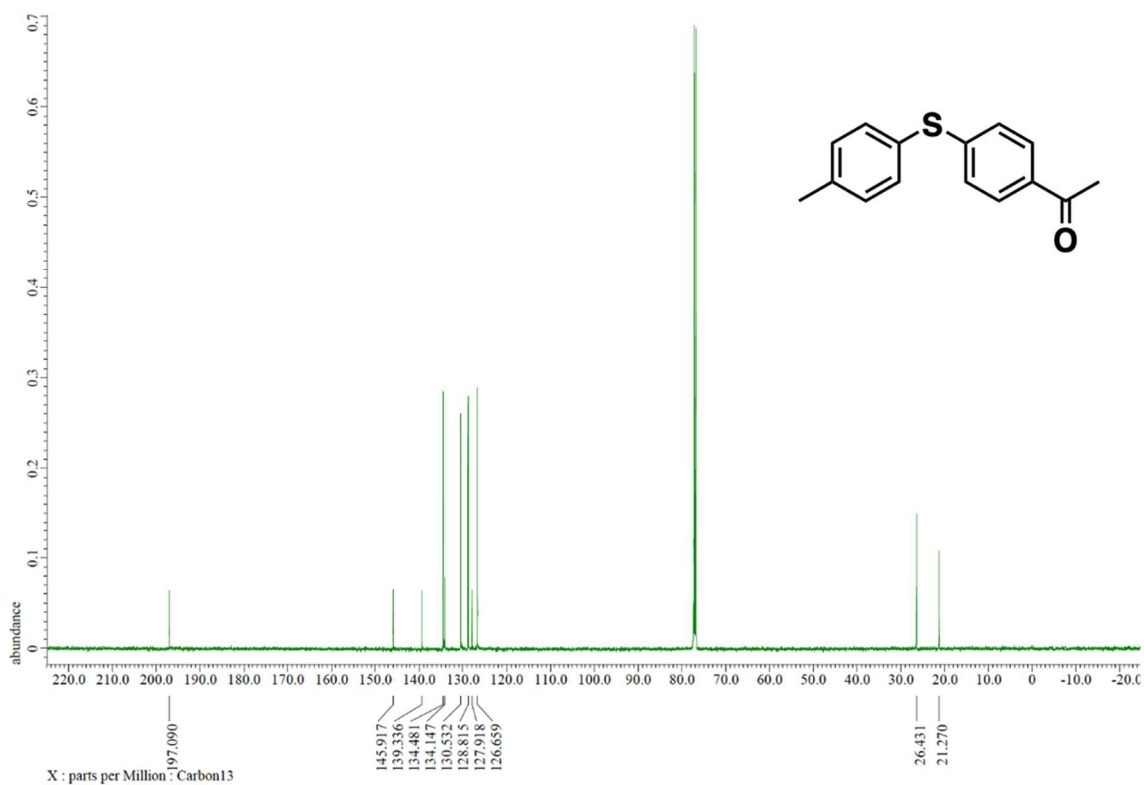

## Cartesian Coordinates of Optimized Structures

1a

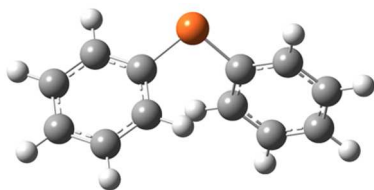

---

|   |             |             |             |
|---|-------------|-------------|-------------|
| C | 3.64652000  | -0.02296400 | -0.63281400 |
| C | 3.66346200  | 1.08878400  | 0.20185300  |
| C | 2.54102500  | 1.39414400  | 0.96867600  |
| C | 1.41119200  | 0.58836500  | 0.91326600  |
| C | 1.39003700  | -0.52012500 | 0.06316300  |
| C | 2.50956000  | -0.82144200 | -0.71280900 |
| S | -0.00019700 | -1.63807500 | 0.00015500  |
| C | -1.39013900 | -0.51975500 | -0.06304000 |
| C | -2.51081500 | -0.82238300 | 0.71077100  |
| C | -3.64756900 | -0.02365800 | 0.63058600  |
| C | -3.66323000 | 1.08961000  | -0.20209200 |
| C | -2.53966600 | 1.39623300  | -0.96673500 |
| C | -1.40996400 | 0.59026000  | -0.91115900 |
| H | 4.51668000  | -0.26482200 | -1.23890900 |
| H | 4.54836200  | 1.71838400  | 0.25548900  |
| H | 2.55008200  | 2.26022700  | 1.62681400  |
| H | 0.53942600  | 0.81684100  | 1.52302500  |
| H | 2.48229400  | -1.67894100 | -1.38221300 |
| H | -2.48459900 | -1.68108400 | 1.37868200  |
| H | -4.51861600 | -0.26652200 | 1.23500500  |
| H | -4.54799600 | 1.71938600  | -0.25583600 |
| H | -2.54767000 | 2.26351700  | -1.62330700 |
| H | -0.53729500 | 0.81980300  | -1.51922200 |

---

Pd<sub>20</sub>

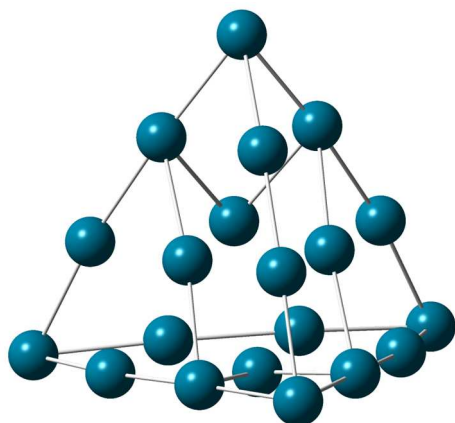

---

|    |             |             |             |
|----|-------------|-------------|-------------|
| Pd | 0.03855700  | 3.94712900  | 2.68423600  |
| Pd | -0.03896200 | -3.96626400 | 2.65646200  |
| Pd | 3.94617900  | -0.02829000 | -2.95914500 |
| Pd | -3.94541600 | 0.04888200  | -2.95970700 |
| Pd | -1.41196000 | 0.00920500  | 0.96356400  |
| Pd | 1.41152200  | -0.01529100 | 0.96340400  |
| Pd | -0.01558000 | -1.62592900 | -0.93528700 |
| Pd | 0.01522500  | 1.63213600  | -0.92465200 |
| Pd | 0.01285300  | 1.29973900  | 2.97665500  |
| Pd | 1.30135800  | -0.00277000 | -2.71456500 |
| Pd | -1.30054700 | 0.02060300  | -2.71531700 |
| Pd | -0.01304500 | -1.32112200 | 2.96769000  |
| Pd | -1.52221800 | 2.68416200  | 0.96282900  |
| Pd | 2.87102600  | -1.44540400 | -0.95697500 |
| Pd | 1.52207000  | -2.69046200 | 0.94476500  |
| Pd | -2.87046800 | 1.45256700  | -0.94814000 |
| Pd | 1.57448200  | 2.65769400  | 0.95996600  |
| Pd | 2.89939300  | 1.40023400  | -0.94909700 |
| Pd | -1.57519800 | -2.66391100 | 0.94208300  |
| Pd | -2.89927100 | -1.39290600 | -0.95877000 |

---



Au<sub>16</sub>Pd<sub>4</sub>

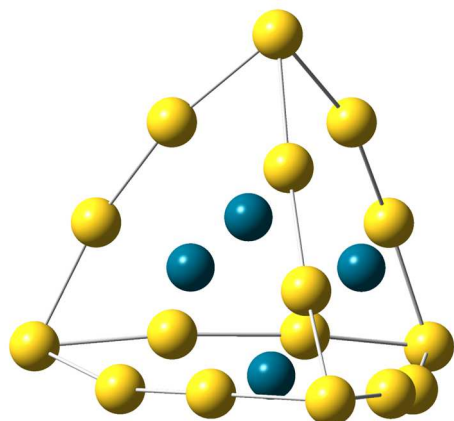

---

|    |             |             |             |
|----|-------------|-------------|-------------|
| Au | -0.17181100 | -4.16555700 | -2.88299200 |
| Au | -4.16623900 | 0.17112300  | 2.88310100  |
| Au | 0.17123300  | 4.16675600  | -2.88114400 |
| Au | 4.16609600  | -0.17277500 | 2.88297500  |
| Pd | -0.07411800 | -1.80217400 | 0.64363600  |
| Pd | -1.80294500 | 0.07350700  | -0.64437500 |
| Pd | 0.07428200  | 1.80236700  | 0.64347900  |
| Pd | 1.80307300  | -0.07422700 | -0.64396500 |
| Au | -2.02498400 | -3.01007800 | -1.07192000 |
| Au | 2.02623700  | 3.01126600  | -1.07080900 |
| Au | 3.17099600  | 1.77005200  | 1.07029400  |
| Au | -3.17013600 | -1.77100200 | 1.07053200  |
| Au | 1.77028400  | -3.16919300 | -1.07039900 |
| Au | -1.77119800 | 3.16968100  | -1.06947100 |
| Au | -3.01252400 | 2.02414800  | 1.07097000  |
| Au | 3.01097200  | -2.02559700 | 1.07145100  |
| Au | -0.05594300 | -1.39936700 | -2.35206200 |
| Au | 0.05707600  | 1.40052300  | -2.35076300 |
| Au | -1.40034700 | 0.05659000  | 2.34995700  |
| Au | 1.40012000  | -0.05626100 | 2.35099200  |

---

Au<sub>18</sub>Pd<sub>2</sub>

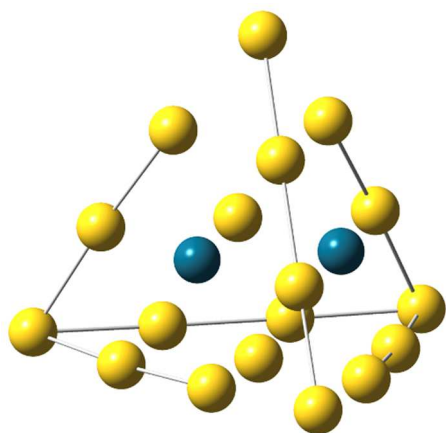

---

|    |             |             |             |
|----|-------------|-------------|-------------|
| Au | -4.19441400 | 0.02824400  | -2.94858800 |
| Au | -0.01919600 | -4.16763400 | 3.03047600  |
| Au | 0.02023700  | 4.15111100  | 3.05278600  |
| Au | 4.19393600  | -0.01085700 | -2.94961100 |
| Au | -0.00810100 | -1.55906600 | -0.95245400 |
| Pd | -1.55448700 | 0.00348200  | 1.02773700  |
| Pd | 1.55530000  | -0.00985400 | 1.02654700  |
| Au | 0.00699000  | 1.56342600  | -0.94335000 |
| Au | -2.97264600 | -1.51402300 | -0.94515200 |
| Au | 1.68625500  | 2.85333300  | 1.09697800  |
| Au | 2.97235400  | 1.51934200  | -0.93736400 |
| Au | -1.68642900 | -2.85996200 | 1.08192400  |
| Au | -1.37823400 | 0.01564600  | -3.03343100 |
| Au | 0.00704400  | 1.39658700  | 2.99784700  |
| Au | -0.00541500 | -1.41345100 | 2.99010800  |
| Au | 1.37715600  | 0.00219400  | -3.03327000 |
| Au | -2.95804100 | 1.54604600  | -0.93587100 |
| Au | -1.65919000 | 2.86856600  | 1.09794000  |
| Au | 1.65936500  | -2.87438200 | 1.08115000  |
| Au | 2.95785500  | -1.54141200 | -0.94628300 |

---

## Pd20\_1a\_C

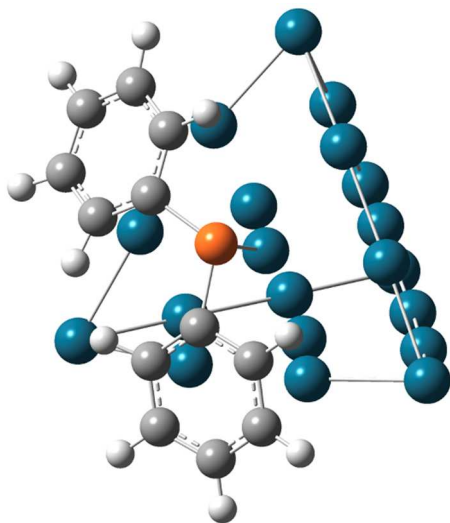

---

|    |             |             |             |
|----|-------------|-------------|-------------|
| Pd | 2.98667200  | -0.00105400 | 3.68398600  |
| Pd | -4.78833300 | 0.00646200  | 2.05953800  |
| Pd | 0.07004800  | -3.98617200 | -2.75702300 |
| Pd | 0.07814300  | 3.98545900  | -2.75896200 |
| Pd | -0.52413200 | 1.51806500  | 0.96423800  |
| Pd | -0.52836000 | -1.51896100 | 0.96116100  |
| Pd | -1.66833300 | 0.00251200  | -1.23068800 |
| Pd | 1.14805400  | -0.00190100 | -0.66400800 |
| Pd | 0.40984900  | -0.00261900 | 3.08645400  |
| Pd | 0.08615700  | -1.32659500 | -2.85156200 |
| Pd | 0.09223000  | 1.32504900  | -2.85164700 |
| Pd | -2.17934500 | 0.00053500  | 2.61707100  |
| Pd | 2.21212100  | 1.51646000  | 1.58192500  |
| Pd | -1.67532100 | -2.80018600 | -1.13882300 |
| Pd | -3.27067900 | -1.45844100 | 0.45420500  |
| Pd | 1.25310200  | 2.89956600  | -0.61207200 |
| Pd | 2.20916500  | -1.52040900 | 1.58412400  |
| Pd | 1.24897600  | -2.90029400 | -0.61212900 |
| Pd | -3.26569200 | 1.46598000  | 0.45567600  |
| Pd | -1.66684200 | 2.80357300  | -1.13752800 |
| H  | 3.22971300  | -2.54722100 | -2.61498300 |
| S  | 3.34431700  | -0.00319100 | -1.63650000 |
| C  | 3.41872700  | -2.63432700 | -1.54560300 |
| H  | 3.23318600  | 2.54024800  | -2.61544300 |

|   |            |             |             |
|---|------------|-------------|-------------|
| C | 3.85268100 | 1.50545900  | -0.81419200 |
| C | 3.42300400 | 2.62765100  | -1.54624800 |
| H | 3.03972100 | -4.77655300 | -1.50558700 |
| C | 3.84952300 | -1.51244000 | -0.81370800 |
| C | 3.25075900 | -3.89272700 | -0.90709800 |
| C | 4.18942500 | 1.64384700  | 0.55925200  |
| C | 3.25673500 | 3.88643700  | -0.90813500 |
| H | 4.75504900 | 0.88285400  | 1.08235500  |
| H | 3.04722500 | 4.77055600  | -1.50673800 |
| C | 4.00720500 | 2.90293200  | 1.19488300  |
| C | 3.49676800 | 3.99833500  | 0.47345700  |
| C | 4.18553900 | -1.65088300 | 0.56001000  |
| H | 4.38209900 | 3.04513600  | 2.20669500  |
| C | 3.49005000 | -4.00456200 | 0.47449000  |
| H | 3.34364400 | 4.95055200  | 0.97339500  |
| H | 4.75223800 | -0.89040700 | 1.08266500  |
| C | 4.00157700 | -2.90950700 | 1.19592600  |
| H | 3.33555900 | -4.95636800 | 0.97478400  |
| H | 4.37643500 | -3.05227900 | 2.20767900  |

---

## Pd20\_1a\_S

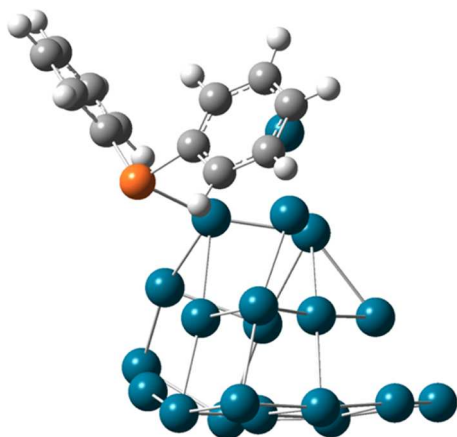

---

|    |             |             |             |
|----|-------------|-------------|-------------|
| Pd | 4.33878700  | -1.35580400 | 2.99082200  |
| Pd | 0.22798300  | 4.55027900  | 0.81676100  |
| Pd | -3.60060800 | -1.94214400 | 2.05096300  |
| Pd | 1.18387300  | -1.29869000 | -4.13352900 |
| Pd | 2.16020100  | 0.72301400  | -0.99516400 |
| Pd | 0.51174400  | 1.02232300  | 1.37700900  |
| Pd | -0.70640100 | 0.56609200  | -1.35805900 |
| Pd | 0.61754400  | -1.56208300 | 0.04693800  |
| Pd | 3.35128700  | 0.52333400  | 1.31344600  |
| Pd | -2.01114100 | -2.48269900 | -0.14511900 |
| Pd | -0.58097300 | -1.89995100 | -2.30848500 |
| Pd | 2.25962500  | 2.89796800  | 0.67766900  |
| Pd | 3.50275300  | -2.01545700 | 0.54268800  |
| Pd | -2.60870700 | 0.18648300  | 0.52057400  |
| Pd | -1.43506900 | 2.54648800  | 0.59115600  |
| Pd | 2.46647300  | -1.71585500 | -1.84722800 |
| Pd | 1.65786300  | -1.30906100 | 2.50032000  |
| Pd | -0.99302900 | -1.06086100 | 2.16906000  |
| Pd | 0.45916900  | 3.03080300  | -1.45980900 |
| Pd | 0.95082800  | 1.13477900  | -3.28959100 |
| H  | -3.40649900 | -4.26717300 | -1.72548200 |
| C  | -3.84934900 | -3.54444600 | -1.04310400 |
| H  | -3.51645000 | -1.84634900 | -2.37806900 |
| C  | -3.91085500 | -2.17413600 | -1.41604000 |
| C  | -4.50835200 | -3.98114500 | 0.12112500  |

|   |             |             |             |
|---|-------------|-------------|-------------|
| H | -4.47046000 | -5.03046900 | 0.40035900  |
| C | -4.64490600 | -1.26121900 | -0.61861300 |
| S | -4.44125700 | 0.48157900  | -1.03765500 |
| C | -5.25289000 | -3.08019900 | 0.89661700  |
| C | -5.77680100 | 1.25347800  | -0.12266600 |
| C | -5.32163800 | -1.70300500 | 0.53218800  |
| C | -7.05997700 | 1.23641700  | -0.67071500 |
| C | -5.52671300 | 1.88279500  | 1.09643200  |
| H | -7.23471400 | 0.74736100  | -1.62723600 |
| H | -4.51427100 | 1.87862300  | 1.50573100  |
| H | -5.88695400 | -3.45302600 | 1.69888800  |
| C | -8.10294800 | 1.84612100  | 0.01764600  |
| C | -6.57641700 | 2.49936500  | 1.77209000  |
| C | -7.86042800 | 2.47840800  | 1.23533300  |
| H | -9.10589400 | 1.83381200  | -0.40152600 |
| H | -6.38694900 | 2.99297100  | 2.72192000  |
| H | -5.99386900 | -1.02738600 | 1.05979200  |
| H | -8.67746400 | 2.95980300  | 1.76704300  |

---

Pd20\_1a\_T

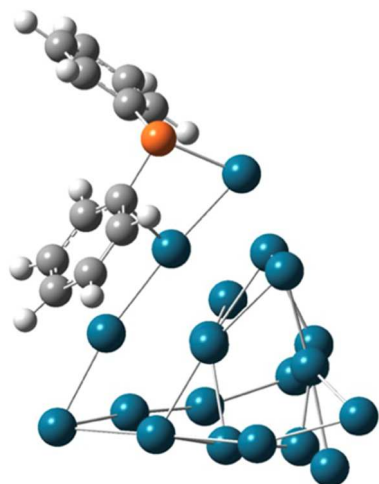

---

|    |             |             |             |
|----|-------------|-------------|-------------|
| Pd | 2.06254500  | -3.69839200 | 2.00860500  |
| Pd | -0.20129200 | 3.79058100  | 2.71889500  |
| Pd | -3.55834400 | -1.30667100 | -2.25159400 |
| Pd | 2.98155500  | 0.67672600  | -3.73956900 |
| Pd | 2.32810800  | 0.83272800  | 0.76469300  |
| Pd | -0.12944900 | -0.30358600 | 0.63571300  |
| Pd | -0.30275500 | 1.55647600  | -1.19534800 |
| Pd | 1.33564300  | -2.51936600 | -0.33414900 |
| Pd | 1.50703500  | -1.19109700 | 2.80621200  |
| Pd | -0.98597400 | -0.46814700 | -2.76213700 |
| Pd | 1.50224300  | -0.48570800 | -1.89112400 |
| Pd | 0.55539400  | 1.25917400  | 2.77928000  |
| Pd | 3.44629000  | -1.57245900 | 0.90721600  |
| Pd | -2.71254400 | 0.15926200  | -0.24639900 |
| Pd | -1.66013600 | 2.06729100  | 1.31518900  |
| Pd | 3.99796600  | -0.01278700 | -1.24469700 |
| Pd | -0.53433200 | -2.70930700 | 1.77316200  |
| Pd | -1.29388800 | -2.23771000 | -0.81219200 |
| Pd | 1.05034200  | 3.09617400  | 0.46886200  |
| Pd | 2.38731100  | 2.26060400  | -1.68771900 |
| H  | -6.28132800 | -3.58662800 | 1.50510900  |
| C  | -6.65440200 | -2.66841200 | 1.05875300  |
| H  | -4.89625200 | -2.37065100 | -0.17907500 |
| C  | -5.88044400 | -1.99978100 | 0.11472400  |

|   |             |             |             |
|---|-------------|-------------|-------------|
| C | -7.89730400 | -2.16221200 | 1.42954300  |
| H | -8.49813600 | -2.68917600 | 2.16663900  |
| C | -6.36644200 | -0.82068300 | -0.45028600 |
| S | -5.40893400 | 0.07787400  | -1.67455000 |
| C | -8.37645300 | -0.98578400 | 0.85778700  |
| C | -4.51487500 | 1.26828600  | -0.64841200 |
| C | -7.61327500 | -0.31037900 | -0.08849100 |
| C | -3.99285900 | 2.42143400  | -1.33127600 |
| C | -4.49355500 | 1.22130300  | 0.77447000  |
| H | -4.02625400 | 2.44686200  | -2.41918100 |
| H | -5.01683400 | 0.43244400  | 1.31005800  |
| H | -9.34893400 | -0.59456900 | 1.14565500  |
| C | -3.41960100 | 3.44228700  | -0.62070000 |
| C | -3.92838400 | 2.30221900  | 1.49883300  |
| C | -3.35323800 | 3.40051600  | 0.80963300  |
| H | -2.99791600 | 4.29670300  | -1.14411200 |
| H | -4.05469600 | 2.33556000  | 2.57887900  |
| H | -7.97722000 | 0.60789300  | -0.54515300 |
| H | -3.09759100 | 4.30863300  | 1.35317000  |

---



Au<sub>16</sub>Pd<sub>4</sub>\_1a\_C

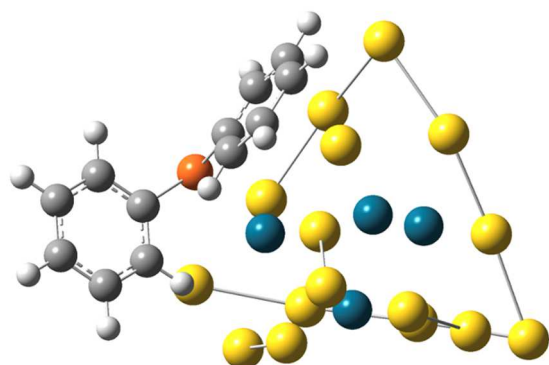


---

|    |             |             |             |
|----|-------------|-------------|-------------|
| Au | -2.38871400 | -3.12529800 | 2.98389900  |
| Au | 4.72151100  | -2.19192500 | -1.37179800 |
| Au | 1.28840900  | 4.28233600  | 2.46019000  |
| Au | -2.75535300 | 1.10435200  | -3.38827000 |
| Pd | -0.08862500 | -1.56216100 | -0.61957800 |
| Pd | 1.37844000  | -0.57368700 | 1.54448400  |
| Pd | 1.24239100  | 1.24184100  | -0.74023600 |
| Pd | -1.81247600 | 0.77485600  | -0.61580400 |
| Au | 0.19170600  | -3.19210700 | 1.77533600  |
| Au | 0.58178900  | 3.98772600  | -0.19658500 |
| Au | -0.69596200 | 2.79965100  | -2.30325600 |
| Au | 2.44336700  | -2.89853600 | 0.26555300  |
| Au | -2.46341000 | -2.92158900 | 0.15038300  |
| Au | 2.66745800  | 1.96922500  | 1.69869300  |
| Au | 3.78308900  | -0.04405300 | 0.16827100  |
| Au | -2.48333700 | -1.54010300 | -2.23316900 |
| Au | -1.51996700 | -0.72968000 | 1.76091300  |
| Au | -0.23109300 | 1.84821800  | 1.60768300  |
| Au | 2.25821500  | -1.08384400 | -2.07121300 |
| Au | -0.15509600 | 0.04899900  | -2.96858200 |
| H  | -2.22640200 | 3.86771700  | 1.97803900  |
| S  | -3.64979000 | 2.07956200  | 0.29522100  |
| C  | -2.52814200 | 3.02475500  | 2.60082100  |
| H  | -4.41804100 | -0.60481900 | -0.58033900 |
| C  | -5.23153700 | 1.23585500  | 0.17932500  |
| C  | -5.32323900 | -0.07162300 | -0.28684900 |
| H  | -1.48127800 | 3.73009500  | 4.34140400  |

|   |             |             |             |
|---|-------------|-------------|-------------|
| C | -3.35763100 | 2.02430500  | 2.07479000  |
| C | -2.13098800 | 2.95514700  | 3.93930700  |
| C | -6.37449400 | 1.93921400  | 0.56427800  |
| C | -6.57024400 | -0.68593700 | -0.36394500 |
| H | -6.28813400 | 2.96482300  | 0.91874700  |
| H | -6.63816500 | -1.70928200 | -0.72672300 |
| C | -7.61468800 | 1.31525700  | 0.49129300  |
| C | -7.71319800 | 0.00454100  | 0.02691500  |
| C | -3.82439000 | 0.99344200  | 2.88952800  |
| H | -8.50814300 | 1.85726900  | 0.79114600  |
| C | -2.57842900 | 1.91470400  | 4.75195500  |
| H | -8.68611800 | -0.47716800 | -0.03223500 |
| H | -4.47317100 | 0.21930500  | 2.48186000  |
| C | -3.43674200 | 0.95138200  | 4.22982600  |
| H | -2.26399800 | 1.86104800  | 5.79056100  |
| H | -3.79147500 | 0.13630900  | 4.85677500  |

---

Au<sub>18</sub>Pd<sub>2</sub>\_1a\_C

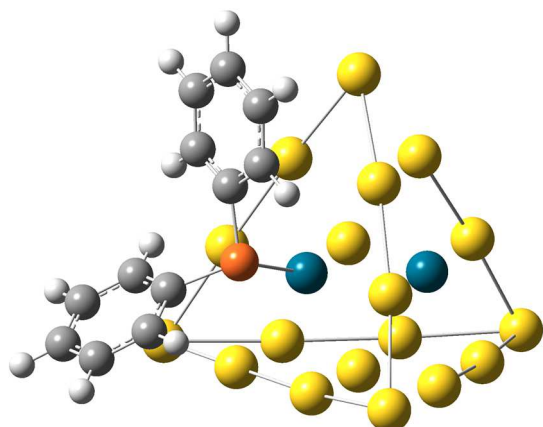


---

|    |             |             |             |
|----|-------------|-------------|-------------|
| Au | -1.48819000 | 3.82169800  | 2.85584800  |
| Au | 5.37392800  | -0.36888700 | 0.44013600  |
| Au | -0.98578400 | 0.85242500  | -4.94837800 |
| Au | -1.94235800 | -4.42331600 | 1.47970000  |
| Au | 0.77349900  | -0.36535900 | 1.83642000  |
| Au | 1.11066300  | 1.65374600  | -0.58591000 |
| Pd | 0.92856400  | -1.33797200 | -0.99991700 |
| Pd | -1.52063900 | -0.01960000 | -0.30529500 |
| Au | 0.94753000  | 2.55610300  | 2.18070600  |
| Au | -1.20534800 | -1.13608400 | -2.96544300 |
| Au | -1.54380700 | -2.86287500 | -0.82693000 |
| Au | 3.21615500  | 1.18341600  | 1.39836500  |
| Au | -1.62671500 | 1.02022700  | 2.57112000  |
| Au | 1.26505200  | 0.42565600  | -3.22840500 |
| Au | 3.38109400  | 0.07964400  | -1.46922600 |
| Au | -1.81623400 | -1.69773100 | 2.10518900  |
| Au | -1.37607300 | 2.90909100  | 0.20339300  |
| Au | -1.15848800 | 1.99170300  | -2.40657400 |
| Au | 3.04424000  | -1.87672400 | 0.86577800  |
| Au | 0.61970000  | -3.19732400 | 1.14583500  |
| H  | -5.22772400 | 2.09214700  | -2.23156400 |
| S  | -3.81127300 | 0.14389300  | -0.84376100 |
| C  | -5.24369500 | 2.40821700  | -1.19027800 |
| H  | -4.66632700 | -2.21395200 | -2.05091000 |
| C  | -4.66998700 | -1.26464400 | -0.11568000 |
| C  | -4.92881400 | -2.31371600 | -0.99858700 |

|   |             |             |             |
|---|-------------|-------------|-------------|
| H | -6.30276700 | 4.23563400  | -1.58048700 |
| C | -4.64177300 | 1.61009800  | -0.21586700 |
| C | -5.84155600 | 3.60920800  | -0.82125700 |
| C | -4.98918900 | -1.37872900 | 1.23603300  |
| C | -5.50852300 | -3.48606200 | -0.52197000 |
| H | -4.77093700 | -0.57383400 | 1.93239500  |
| H | -5.70279800 | -4.30602000 | -1.20879100 |
| C | -5.58716700 | -2.54806900 | 1.69834500  |
| C | -5.84064500 | -3.60308600 | 0.82524000  |
| C | -4.63188000 | 2.01013400  | 1.11930900  |
| H | -5.83525700 | -2.63770800 | 2.75319800  |
| C | -5.84626000 | 4.00560100  | 0.51307200  |
| H | -6.29435600 | -4.51859100 | 1.19652900  |
| H | -4.11006700 | 1.41839300  | 1.87153900  |
| C | -5.24597700 | 3.20432500  | 1.48124600  |
| H | -6.31096800 | 4.94589800  | 0.79903700  |
| H | -5.23045300 | 3.51708500  | 2.52310800  |

---

An initial structure of the **1a** oxidative adduct only on the Pd atom of Au<sub>18</sub>Pd<sub>2</sub>

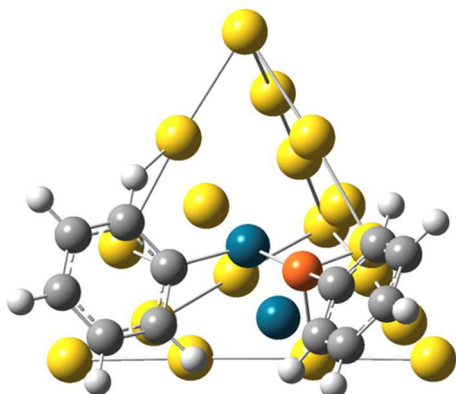

---

|    |             |             |             |
|----|-------------|-------------|-------------|
| Au | -4.19441000 | 0.02824000  | -2.94859000 |
| Au | -0.01920000 | -4.16763000 | 3.03048000  |
| Au | 0.02024000  | 4.15111000  | 3.05279000  |
| Au | 4.19394000  | -0.01086000 | -2.94961000 |
| Au | -0.00810000 | -1.55907000 | -0.95245000 |
| Pd | -1.55449000 | 0.00348000  | 1.02774000  |
| Pd | 1.55530000  | -0.00985000 | 1.02655000  |
| Au | 0.00699000  | 1.56343000  | -0.94335000 |
| Au | -2.97265000 | -1.51402000 | -0.94515000 |
| Au | 1.68626000  | 2.85333000  | 1.09698000  |
| Au | 2.97235000  | 1.51934000  | -0.93736000 |
| Au | -1.68643000 | -2.85996000 | 1.08192000  |
| Au | -1.37823000 | 0.01565000  | -3.03343000 |
| Au | 0.00704000  | 1.39659000  | 2.99785000  |
| Au | -0.00541000 | -1.41345000 | 2.99011000  |
| Au | 1.37716000  | 0.00219000  | -3.03327000 |
| Au | -2.95804000 | 1.54605000  | -0.93587000 |
| Au | -1.65919000 | 2.86857000  | 1.09794000  |
| Au | 1.65936000  | -2.87438000 | 1.08115000  |
| Au | 2.95785000  | -1.54141000 | -0.94628000 |
| H  | 4.70239000  | 3.94681000  | 1.68548000  |
| H  | 5.34348000  | -5.40604000 | 2.68746000  |
| H  | 3.44841000  | 2.24783000  | 0.37976000  |
| H  | 3.88807000  | -3.87608000 | 1.38175000  |
| C  | 4.00923000  | 3.28005000  | 2.19325000  |
| C  | 3.30697000  | 2.32845000  | 1.45595000  |

|   |            |             |            |
|---|------------|-------------|------------|
| C | 4.80722000 | -4.60763000 | 3.19524000 |
| C | 3.99202000 | -3.75079000 | 2.45793000 |
| C | 3.82120000 | 3.39187000  | 3.56818000 |
| H | 4.35781000 | 4.14668000  | 4.13717000 |
| C | 4.95000000 | -4.44187000 | 4.57016000 |
| C | 2.40066000 | 1.46657000  | 2.08442000 |
| H | 5.60015000 | -5.10140000 | 5.13915000 |
| C | 3.30062000 | -2.70859000 | 3.08640000 |
| S | 2.31279000 | -1.58030000 | 2.13133000 |
| C | 2.94312000 | 2.52270000  | 4.21694000 |
| C | 2.23778000 | 1.55893000  | 3.48627000 |
| C | 4.24651000 | -3.42621000 | 5.21892000 |
| C | 3.41986000 | -2.56422000 | 4.48825000 |
| H | 2.81125000 | 2.57916000  | 5.29606000 |
| H | 4.32501000 | -3.30614000 | 6.29805000 |
| H | 1.61584000 | 0.82434000  | 3.99697000 |
| H | 2.80443000 | -1.82418000 | 4.99895000 |

---

An optimized structure of the **1a** oxidative adduct only on the Pd atom of Au<sub>18</sub>Pd<sub>2</sub>

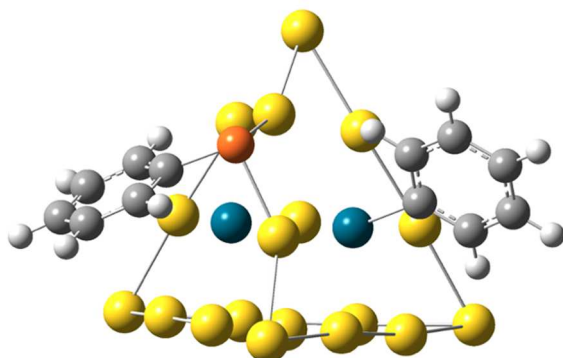

---

|    |             |             |             |
|----|-------------|-------------|-------------|
| Au | -3.09601700 | -4.19875500 | 0.39062900  |
| Au | -1.16299100 | 3.23826300  | 3.81523900  |
| Au | -0.20548300 | 1.67205700  | -4.91249200 |
| Au | 4.90209800  | -1.65188500 | 0.78506100  |
| Au | 0.16193700  | -0.91907700 | 1.73807300  |
| Pd | -1.53571800 | 0.41030600  | -0.29759500 |
| Pd | 1.22537300  | 1.42229500  | -0.09817300 |
| Au | 0.53486800  | -1.46483800 | -1.28278800 |
| Au | -2.64044800 | -1.63337400 | 1.46359300  |
| Au | 1.49145300  | 0.86350000  | -2.84353100 |
| Au | 3.24339600  | -0.36895400 | -1.07419500 |
| Au | -2.01964500 | 0.81802500  | 2.55958800  |
| Au | -0.36512200 | -3.56065500 | 0.55717800  |
| Au | -0.99928500 | 2.43841000  | -2.37105900 |
| Au | -0.94146800 | 3.10966700  | 1.03689900  |
| Au | 2.26938700  | -2.69715100 | 0.67983800  |
| Au | -2.28642200 | -2.19847300 | -1.41739600 |
| Au | -1.31371100 | -0.33813200 | -3.18924600 |
| Au | 0.95646600  | 1.73331300  | 2.75840400  |
| Au | 2.90537300  | -0.02145400 | 1.90650200  |
| H  | 5.51995900  | 4.16371200  | 0.65364300  |
| H  | -6.14579800 | 3.23151500  | 1.95235900  |
| H  | 4.14770800  | 2.13370800  | 0.85596300  |
| H  | -4.14181300 | 4.43433900  | 1.13469200  |
| C  | 4.54710600  | 4.13171100  | 0.16736600  |
| C  | 3.77001100  | 2.97886000  | 0.28366600  |
| C  | -5.57676500 | 2.82352000  | 1.12034900  |

|   |             |            |             |
|---|-------------|------------|-------------|
| C | -4.45687900 | 3.50824300 | 0.65666200  |
| C | 4.08704800  | 5.22796200 | -0.55619400 |
| H | 4.69877400  | 6.12276800 | -0.64144500 |
| C | -5.95322100 | 1.61497200 | 0.53995700  |
| C | 2.51614800  | 2.93480400 | -0.32615200 |
| H | -6.81523300 | 1.07179000 | 0.91861500  |
| C | -3.71132200 | 2.98543900 | -0.40192600 |
| S | -2.22341100 | 3.89907000 | -0.88271800 |
| C | 2.84255200  | 5.17027600 | -1.17405100 |
| C | 2.05508700  | 4.02185300 | -1.07012100 |
| C | -5.21956600 | 1.10587000 | -0.52810600 |
| C | -4.10705100 | 1.79234600 | -1.01000100 |
| H | 2.47238300  | 6.01586400 | -1.74996200 |
| H | -5.49951800 | 0.16196400 | -0.99174500 |
| H | 1.08986000  | 3.99160800 | -1.57596700 |
| H | -3.55122200 | 1.39429800 | -1.85959800 |

---



Ph spill-over (near another Pd)

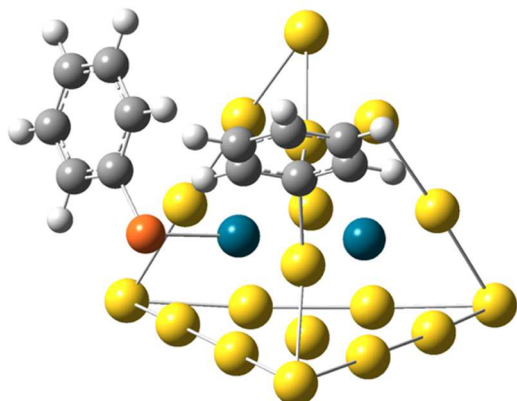

---

|    |             |             |             |
|----|-------------|-------------|-------------|
| Au | -4.74558400 | -1.42724800 | -2.04460200 |
| Au | 3.28364900  | 0.35885300  | -3.80547400 |
| Au | 1.14671500  | -3.56753600 | 3.55084400  |
| Au | -0.70844100 | 4.53248300  | 2.30664300  |
| Au | -0.80021200 | 1.27355100  | -1.32289300 |
| Pd | -0.04993900 | -1.54547500 | -0.76331800 |
| Pd | 1.41896400  | 0.42422800  | 0.72578000  |
| Au | -1.60057200 | -0.16589600 | 1.37924700  |
| Au | -2.05924100 | -0.92988800 | -2.75050000 |
| Au | 0.62696500  | -0.84930500 | 3.15313000  |
| Au | 0.06660700  | 1.88082500  | 2.73936300  |
| Au | 0.58267400  | -0.38147400 | -3.32242700 |
| Au | -3.58314500 | 0.67697400  | -0.58029100 |
| Au | 2.01853300  | -2.50226100 | 1.09641200  |
| Au | 2.76470100  | -1.10207300 | -1.46875500 |
| Au | -2.22516300 | 2.60363600  | 0.89613700  |
| Au | -2.80969100 | -2.28193700 | -0.20070900 |
| Au | -0.85242300 | -2.97815700 | 1.62060200  |
| Au | 2.00899600  | 1.82172400  | -1.77560400 |
| Au | 0.63119500  | 3.29465100  | 0.13531100  |
| H  | 5.12362700  | -5.45692800 | -1.48902800 |
| H  | 5.58223600  | 3.11285900  | -1.74619700 |
| H  | 2.95965600  | -4.24864000 | -1.40838000 |
| H  | 4.81528600  | 1.24266900  | -0.31603100 |
| C  | 5.04953000  | -4.51157700 | -0.95653600 |
| C  | 3.83589600  | -3.83499200 | -0.91269800 |

|   |            |             |             |
|---|------------|-------------|-------------|
| C | 5.00394700 | 3.32347600  | -0.84860200 |
| C | 4.57443700 | 2.27020400  | -0.04681600 |
| C | 6.16812800 | -3.97904200 | -0.31622300 |
| H | 7.11499000 | -4.51308200 | -0.35230200 |
| C | 4.67570200 | 4.63686100  | -0.51463300 |
| C | 3.72960000 | -2.60416400 | -0.22436600 |
| H | 4.99680700 | 5.45725600  | -1.15162700 |
| C | 3.80224700 | 2.52207700  | 1.09674800  |
| S | 3.16413800 | 1.18289700  | 2.07526400  |
| C | 6.08217700 | -2.76989200 | 0.37169800  |
| C | 4.87425000 | -2.08143700 | 0.42004400  |
| C | 3.94451100 | 4.89700600  | 0.64389900  |
| C | 3.51389400 | 3.84792700  | 1.45011400  |
| H | 6.95719300 | -2.36301200 | 0.87328400  |
| H | 3.69715800 | 5.92068100  | 0.91593900  |
| H | 4.79636800 | -1.13849000 | 0.96455800  |
| H | 2.92984000 | 4.04227300  | 2.34828000  |

---

Ph spill-over (far from another Pd)

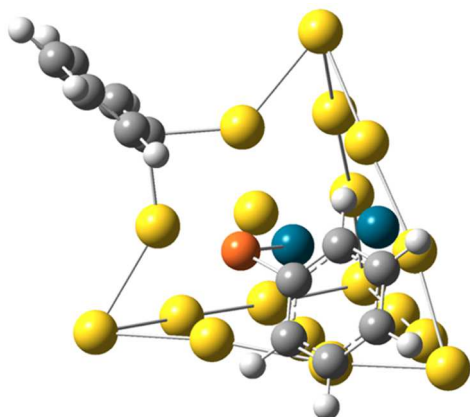

---

|    |             |             |             |
|----|-------------|-------------|-------------|
| Au | -5.18560400 | -1.35066700 | -0.24962700 |
| Au | 1.01107800  | 2.72634400  | -4.20315700 |
| Au | 2.70387900  | -4.39849500 | -0.06427300 |
| Au | 0.69356800  | 2.47583100  | 4.33883600  |
| Au | -1.29511300 | 1.40386100  | -0.03082000 |
| Pd | -0.49040600 | -1.00843800 | -1.52224700 |
| Pd | 1.58296000  | 0.15584300  | -0.01951500 |
| Au | -0.68608500 | -1.24226000 | 1.53074100  |
| Au | -3.20457000 | 0.03566500  | -1.68393800 |
| Au | 2.05629600  | -2.20900600 | 1.52574500  |
| Au | 1.51408500  | 0.26812600  | 2.80016200  |
| Au | -1.14383900 | 1.42213700  | -2.92985500 |
| Au | -3.37502900 | -0.01662600 | 1.42373100  |
| Au | 2.19835600  | -2.11854300 | -1.66818600 |
| Au | 1.68001800  | 0.30060800  | -2.90245400 |
| Au | -1.38127500 | 1.25235700  | 2.87945400  |
| Au | -2.60257600 | -2.50519500 | -0.20664300 |
| Au | 0.00109300  | -3.48763500 | -0.18936600 |
| Au | 1.01315400  | 2.76358400  | -1.39430200 |
| Au | 0.75938100  | 2.87563900  | 1.56512900  |
| H  | 4.28280200  | 6.14120000  | 0.22544500  |
| H  | 6.26877000  | -2.21813200 | -1.95027700 |
| H  | 3.48025100  | 3.79583700  | 0.28095900  |
| H  | 4.79452000  | -0.25108400 | -1.60423600 |
| C  | 3.21825300  | 5.93221800  | 0.14997800  |
| C  | 2.76865600  | 4.61623000  | 0.18344200  |

|   |             |             |             |
|---|-------------|-------------|-------------|
| C | 5.95610100  | -1.94817400 | -0.94395200 |
| C | 5.12994800  | -0.84405900 | -0.75498900 |
| C | 2.30643100  | 6.97804900  | 0.01849300  |
| H | 2.66319500  | 8.00516800  | -0.00749800 |
| C | 6.37455500  | -2.70649100 | 0.14792100  |
| C | 1.38823200  | 4.33427400  | 0.08428600  |
| H | 7.01520300  | -3.57201500 | -0.00320900 |
| C | 4.70990500  | -0.49324300 | 0.53387100  |
| S | 3.64790200  | 0.91765900  | 0.78081000  |
| C | 0.94010200  | 6.71778800  | -0.08072500 |
| C | 0.47813900  | 5.40712600  | -0.04876300 |
| C | 5.97287000  | -2.35137800 | 1.43485300  |
| C | 5.14296900  | -1.25171200 | 1.62954300  |
| H | 0.23363900  | 7.53813200  | -0.18377200 |
| H | 6.29980300  | -2.93715900 | 2.29092100  |
| H | -0.58774000 | 5.20058800  | -0.12849100 |
| H | 4.82005500  | -0.97196600 | 2.63154400  |

---

SPh spill-over (near another Pd)

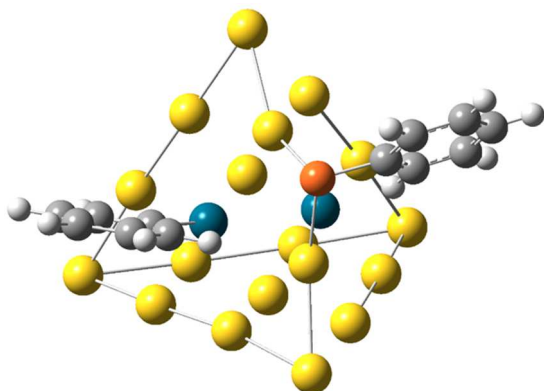

---

|    |             |             |             |
|----|-------------|-------------|-------------|
| Au | -0.45252600 | -5.22871600 | -0.26738200 |
| Au | 2.21185500  | 1.60761600  | -4.35133800 |
| Au | 2.03776400  | 1.14919200  | 4.60645000  |
| Au | -4.89486600 | 1.89510700  | 0.03002700  |
| Au | -1.06471200 | -0.64568500 | -1.60699700 |
| Pd | 1.39574000  | -0.64849400 | 0.02277500  |
| Pd | -0.02494300 | 1.89606000  | 0.05822500  |
| Au | -1.13909900 | -0.77639400 | 1.51901200  |
| Au | 0.65060300  | -2.99274400 | -1.58274500 |
| Au | -0.10906300 | 1.62848100  | 2.87654600  |
| Au | -2.50606500 | 1.81878000  | 1.49544300  |
| Au | 1.53450000  | -0.75948900 | -2.91477500 |
| Au | -2.11506900 | -2.97074900 | -0.15756300 |
| Au | 2.68246300  | 1.24859300  | 1.90785800  |
| Au | 2.55712700  | 1.63140500  | -1.58779000 |
| Au | -3.56615400 | -0.60310100 | -0.05272000 |
| Au | 0.55384700  | -3.14844600 | 1.34654500  |
| Au | 1.35161100  | -1.08832700 | 2.96695400  |
| Au | -0.11048300 | 1.86921700  | -2.81044000 |
| Au | -2.54922400 | 1.82885300  | -1.51867500 |
| H  | 2.18167700  | 6.21749500  | 1.38491600  |
| H  | 5.28502900  | -2.93227800 | -0.28840300 |
| H  | 1.91771400  | 3.77814200  | 1.25707100  |
| H  | 3.72120500  | -1.06780600 | 0.09975000  |
| C  | 1.28381100  | 5.80595300  | 0.92873700  |
| C  | 1.13670800  | 4.41990200  | 0.84964400  |

|   |             |             |             |
|---|-------------|-------------|-------------|
| C | 5.66425100  | -1.91270500 | -0.29644100 |
| C | 4.78239600  | -0.86128300 | -0.07850300 |
| C | 0.29090800  | 6.64788300  | 0.43927500  |
| H | 0.40725700  | 7.72684600  | 0.50584600  |
| C | 7.01598400  | -1.66146800 | -0.52367900 |
| C | -0.00738500 | 3.88302100  | 0.25941100  |
| H | 7.70288400  | -2.48672100 | -0.69379400 |
| C | 5.25119200  | 0.45366900  | -0.09249600 |
| S | 4.20277200  | 1.89907700  | 0.15974600  |
| C | -0.85480200 | 6.10166800  | -0.13123800 |
| C | -1.01511400 | 4.71852500  | -0.22175700 |
| C | 7.48225700  | -0.35116900 | -0.53169000 |
| C | 6.60463800  | 0.70894100  | -0.31811700 |
| H | -1.63961300 | 6.74989200  | -0.51567200 |
| H | 8.53576700  | -0.14602000 | -0.70601800 |
| H | -1.91797900 | 4.31127000  | -0.67235400 |
| H | 6.96777700  | 1.73462300  | -0.32655800 |

---

SPh spill-over (far from another Pd)

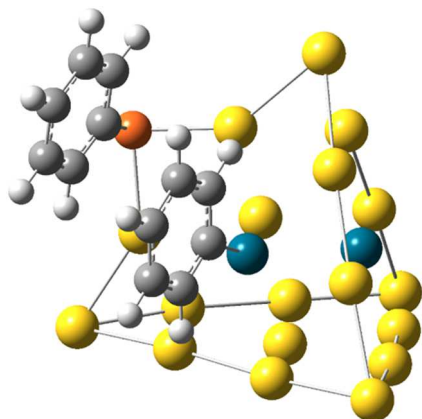


---

|    |             |             |             |
|----|-------------|-------------|-------------|
| Au | -5.07757800 | 1.15511300  | 1.51835500  |
| Au | 2.36335700  | 4.54250000  | -0.48129000 |
| Au | -0.43261700 | -2.14762300 | -4.71849400 |
| Au | 1.62541200  | -3.52515900 | 3.27688100  |
| Au | -0.23021500 | 0.79253600  | 1.61182900  |
| Pd | -0.99223900 | 1.14494100  | -1.16260000 |
| Pd | 1.57828200  | -0.39085200 | -0.65894300 |
| Au | -1.38471600 | -1.56229800 | 0.00854700  |
| Au | -2.59924800 | 2.35365200  | 0.93721900  |
| Au | 0.29210300  | -2.68882000 | -2.07114700 |
| Au | 1.05201600  | -3.03083700 | 0.55718100  |
| Au | -0.13291700 | 3.44433100  | 0.33591000  |
| Au | -2.85162800 | -0.35005600 | 2.27195600  |
| Au | 0.66085800  | 0.03192200  | -3.30160900 |
| Au | 1.55366300  | 2.22915200  | -1.87120500 |
| Au | -0.58631700 | -1.81846900 | 2.85942300  |
| Au | -3.64820600 | 0.09944000  | -0.70142800 |
| Au | -2.10429000 | -0.95211700 | -2.75806800 |
| Au | 2.38463200  | 2.12671300  | 0.95107400  |
| Au | 2.20440600  | -0.98078300 | 2.30015400  |
| H  | 6.35827100  | 0.79291300  | -1.96900600 |
| H  | 7.19954500  | -1.93196500 | 0.99965900  |
| H  | 4.08323500  | 1.28708200  | -1.21475200 |
| H  | 4.93427300  | -1.53134200 | 1.90917700  |
| C  | 5.63976600  | -0.02116600 | -1.89684000 |
| C  | 4.34441300  | 0.25940600  | -1.46338400 |

|   |            |             |             |
|---|------------|-------------|-------------|
| C | 6.87096800 | -0.91264600 | 1.18875100  |
| C | 5.59639100 | -0.69122200 | 1.69951000  |
| C | 6.01057400 | -1.32107300 | -2.22449100 |
| H | 7.02154800 | -1.53202600 | -2.56592100 |
| C | 7.71397500 | 0.15923800  | 0.91076800  |
| C | 3.41458600 | -0.77658800 | -1.35066800 |
| H | 8.71009600 | -0.02021100 | 0.51342800  |
| C | 5.16198200 | 0.61512000  | 1.93103400  |
| S | 3.58745800 | 0.96713700  | 2.71271200  |
| C | 5.07978700 | -2.34825600 | -2.11252800 |
| C | 3.77718000 | -2.08447400 | -1.68424400 |
| C | 7.27643400 | 1.46193600  | 1.13691200  |
| C | 6.00231100 | 1.69483800  | 1.64199700  |
| H | 5.35321000 | -3.37074800 | -2.36529600 |
| H | 7.92873000 | 2.30443600  | 0.91910000  |
| H | 3.06088200 | -2.89932100 | -1.61462900 |
| H | 5.65425400 | 2.71162600  | 1.81705000  |

---
